# Supplementary material
Source: publisher figshare collection journal article supplement (https://acs.figshare.com/ndownloader/files/4085806)

# Pd-Catalyzed Thiocarbonylation with stoichiometric Carbon Monoxide: Scope and Applications

Mia N. Burhardt, Rolf H. Taaning and Troels Skrydstrup\*

## Supporting Information

|              |                                                                                       |           |
|--------------|---------------------------------------------------------------------------------------|-----------|
| <b>I.</b>    | <b>General Methods</b> .....                                                          | <b>2</b>  |
| <b>II.</b>   | <b>Optimization Tables</b> .....                                                      | <b>2</b>  |
| <b>III.</b>  | <b>Equipment Used for the Thiocarbonylation</b> .....                                 | <b>3</b>  |
| <b>IV.</b>   | <b>General Procedures for the Thiocarbonylation of Electron rich Substrates</b> ..... | <b>3</b>  |
| <b>V.</b>    | <b>General Procedure for the Thiocarbonylation of Electron poor Substrates</b> .....  | <b>7</b>  |
| <b>VI.</b>   | <b>Thiocarbonylation-Arylation General Procedure</b> .....                            | <b>10</b> |
| <b>VII.</b>  | <b>Acyl Substitutions</b> .....                                                       | <b>11</b> |
| <b>VIII.</b> | <b>One-pot Procedure</b> .....                                                        | <b>13</b> |
| <b>IX.</b>   | <b>Synthesis of the Vortioxetine Analog</b> .....                                     | <b>14</b> |
| <b>X.</b>    | <b>Spectral Data</b> .....                                                            | <b>16</b> |

## I. General Methods:

Dry solvents were prepared according to standard literature procedures.<sup>1</sup> All other chemicals were used as received from the suppliers unless mentioned otherwise. Starting materials were made according to literature procedures. Flash column chromatography was performed on silica gel 60 (230-400 mesh). <sup>1</sup>H and <sup>13</sup>C NMR spectra were recorded at 400 MHz and 100 MHz, respectively, using a Varian Mercury 400 spectrometer. Chemical shifts are reported in ppm downfield to TMS ( $\delta = 0$ ) and referenced to the solvent residual peak,<sup>2</sup> using the following peak pattern abbreviations: br, broad; s, singlet; d, doublet; t, triplet; q, quartet; pent, pentet; sext, sextet; sept, septet; m, multiplet; dd, doublet of doublets; dt, doublet of triplets; ddd, doublet of doublet of doublets; ddt, doublet of doublet of triplets, and td, triplet of doublets. HRMS was recorded on a LC TOF (ES).

## II. Optimization Tables:

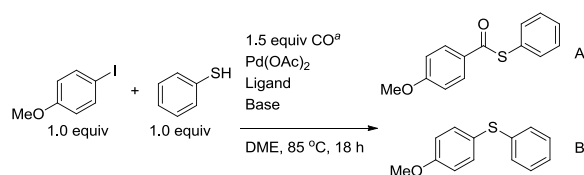

| entry           | ligand                                           | base                           | Conv. | ratio A:B      | yield |
|-----------------|--------------------------------------------------|--------------------------------|-------|----------------|-------|
| 1               | Josiphos                                         | NaO <sup>t</sup> Bu            | >95%  | B              | 91%   |
| 2               | Josiphos                                         | Et <sub>3</sub> N              | 13%   | 2:1            | —     |
| 3               | Josiphos                                         | K <sub>3</sub> PO <sub>4</sub> | 30%   | B              | —     |
| 4               | Josiphos                                         | K <sub>2</sub> CO <sub>3</sub> | 57%   | B              | —     |
| 5               | Josiphos                                         | <i>N</i> -Methyl morpholine    | 19%   | 1:1            | —     |
| 6               | Josiphos                                         | Pyridine                       | 3%    | 1:2            | —     |
| 7               | Josiphos                                         | NaOAc                          | 25%   | 1:1            | —     |
| 8               | Josiphos                                         | NaHCO <sub>3</sub>             | 16%   | 1:3            | —     |
| 9               | DPPF                                             | NaOAc                          | 81%   | 10:1           | 75%   |
| 10              | D <sup>i</sup> -PrPF                             | NaOAc                          | 12%   | 2:1            | —     |
| 11              | D <sup>t</sup> BuPF                              | NaOAc                          | 68%   | 1:2            | —     |
| 12              | Xantphos                                         | NaOAc                          | >95%  | A <sup>b</sup> | 86%   |
| 13 <sup>c</sup> | Xantphos                                         | NaOAc                          | >95%  | 11:1           | 82%   |
| 14 <sup>d</sup> | Xantphos                                         | NaOAc                          | >95%  | 4:1            | 74%   |
| 15              | DPEphos                                          | NaOAc                          | >95%  | A <sup>b</sup> | 93%   |
| 16 <sup>e</sup> | DPEphos                                          | NaOAc                          | >95%  | A <sup>b</sup> | 91%   |
| 17 <sup>f</sup> | DPEphos                                          | NaOAc                          | >95%  | A <sup>b</sup> | 89%   |
| 18              | dcpp·2HBF <sub>4</sub>                           | NaOAc                          | 0%    | —              | —     |
| 19              | dppe                                             | NaOAc                          | 0%    | —              | —     |
| 20              | dppp                                             | NaOAc                          | 0%    | —              | —     |
| 21              | dpppent                                          | NaOAc                          | 0%    | —              | —     |
| 22              | P <sup>t</sup> Bu <sub>3</sub> ·HBF <sub>4</sub> | NaOAc                          | 3%    | 1:2            | —     |
| 23              | CataXCiumA                                       | NaOAc                          | 0%    | —              | —     |
| 24              | PPh <sub>3</sub>                                 | NaOAc                          | 0%    | —              | —     |

Chamber 1: Thiophenol (0.25 mmol), *p*-iodoanisole (0.25 mmol), Pd(OAc)<sub>2</sub> (13 μmol), bidentate ligand (13 μmol) or monodentate ligand (25 μmol), base (0.28 mmol), DME (1.0 mL). <sup>a</sup> Chamber 2: Pd(dba)<sub>2</sub> (13 μmol), P<sup>t</sup>Bu<sub>3</sub> (13 μmol), 9-methylfluorene-9-carbonyl chloride (0.38 mmol, 1.5 equiv), Cy<sub>2</sub>NMe (0.56 mmol), DME (1.5 mL). <sup>b</sup> Traces of B was seen on the <sup>1</sup>H NMR. <sup>c</sup> The reaction was run at 75 °C. <sup>d</sup> The reaction was run at 65 °C. <sup>e</sup> Chamber 1: Pd(OAc)<sub>2</sub> (7.5 μmol), DPEphos (7.5 μmol). <sup>f</sup> Chamber 1: Pd(OAc)<sub>2</sub> (2.5 μmol), DPEphos (2.5 μmol).

<sup>1</sup> Perrin, D.; Armarego, W. *Purification of Laboratory Chemicals 3rd Ed.*, Pergamon Press, **1988**

<sup>2</sup> Gottlieb, H. E., Kotlyar V., Nudelman A. *J. Org. Chem.* **1997**, 62, 7512-7515.

## Solvent Screening

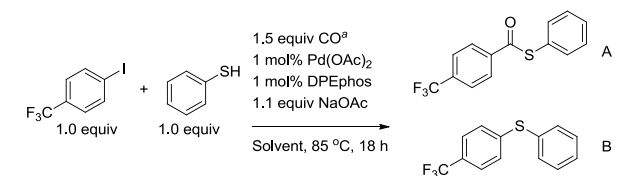

| entry | solvent             | Conv. | ratio<br>A:B | yield |
|-------|---------------------|-------|--------------|-------|
| 1     | Toluene             | >95%  | 2:3          | —     |
| 2     | Propionitrile       | >95%  | 1:5          | —     |
| 3     | Dioxane             | 89%   | 1:4          | —     |
| 4     | Anisole             | >95%  | 5:1          | 79%   |
| 5     | CPME                | >95%  | 1:1          | —     |
| 6     | Tol-CF <sub>3</sub> | >95%  | 2:1          | —     |

Chamber **1**: Thiophenol (0.25 mmol), *p*-iodoanisole (0.25 mmol), Pd(OAc)<sub>2</sub> (2.5 μmol), DPEphos (2.5 μmol), NaOAc (0.28 mmol), solvent (1.0 mL). <sup>a</sup> Chamber **2**: Pd(dba)<sub>2</sub> (13 μmol), P<sup>t</sup>Bu<sub>3</sub> (13 μmol), 9-methylfluorene-9-carbonyl chloride (0.38 mmol, 1.5 eq.), Cy<sub>2</sub>NMe (0.56 mmol), solvent (1.5 mL).

## III. Equipment Used for the Thiocarbonylation:

The thiocarbonylations were performed in a two-chamber reaction vessel with a total volume of 20 mL, using 9-methylfluorene-9-carbonyl chloride as the source of carbon monoxide. The two chambers were loaded in an argon filled glovebox. **Chamber 1** was loaded with the reactants for the thiocarbonylation, all thiols were injected into chamber 1 outside the glovebox prior to heating. **Chamber 2** was loaded with 1.5 equivalents of 9-methylfluorene-9-carbonyl chloride, Pd(dba)<sub>2</sub> (3.3 mol%), P<sup>t</sup>(Bu)<sub>3</sub>·HBF<sub>4</sub> (3.3 mol%), DME and Cy<sub>2</sub>NMe. The chambers were sealed with a screw cap, 2 mm stabilizing PTFE disc and a 2 mm thick PTFE-lined silicone disc before taking the two chamber vessel out of the glovebox and heating at 85°C.

## IV. General Procedures for the Thiocarbonylation of Electron rich Substrates

### Liquid Thiols used in the Thiocarbonylation

**Chamber 1:** Aryl iodide (0.25 mmol), Pd(OAc)<sub>2</sub> (0.234 mL stock solution, 2.5 μmol), DPEphos (1.3 mg, 2.5 μmol) and NaOAc (22.6 mg, 0.275 mmol) was dissolved in DME (0.766 mL). **Chamber 2:** 1.5 equivalents of CO was generated in chamber 2. The glassware was then removed from the glovebox, and the thiol (0.25 mmol) was injected into chamber 1 before mixing at 85 °C. After 18 h, the solvent was removed from chamber 1 *in vacuo* and the desired compound was purified by flash chromatography on silica gel using a pentane/CH<sub>2</sub>Cl<sub>2</sub> eluent system.

### Solid Thiols used in the Thiocarbonylation.

**Chamber 1:** Aryl iodide (0.25 mmol), Pd(OAc)<sub>2</sub> (0.234 mL stock solution, 2.5 μmol), DPEphos (1.3 mg, 2.5 μmol) and NaOAc (22.6 mg, 0.275 mmol) was added to chamber 1. **Chamber 2:** 1.5 equivalents of CO were generated in chamber 2. The glassware was then removed from the glovebox, and the thiol (0.25 mmol) was dissolved in DME (0.766 mL) and injected into chamber 1 before mixing at 85 °C. After 18 h, the solvent was removed from chamber 1 *in vacuo* and the desired compound was purified by flash chromatography on silica gel using a pentane/CH<sub>2</sub>Cl<sub>2</sub> eluent system.

**Chamber 2: 1.5 equivalents of CO:** 9-methylfluorene-9-carbonyl chloride (91 mg, 0.375 mmol), Pd(dba)<sub>2</sub> (7.5 mg, 0.013 mmol), P(<sup>t</sup>Bu)<sub>3</sub>·HBF<sub>4</sub> (3.8 mg, 0.013 mmol) was dissolved in DME (1.5 mL). Cy<sub>2</sub>NMe (121 μL, 0.563 mmol) was added before sealing of the glassware.

**Preparation of a Stock Solution:** A Pd(OAc)<sub>2</sub> in DME stock solution was prepared before loading of the two chambers. Pd(OAc)<sub>2</sub> (2.4 mg) was dissolved in DME (1 mL).

**S-Phenyl 4-methoxybenzothioate (1):**<sup>3</sup> The title compound was isolated as colorless crystals (54 mg, 0.22 mmol, 89%). <sup>1</sup>H NMR (400 MHz, CDCl<sub>3</sub>) δ (ppm) 8.02 (d, *J* = 9.2 Hz, 2H), 7.54-7.44 (m, 5H), 6.97 (d, *J* = 8.8 Hz, 2H), 3.88 (s, 3H). <sup>13</sup>C NMR (100 MHz, CDCl<sub>3</sub>) δ (ppm) 188.5, 164.0, 135.2, 129.7, 129.4, 129.3, 129.1, 127.6, 113.9, 55.5. HRMS (ESI) *m/z* calcd for C<sub>14</sub>H<sub>12</sub>O<sub>2</sub>S [M+H<sup>+</sup>]: 245.0631, found: 245.0632.

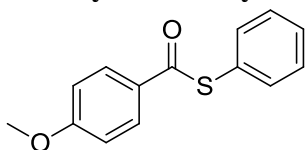

**S-Phenyl 3-methoxybenzothioate (3):** The title compound was isolated as a colorless oil (39 mg, 0.16 mmol, 64%). <sup>1</sup>H NMR (400 MHz, CDCl<sub>3</sub>) δ (ppm) 7.66 (d, *J* = 9.2 Hz, 1H), 7.54-7.45 (m, 6H), 7.40 (t, *J* = 8.4 Hz, 1H), 7.16 (dd, *J* = 8.4 Hz, *J* = 0.4 Hz, 1H), 3.87 (s, 3H). <sup>13</sup>C NMR (100 MHz, CDCl<sub>3</sub>) δ (ppm) 190.0, 159.8, 138.0, 135.0, 129.7, 129.5, 129.2, 127.4, 120.1, 120.0, 111.8, 55.5. HRMS (ESI) *m/z* calcd for C<sub>14</sub>H<sub>12</sub>O<sub>2</sub>S [M+Na<sup>+</sup>]: 267.0450, found: 267.0450.

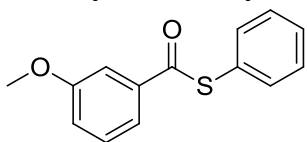

**S-Phenyl 2-methoxybenzothioate (4):**<sup>4</sup> The title compound was isolated as a colorless oil (47 mg, 0.19 mmol, 77%). <sup>1</sup>H NMR (400 MHz, CDCl<sub>3</sub>) δ (ppm) 7.86 (dd, *J* = 8.0 Hz, *J* = 1.6 Hz, 1H), 7.55-7.42 (m, 6H), 7.03 (t, *J* = 7.2 Hz, 2H), 3.96 (s, 3H). <sup>13</sup>C NMR (100 MHz, CDCl<sub>3</sub>) δ (ppm) 189.1, 158.2, 134.9, 134.1, 129.9, 129.3, 129.1, 128.8, 126.3, 120.5, 112.1, 56.0. HRMS (ESI) *m/z* calcd for C<sub>14</sub>H<sub>12</sub>O<sub>2</sub>S [M+Na<sup>+</sup>]: 267.0450, found: 267.0451.

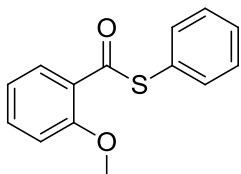

**S-Phenyl 3,4-dimethoxybenzothioate (5):**<sup>5</sup> The title compound was isolated as colorless crystals (52 mg, 0.19 mmol, 75%). <sup>1</sup>H NMR (400 MHz, CDCl<sub>3</sub>) δ (ppm) 7.75 (dd, *J* = 8.4 Hz, *J* = 2.0 Hz, 1H), 7.53-7.44 (m, 6H), 6.92 (d, *J* = 8.4 Hz, 1H), 3.96 (s, 3H), 3.93 (s, 3H). <sup>13</sup>C NMR (100 MHz, CDCl<sub>3</sub>) δ (ppm) 188.7, 153.7, 149.0, 135.1, 129.5, 129.4, 129.2, 127.6, 122.0, 110.3, 109.7, 56.1, 56.0. HRMS (ESI) *m/z* calcd for C<sub>15</sub>H<sub>14</sub>O<sub>3</sub>S [M+Na<sup>+</sup>]: 297.0556, found: 297.0554.

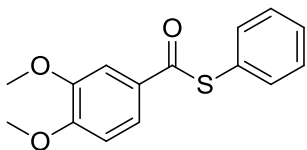

**S-Phenyl 2,4-dimethoxybenzothioate (6):**<sup>5</sup> The title compound was isolated as a colorless oil (59 mg, 0.21 mmol, 86%). <sup>1</sup>H NMR (400 MHz, CDCl<sub>3</sub>) δ (ppm) 7.91 (d, *J* = 8.8 Hz, 1H), 7.53-7.42 (m, 5H), 6.55 (dd, *J* = 8.8 Hz, *J* = 2.0 Hz, 1H), 6.51 (d, *J* = 2.0 Hz, 1H), 3.96 (s, 3H), 3.87 (s, 3H). <sup>13</sup>C NMR (100 MHz, CDCl<sub>3</sub>) δ (ppm) 187.4, 164.8, 160.5, 135.1, 132.2, 129.12, 129.07, 129.0, 119.2, 105.2, 98.7, 55.8, 55.6. HRMS (ESI) *m/z* calcd for C<sub>15</sub>H<sub>14</sub>O<sub>3</sub>S [M+Na<sup>+</sup>]: 279.0556, found: 279.0553.

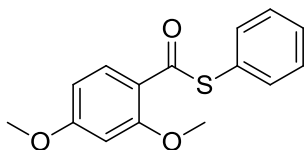

<sup>3</sup> Cao, H.; McNamee, L.; Alper, H. *J. Org. Chem.* **2008**, 73, 3530.

<sup>4</sup> Katritzky, A. R.; Shestopalov, A. A.; Suzuki, K. *Synthesis*, **2004**, 11, 1806.

<sup>5</sup> Kuhakarn, C.; Surapanich, N.; Kamtonwong, S.; Pohmakotr, M.; Reutrakul, V. *Eur. J. Org. Chem.* **2011**, 29, 5911.

**S-Phenyl 3,4,5-trimethoxybenzothioate (7):** The title compound was isolated as an orange oil (62 mg, 0.20 mmol, 81%). <sup>1</sup>H NMR (400 MHz, CDCl<sub>3</sub>) δ (ppm) 7.53-7.45 (m, 5H), 7.29 (s, 2H), 3.93 (s, 9H). <sup>13</sup>C NMR (100 MHz, CDCl<sub>3</sub>) δ (ppm) 189.2, 153.2, 142.2, 134.8, 131.7, 129.5, 129.2, 127.4, 104.8, 61.0, 56.3. HRMS (ESI) m/z calcd for C<sub>16</sub>H<sub>16</sub>O<sub>4</sub>S [M+H<sup>+</sup>]: 305.0842, found: 305.0839.

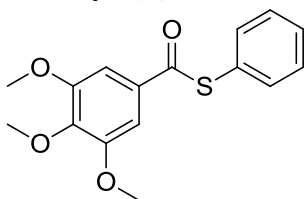

**S-Phenyl 4-((tert-butoxycarbonyl)(methyl)amino)benzothioate (8):** The title compound was isolated as colorless crystals (66 mg, 0.19 mmol, 77%). <sup>1</sup>H NMR (400 MHz, CDCl<sub>3</sub>) δ (ppm) 7.99 (d, *J* = 8.8 Hz, 2H), 7.53-7.51 (m, 2H), 7.47-7.44 (m, 3H), 7.39 (d, *J* = 8.8 Hz, 2H), 3.32 (s, 3H), 1.49 (s, 9H). <sup>13</sup>C NMR (100 MHz, CDCl<sub>3</sub>) δ (ppm) 189.0, 154.0, 148.6, 135.1, 132.7, 129.5, 129.2, 127.9, 127.3, 124.4, 81.3, 36.8, 28.3. HRMS (ESI) m/z calcd for C<sub>19</sub>H<sub>21</sub>NO<sub>3</sub>S [M+H<sup>+</sup>]: 344.1315, found: 344.1314.

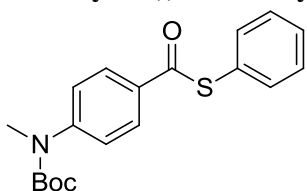

**S-Phenyl benzothioate (9):**<sup>3</sup> The title compound was isolated as colorless crystals (42 mg, 0.19 mmol, 78%). <sup>1</sup>H NMR (400 MHz, CDCl<sub>3</sub>) δ (ppm) 8.06-8.03 (m, 2H), 7.64-7.45 (m, 8H). <sup>13</sup>C NMR (100 MHz, CDCl<sub>3</sub>) δ (ppm) 190.1, 136.7, 135.1, 133.7, 129.5, 129.3, 128.8, 127.5, 127.4. HRMS (ESI) m/z calcd for C<sub>13</sub>H<sub>10</sub>OS [M+H<sup>+</sup>]: 215.0525, found: 215.0524.

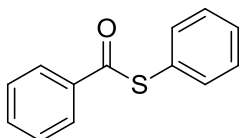

**S-Phenyl 4-(tert-butyl)benzothioate (10):**<sup>6</sup> The title compound was isolated as colorless crystals (56 mg, 0.21 mmol, 82%). <sup>1</sup>H NMR (400 MHz, CDCl<sub>3</sub>) δ (ppm) 7.98 (d, *J* = 8.4 Hz, 2H), 7.54-7.44 (m, 7H), 1.37 (s, 9H). <sup>13</sup>C NMR (100 MHz, CDCl<sub>3</sub>) δ (ppm) 189.6, 157.5, 135.1, 134.0, 129.4, 129.2, 127.6, 127.4, 125.7, 35.2, 31.1. HRMS (ESI) m/z calcd for C<sub>17</sub>H<sub>18</sub>OS [M+Na<sup>+</sup>]: 293.0971, found: 293.0975.

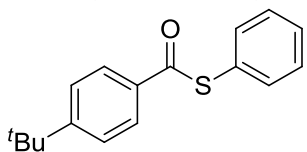

**S-Phenyl 4-methylbenzothioate (11):**<sup>3</sup> The title compound was isolated as colorless crystals (48 mg, 0.21 mmol, 84%). <sup>1</sup>H NMR (400 MHz, CDCl<sub>3</sub>) δ (ppm) 7.94 (d, *J* = 8.4 Hz, 2H), 7.54-7.45 (m, 5H), 7.29 (d, *J* = 8.4 Hz, 2H), 2.44 (s, 3H). <sup>13</sup>C NMR (100 MHz, CDCl<sub>3</sub>) δ (ppm) 189.7, 144.6, 135.1, 134.1, 129.4, 129.2, 127.6, 21.7. HRMS (ESI) m/z calcd for C<sub>14</sub>H<sub>12</sub>OS [M+H<sup>+</sup>]: 229.0682, found: 229.0679.

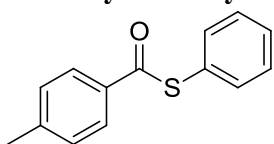

**S-Phenyl 3-methylbenzothioate (12):**<sup>7</sup> The title compound was isolated as a colorless oil (47 mg, 0.21 mmol, 82%). <sup>1</sup>H NMR (400 MHz, CDCl<sub>3</sub>) δ (ppm) 7.86-7.84 (m, 2H), 7.54-7.36 (m, 7H), 2.44 (s, 3H). <sup>13</sup>C NMR (100 MHz, CDCl<sub>3</sub>) δ (ppm) 190.2, 138.7, 136.7, 135.1, 134.4, 129.5, 129.2, 128.6, 127.7, 127.5, 124.7, 21.3. HRMS (ESI) m/z calcd for C<sub>14</sub>H<sub>12</sub>OS [M+Na<sup>+</sup>]: 251.0501, found: 251.0496.

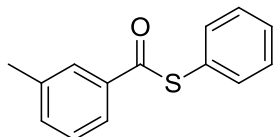

**S-Phenyl 2-methylbenzothioate (13):**<sup>7</sup> The title compound was isolated as colorless crystals (35 mg, 0.15 mmol, 61%). <sup>1</sup>H NMR (400 MHz, CDCl<sub>3</sub>) δ (ppm) 7.95 (dd, *J* = 7.6 Hz, *J* = 0.8 Hz, 1H), 7.55-7.41 (m, 6H), 7.32 (d, *J* = 7.6 Hz, 1H), 7.28 (d, *J* = 8.0 Hz, 1H), 2.51 (s, 3H). <sup>13</sup>C NMR (100 MHz, CDCl<sub>3</sub>) δ (ppm) 192.1, 137.4, 136.8, 134.9, 132.0, 131.7,

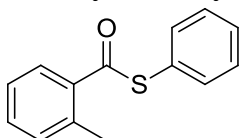

<sup>6</sup> Prangora, L.; Strelow, T.; Voss, J. *J. Chem. Res.* **1985**, 4, 1401.

<sup>7</sup> Dan, W.; Deng, H.; Chen, J.; Liu, M.; Ding, J.; Wu, H. *Tetrahedron* **2010**, 66, 7384.

129.4, 129.2, 128.6, 128.2, 125.8, 20.8. HRMS (ESI)  $m/z$  calcd for  $C_{14}H_{12}OS$   $[M+H]^+$ : 229.0682, found: 229.0680.

***tert*-Butyl 3-((phenylthio)carbonyl)-indole-1-carboxylate (15):**  $Pd(OAc)_2$  (0.468 mL stock solution, 0.005 5.0  $\mu$ mol), DPEphos (5.0  $\mu$ mol, 2.6 mg) was used in this reaction. It yielded the carbonylation products with and without the Boc protection group. The title compound was isolated as colorless solid (37 mg, 0.10 mmol, 41%).  $^1H$  NMR (400 MHz,  $CDCl_3$ )  $\delta$  (ppm) 8.47 (s, 1H), 8.21 (d,  $J = 7.6$  Hz, 1H), 8.17 (d,  $J = 8.4$  Hz, 1H), 7.58-7.56 (m, 2H), 7.51-7.46 (m, 3H), 7.40 (dt,  $J = 8.4$  Hz,  $J = 0.8$  Hz, 1H), 7.34 (dt,  $J = 8.0$  Hz,  $J = 1.2$  Hz, 1H), 1.73 (s, 9H).  $^{13}C$  NMR (100 MHz,  $CDCl_3$ )  $\delta$  (ppm) 183.8, 148.8, 136.4, 135.2, 131.2, 129.5, 129.2, 127.1, 126.8, 125.7, 124.5, 122.0, 119.3, 115.1, 85.6, 28.1. HRMS (ESI)  $m/z$  calcd for  $C_{20}H_{19}NO_3S$   $[M+Na]^+$ : 376.0978, found: 376.0974. The compound without Boc protection (***S*-phenyl indole-3-carbothioate (14)**) was isolated as colorless crystals (31 mg, 0.12 mmol, 49%).  $^1H$  NMR (400 MHz,  $CDCl_3$ )  $\delta$  (ppm) 8.64 (br. s, 1H), 8.28-8.24 (m, 1H), 8.10 (d,  $J = 3.2$  Hz, 1H), 7.59-7.56 (m, 2H), 7.49-7.41 (m, 4H), 7.32-7.28 (m, 2H).  $^{13}C$  NMR (100 MHz,  $CDCl_3$ )  $\delta$  (ppm) 183.1, 136.1, 135.3, 130.4, 129.2, 129.1, 127.7, 124.9, 123.9, 122.9, 121.9, 116.8, 111.5. HRMS (ESI)  $m/z$  calcd for  $C_{15}H_{11}NOS$   $[M+H]^+$ : 254.0634, found: 254.0634.

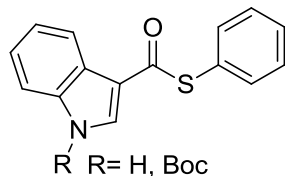

***S*-Phenyl thiophene-2-carbothioate (16):**<sup>3</sup> The title compound was isolated as orange crystals (45 mg, 0.20 mmol, 81%).  $^1H$  NMR (400 MHz,  $CDCl_3$ )  $\delta$  (ppm) 7.92 (dd,  $J = 4.0$  Hz,  $J = 1.2$  Hz, 1H), 7.67 (dd,  $J = 5.2$  Hz,  $J = 1.2$  Hz, 1H), 7.56-7.43 (m, 5H), 7.16 (dd,  $J = 4.8$  Hz,  $J = 3.6$  Hz, 1H).  $^{13}C$  NMR (100 MHz,  $CDCl_3$ )  $\delta$  (ppm) 182.0, 141.4, 135.0, 133.2, 131.6, 129.6, 129.2, 128.0, 126.9. HRMS (ESI)  $m/z$  calcd for  $C_{11}H_8OS_2$   $[M+Na]^+$ : 242.9909, found: 242.9906.

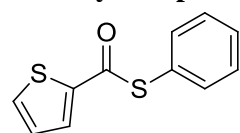

***S*-(4-Methoxyphenyl) 4-methoxybenzothioate (17):**<sup>8</sup> The title compound was isolated as colorless crystals (58 mg, 0.21 mmol, 84%).  $^1H$  NMR (400 MHz,  $CDCl_3$ )  $\delta$  (ppm) 8.01 (d,  $J = 8.8$  Hz, 2H), 7.41 (d,  $J = 8.8$  Hz, 2H), 6.98 (d,  $J = 8.8$  Hz, 2H), 6.95 (d,  $J = 8.8$  Hz, 2H), 3.87 (s, 3H), 3.84 (s, 3H).  $^{13}C$  NMR (100 MHz,  $CDCl_3$ )  $\delta$  (ppm) 189.5, 163.9, 160.7, 136.7, 129.7, 129.4, 118.2, 114.9, 113.9, 55.5, 55.4. HRMS (ESI)  $m/z$  calcd for  $C_{15}H_{14}O_3S$   $[M+Na]^+$ : 297.0556, found: 297.0552.

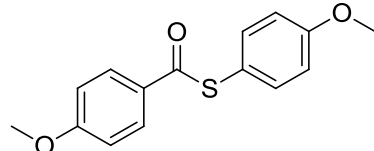

***S*-(2,6-Dimethylphenyl) 4-methoxybenzothioate (18):** The title compound was isolated as an yellow oil (48 mg, 0.18 mmol, 70%).  $^1H$  NMR (400 MHz,  $CDCl_3$ )  $\delta$  (ppm) 8.07 (d,  $J = 8.8$  Hz, 2H), 7.27 (dd,  $J = 8.8$  Hz,  $J = 6.4$  Hz, 1H), 7.20 (d,  $J = 7.6$  Hz, 2H), 6.98 (d,  $J = 8.8$  Hz, 2H), 3.89 (s, 3H), 2.41 (s, 6H).  $^{13}C$  NMR (100 MHz,  $CDCl_3$ )  $\delta$  (ppm) 187.6, 163.8, 143.3, 129.83, 129.78, 128.3, 126.9, 113.8, 55.6, 22.6. HRMS (ESI)  $m/z$  calcd for  $C_{16}H_{16}O_2S$   $[M+H]^+$ : 273.0944, found: 273.0940.

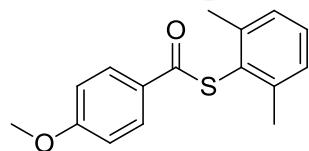

***S*-(3-Methoxyphenyl) 4-methoxybenzothioate (19):** The title compound was isolated as colorless crystals (56 mg, 0.20 mmol, 82%).  $^1H$  NMR (400 MHz,  $CDCl_3$ )  $\delta$  (ppm) 8.01 (d,  $J = 9.2$  Hz, 2H), 7.36 (t,  $J = 8.0$  Hz, 1H), 7.11 (ddd,  $J = 7.6$  Hz,  $J = 1.6$  Hz,  $J = 0.8$  Hz, 1H), 7.07 (dd,  $J = 2.4$  Hz,  $J = 1.6$  Hz, 1H), 6.99 (ddd,  $J = 8.0$  Hz,  $J = 2.4$  Hz,  $J = 0.8$  Hz, 1H), 6.96 (d,  $J = 8.8$  Hz, 2H), 3.88 (s, 3H), 3.83 (s, 3H).

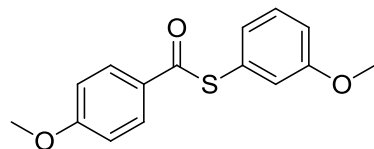

<sup>8</sup> Cilento, G. *J. Am. Chem. Soc.* **1953**, 75, 3748.

(s, 3H).  $^{13}\text{C}$  NMR (100 MHz,  $\text{CDCl}_3$ )  $\delta$  (ppm) 188.5, 164.0, 159.9, 129.9, 129.7, 129.4, 128.5, 127.4, 120.2, 115.6, 113.9, 55.5, 55.4. HRMS (ESI)  $m/z$  calcd for  $\text{C}_{15}\text{H}_{14}\text{O}_3\text{S}$  [ $\text{M}+\text{Na}^+$ ]: 297.0556, found: 297.0558.

**S-Octyl 4-methoxybenzothioate (20):**<sup>9</sup> The title compound was isolated as a yellow oil (50 mg, 0.18 mmol, 71%).  $^1\text{H}$  NMR (400 MHz,  $\text{CDCl}_3$ )  $\delta$  (ppm) 7.95 (d,  $J = 9.2$  Hz, 2H), 6.91 (d,  $J = 9.2$  Hz, 2H), 3.86 (s, 3H), 3.04 (t,  $J = 7.2$  Hz, 2H), 1.66 (pent,  $J = 6.8$  Hz, 2H), 1.45–1.24 (m, 10H), 0.88 (t,  $J = 6.8$  Hz, 3H).  $^{13}\text{C}$  NMR (100 MHz,  $\text{CDCl}_3$ )  $\delta$  (ppm) 190.6, 163.6, 130.2, 129.3, 113.7, 55.5, 31.8, 29.7, 29.16, 29.12, 28.95, 28.91, 22.6, 14.1. HRMS (ESI)  $m/z$  calcd for  $\text{C}_{16}\text{H}_{24}\text{O}_2\text{S}$  [ $\text{M}+\text{Na}^+$ ]: 303.1389, found: 303.1389.

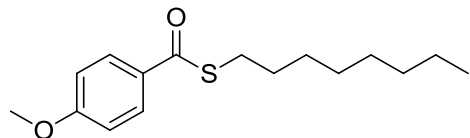

**(R)-Methyl 2-((tert-butoxycarbonyl)amino)-3-((4-methoxybenzoyl)thio)propanoate (21):** The title compound was isolated as colorless crystals (63 mg, 0.17 mmol, 68%).  $^1\text{H}$  NMR (400 MHz,  $\text{CDCl}_3$ )  $\delta$  (ppm) 7.92 (d,  $J = 9.2$  Hz, 2H), 6.91 (d,  $J = 8.8$  Hz, 2H), 5.33 (d,  $J = 7.6$  Hz, 1H), 4.59 (dd,  $J = 12.0$  Hz,  $J = 6.4$  Hz, 1H), 3.85 (s, 3H), 7.75 (s, 3H), 3.53 (m, 2H), 1.41 (s, 9H).  $^{13}\text{C}$  NMR (100 MHz,  $\text{CDCl}_3$ )  $\delta$  (ppm) 189.2, 171.1, 164.0, 155.0, 129.6, 129.3, 113.8, 80.1, 55.1, 53.4, 52.6, 30.9, 28.2. HRMS (ESI)  $m/z$  calcd for  $\text{C}_{17}\text{H}_{23}\text{NO}_6\text{S}$  [ $\text{M}+\text{Na}^+$ ]: 392.1138, found: 392.1134.

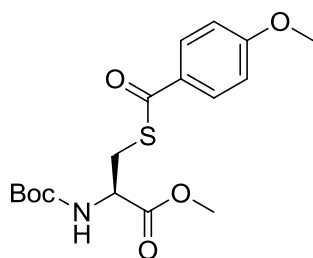

**(S)-Methyl 2-((R)-2-((tert-butoxycarbonyl)amino)-3-((4-methoxybenzoyl)thio)propanamido)propanoate (22):** The title compound was isolated as a colorless solid (79 mg, 0.18 mmol, 71%).  $^1\text{H}$  NMR (400 MHz,  $\text{CDCl}_3$ )  $\delta$  (ppm) 7.93 (d,  $J = 9.2$  Hz, 2H), 7.05 (br s, 1H), 6.90 (d,  $J = 9.2$  Hz, 2H), 5.45 (br. d,  $J = 7.2$  Hz, 1H), 4.55 (pent,  $J = 7.2$  Hz, 1H), 4.38 (br. s, 1H), 3.85 (s, 3H), 3.70 (s, 3H), 3.52 (dd,  $J = 14.4$  Hz,  $J = 4.4$  Hz, 1H), 3.36 (dd,  $J = 14.4$  Hz,  $J = 8.0$  Hz, 1H), 1.42 (d,  $J = 11.6$  Hz, 3H), 1.39 (s, 9H).  $^{13}\text{C}$  NMR (100 MHz,  $\text{CDCl}_3$ )  $\delta$  (ppm) 190.7, 172.9, 169.9, 169.6, 164.1, 129.7, 129.3, 113.8, 80.4, 55.5, 55.0, 52.4, 48.2, 30.9, 28.2, 18.3. HRMS (ESI)  $m/z$  calcd for  $\text{C}_{20}\text{H}_{28}\text{N}_2\text{O}_7\text{S}$  [ $\text{M}+\text{H}^+$ ]: 441.1690, found: 441.1693.

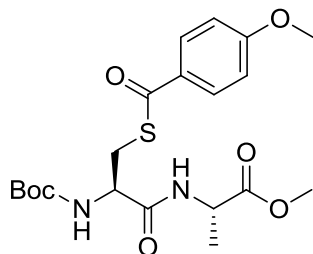

## V. General Procedure for the Thiocarbonylation of Electron poor Substrates:

**Chamber 1:** Aryl iodide (0.25 mmol),  $\text{Pd}(\text{OAc})_2$  (0.234 mL stock solution, 2.5  $\mu\text{mol}$ ), DPEphos (1.3 mg, 2.5  $\mu\text{mol}$ ) and NaOAc (22.6 mg, 0.275 mmol) was dissolved in Anisole (0.766 mL). **Chamber 2:** 1.5 equivalents of CO was generated in chamber 2. The glassware was then removed from the glovebox, and the thiol (0.25 mmol) was injected into chamber 1 before mixing at 85  $^\circ\text{C}$ . After 18 h, the solvent was removed from chamber 1 *in vacuo* and the desired compound was purified by flash chromatography on silica gel using a pentane/ $\text{CH}_2\text{Cl}_2$  eluent system.

**Chamber 2: 1.5 equivalents of CO:** 9-methylfluorene-9-carbonyl chloride (91 mg, 0.375 mmol),  $\text{Pd}(\text{dba})_2$  (7.5 mg, 0.013 mmol),  $\text{P}(\text{tBu})_3\cdot\text{HBF}_4$  (3.8 mg, 0.013 mmol) was dissolved in DME (1.5 mL).  $\text{Cy}_2\text{NMe}$  (121  $\mu\text{L}$ , 0.563 mmol) was added before sealing of the glassware.

<sup>9</sup> Takido, T.; Toriyama, M.; Itabashi, K. *Synthesis* **1988**, 5, 404.

**Preparation of a Stock Solution:** A Pd(OAc)<sub>2</sub> in anisole stock solution was prepared before loading of the two chambers. Pd(OAc)<sub>2</sub> (2.4 mg) was dissolved in anisole (1 mL).

**S-Phenyl 4-(trifluoromethyl)benzothioate (23):**<sup>3</sup> The title compound was isolated as colorless crystals (56 mg, 0.20 mmol, 79%). <sup>1</sup>H NMR (400 MHz, CDCl<sub>3</sub>) δ (ppm) 8.13 (d, *J* = 8.4 Hz, 2H), 7.76 (d, *J* = 8.4 Hz, 2H), 7.54-7.47 (m, 5H). <sup>13</sup>C NMR (100 MHz, CDCl<sub>3</sub>) δ (ppm) 189.3, 139.4, 135.0, 134.9 (q, *J*<sub>C-F</sub> = 32.7 Hz), 129.9, 129.4, 127.8, 126.6, 125.9 (q, *J*<sub>C-F</sub> = 3.7 Hz), 123.5 (q, *J*<sub>C-F</sub> = 272.7 Hz). <sup>19</sup>F NMR (377 MHz, CDCl<sub>3</sub>) δ (ppm) -63.14. HRMS (ESI) *m/z* calcd for C<sub>14</sub>H<sub>9</sub>F<sub>3</sub>OS [M+H<sup>+</sup>]: 283.0399, found: 283.0402.

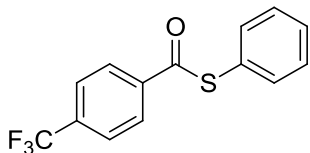

**S-Phenyl 3-chlorobenzothioate (24):**<sup>10</sup> The title compound was isolated as colorless crystals (47 mg, 0.19 mmol, 76%). <sup>1</sup>H NMR (400 MHz, CDCl<sub>3</sub>) δ (ppm) 7.99 (s, 1H), 7.92 (d, *J* = 7.6 Hz, 1H), 7.58 (d, *J* = 8.0 Hz, 1H), 7.53-7.42 (m, 6H). <sup>13</sup>C NMR (100 MHz, CDCl<sub>3</sub>) δ (ppm) 189.0, 138.2, 135.03, 135.00, 133.5, 130.0, 129.7, 129.3, 127.5, 126.8, 125.6. HRMS (ESI) *m/z* calcd for C<sub>13</sub>H<sub>9</sub>ClOS [M+Na<sup>+</sup>]: 270.9955, found: 270.9957.

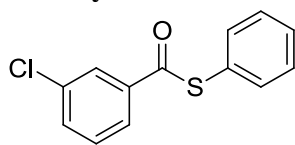

**S-Phenyl 4-chlorobenzothioate (25):**<sup>3</sup> The title compound was isolated as colorless crystals (54 mg, 0.22 mmol, 86%). <sup>1</sup>H NMR (400 MHz, CDCl<sub>3</sub>) δ (ppm) 7.97 (d, *J* = 8.8 Hz, 2H), 7.53-7.46 (m, 7H). <sup>13</sup>C NMR (100 MHz, CDCl<sub>3</sub>) δ (ppm) 189.0, 140.1, 135.04, 134.96, 129.7, 129.3, 129.1, 128.8, 126.9. HRMS (ESI) *m/z* calcd for C<sub>13</sub>H<sub>9</sub>ClOS [M+H<sup>+</sup>]: 249.0135, found: 249.0141.

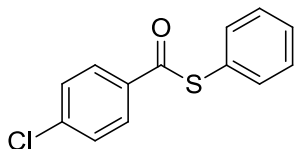

**S-Phenyl 4-bromobenzothioate (26):**<sup>3</sup> The title compound was isolated as colorless crystals (62 mg, 0.21 mmol, 84%). <sup>1</sup>H NMR (400 MHz, CDCl<sub>3</sub>) δ (ppm) 7.90 (d, *J* = 8.8 Hz, 2H), 7.63 (d, *J* = 8.4 Hz, 2H), 7.53-7.46 (m, 5H). <sup>13</sup>C NMR (100 MHz, CDCl<sub>3</sub>) δ (ppm) 189.2, 135.4, 135.0, 132.0, 129.7, 129.3, 128.9, 128.7, 126.9. HRMS (ESI) *m/z* calcd for C<sub>13</sub>H<sub>9</sub>BrOS [M+H<sup>+</sup>]: 292.9630, found: 292.9629.

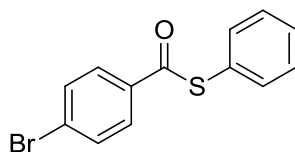

**Methyl 2-methoxy-5-((phenylthio)carbonyl)benzoate (27):** The title compound was isolated as colorless crystals (75 mg, 0.25 mmol, 99%). <sup>1</sup>H NMR (400 MHz, CDCl<sub>3</sub>) δ (ppm) 8.50 (d, *J* = 2.4 Hz, 1H), 8.14 (dd, *J* = 8.8 Hz, *J* = 2.4 Hz, 1H), 7.52-7.44 (m, 5H), 7.05 (d, *J* = 8.8 Hz, 1H), 3.98 (s, 3H), 3.92 (s, 3H). <sup>13</sup>C NMR (100 MHz, CDCl<sub>3</sub>) δ (ppm) 188.1, 165.5, 163.0, 135.1, 132.8, 131.6, 129.5, 129.2, 128.8, 127.1, 120.2, 111.9, 56.4, 52.3. HRMS (ESI) *m/z* calcd for C<sub>16</sub>H<sub>14</sub>O<sub>4</sub>S [M+Na<sup>+</sup>]: 325.0505, found: 325.0502.

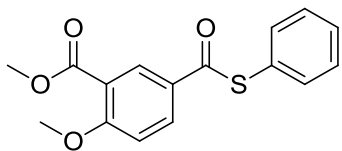

**Ethyl 4-((phenylthio)carbonyl)benzoate (28):** The title compound was isolated as colorless crystals (49 mg, 0.17 mmol, 68%). <sup>1</sup>H NMR (400 MHz, CDCl<sub>3</sub>) δ (ppm) 8.16 (d, *J* = 8.8 Hz, 2H), 8.07 (d, *J* = 8.8 Hz, 2H), 7.54-7.46 (m, 5H), 4.42 (q, *J* = 7.2 Hz, 2H), 1.42 (t, *J* = 7.2 Hz, 3H). <sup>13</sup>C NMR (100 MHz, CDCl<sub>3</sub>) δ (ppm) 189.7, 165.6, 139.8, 135.0, 134.8, 129.9, 129.8, 129.4, 127.4, 126.8, 61.5,

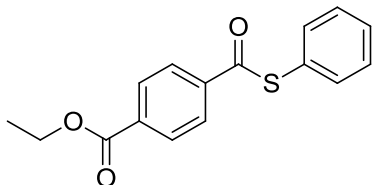

<sup>10</sup> Alvarez-Ibarra, C.; Mendoza, M.; Orellana, G.; Quiroga, M. L. *Synthesis*, **1989**, 7, 560.

14.3. HRMS (ESI)  $m/z$  calcd for  $C_{16}H_{14}O_3S$  [ $M+H^+$ ]: 287.0736, found: 287.0737.

**S-phenyl 4-acetylbenzothioate (29):** The title compound was isolated as colorless crystals (50 mg, 0.20 mmol, 79%).  $^1H$  NMR (400 MHz,  $CDCl_3$ )  $\delta$  (ppm) 8.10 (d,  $J = 8.7$  Hz, 2H), 8.05 (d,  $J = 8.6$  Hz, 2H), 7.53-7.46 (m, 5H), 2.65 (s, 3H).  $^{13}C$  NMR (100 MHz,  $CDCl_3$ )  $\delta$  (ppm) 197.2, 189.6, 140.6, 139.9, 135.0, 129.8, 129.4, 128.6, 127.7, 126.8, 26.9. HRMS (ESI)  $m/z$  calcd for  $C_{15}H_{12}O_2S$  [ $M+H^+$ ]: 257.0631, found: 257.0633.

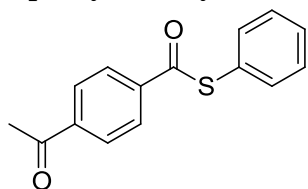

**S-Phenyl naphthalene-2-carbthioate (30):**<sup>3</sup> The title compound was isolated as colorless crystals (45 mg, 0.17 mmol, 69%).  $^1H$  NMR (400 MHz,  $CDCl_3$ )  $\delta$  (ppm) 8.55 (d,  $J = 8.4$  Hz, 1H), 8.23 (d,  $J = 7.2$  Hz, 1H), 8.05 (d,  $J = 8.0$  Hz, 1H), 7.90 (d,  $J = 7.6$  Hz, 1H), 7.63-7.50 (m, 8H).  $^{13}C$  NMR (100 MHz,  $CDCl_3$ )  $\delta$  (ppm) 192.2, 134.9, 134.7, 133.8, 133.3, 129.6, 129.4, 129.3, 128.4, 128.3, 128.1, 128.0, 126.7, 125.3, 124.5. HRMS (ESI)  $m/z$  calcd for  $C_{17}H_{12}OS$  [ $M+Na^+$ ]: 287.0501, found: 287.0501.

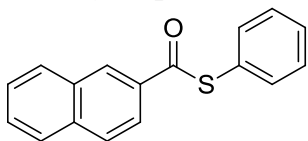

**S-phenyl 4-nitrobenzothioate (31):**<sup>11</sup> 3.0 equivalents of CO was generated in Chamber 2: 9-methylfluorene-9-carbonyl chloride (0.750 mmol, 182 mg),  $Pd(dba)_2$  (0.025 mmol, 14 mg),  $P(tBu)_3 \cdot HBF_4$  (0.025 mmol, 7.3 mg) was dissolved in DME (3.0 mL).  $Cy_2NMe$  (1.13 mmol, 240  $\mu$ L) was added prior before sealing the glassware. The title compound was isolated as pale yellow crystals (26 mg, 0.10 mmol, 40%).  $^1H$  NMR (400 MHz,  $CDCl_3$ )  $\delta$  (ppm) 8.34 (d,  $J = 8.9$  Hz, 2H), 8.18 (d,  $J = 8.9$  Hz, 2H), 7.54-7.48 (m, 5H).  $^{13}C$  NMR (100 MHz,  $CDCl_3$ )  $\delta$  (ppm) 188.8, 150.7, 141.3, 134.9, 130.1, 129.5, 128.5, 126.1, 124.0. HRMS (ESI)  $m/z$  calcd for  $C_{13}H_9NO_3S$  [ $M+H^+$ ]: 260.0376, found: 260.0377.

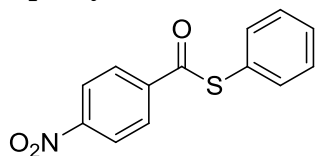

**S-(4-fluorophenyl) 4-methoxybenzothioate (32):** The title compound was isolated as colorless crystals (40 mg, 0.15 mmol, 60%).  $^1H$  NMR (400 MHz,  $CDCl_3$ )  $\delta$  (ppm) 8.00 (d,  $J = 8.8$  Hz, 2H), 7.48 (dd,  $J = 8.5$  Hz,  $J = 5.3$  Hz, 2H), 7.15 (t,  $J = 8.6$  Hz, 2H), 6.96 (d,  $J = 8.8$  Hz, 2H), 3.88 (s, 3H).  $^{13}C$  NMR (100 MHz,  $CDCl_3$ )  $\delta$  (ppm) 188.5, 164.1, 163.5 (d,  $J_{C-F} = 248$  Hz), 137.2 (d,  $J_{C-F} = 9.0$  Hz), 129.7, 129.1, 122.9 (d,  $J_{C-F} = 3.0$  Hz), 116.4 (d,  $J_{C-F} = 22$  Hz), 114.0, 55.6.  $^{19}F$  NMR (377 MHz,  $CDCl_3$ )  $\delta$  (ppm) -111.36. HRMS (ESI)  $m/z$  calcd for  $C_{14}H_{11}FO_2S$  [ $M+H^+$ ]: 263.0537, found: 263.0536.

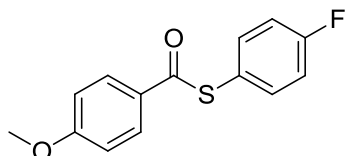

**S-Phenyl 3-methoxybenzothioate (3):** The title compound was isolated as a colorless oil (48 mg, 0.20 mmol, 79%).  $^1H$  NMR (400 MHz,  $CDCl_3$ )  $\delta$  (ppm) 7.66 (d,  $J = 9.2$  Hz, 1H), 7.54-7.45 (m, 6H), 7.40 (t,  $J = 8.4$  Hz, 1H), 7.16 (dd,  $J = 8.4$  Hz,  $J = 0.4$  Hz, 1H), 3.87 (s, 3H).  $^{13}C$  NMR (100 MHz,  $CDCl_3$ )  $\delta$  (ppm) 190.0, 159.8, 138.0, 135.0, 129.7, 129.5, 129.2, 127.4, 120.1, 120.0, 111.8, 55.5. HRMS (ESI)  $m/z$  calcd for  $C_{14}H_{12}O_2S$  [ $M+Na^+$ ]: 267.0450, found: 267.0450.

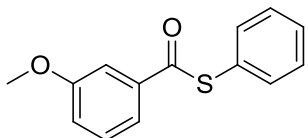

<sup>11</sup> Narayanaperumal, S.; Alberto, E.; Gul, K.; Kawasoko, C. Y.; Dornelles, L.; Rodrigues, O. E. D.; Braga, A. L. *Tetrahedron* **2011**, 67, 4723.

## VI. Thiocarbonylation-Arylation General Procedure:

### General Procedure for the Thiocarbonylation-Arylation:

**Chamber 1:** Aryl diiodide (0.25 mmol), Pd(OAc)<sub>2</sub> (0.234 mL stock solution, 2.5 μmol), DPEphos (1.3 mg, 2.5 μmol) and NaOAc (45.1 mg, 0.55 mmol) was dissolved in DME (0.766 mL). **Chamber 2:** 3.0 equivalents of CO were generated in chamber 2. The glassware was then removed from the glovebox, and the thiol (0.50 mmol) was injected into chamber 1 before mixing at 85 °C. After 18 h, the solvent was removed from chamber 1 *in vacuo* and the desired compound was purified by flash chromatography on silica gel using a pentane/CH<sub>2</sub>Cl<sub>2</sub> eluent system.

**Chamber 2: 3.0 equivalents of CO:** 9-methylfluorene-9-carbonyl chloride (182 mg, 0.750 mmol), Pd(dba)<sub>2</sub> (14 mg, 0.025 mmol), P(<sup>*t*</sup>Bu)<sub>3</sub>·HBF<sub>4</sub> (7.3 mg, 0.025 mmol) was dissolved in DME (3.0 mL). Cy<sub>2</sub>NMe (240 μL, 1.13 mmol) was added prior before sealing the glassware.

**S-Phenyl 4-(phenylthio)benzothioate (33):**<sup>12</sup> The title compound was isolated as colorless crystals (57 mg, 0.18 mmol, 70%). <sup>1</sup>H NMR (400 MHz, CDCl<sub>3</sub>) δ (ppm) 7.90 (d, *J* = 8.4 Hz, 2H), 7.54-7.41 (m, 10H), 7.23 (d, *J* = 8.4 Hz, 2H). <sup>13</sup>C NMR (100 MHz, CDCl<sub>3</sub>) δ (ppm) 189.1, 145.9, 135.1, 134.5, 134.1, 133.8, 131.8, 129.7, 129.5, 129.2, 129.0, 128.0, 127.4, 127.3. HRMS (ESI) *m/z* calcd for C<sub>19</sub>H<sub>14</sub>OS<sub>2</sub> [M+H<sup>+</sup>]: 323.0564, found: 323.0557.

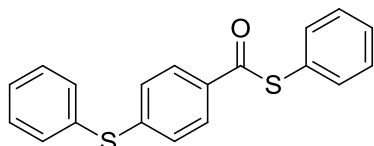

**S-Phenyl 3-(phenylthio)benzothioate (34):** The title compound was isolated as colorless crystals (34 mg, 0.11 mmol, 43%). <sup>1</sup>H NMR (400 MHz, CDCl<sub>3</sub>) δ (ppm) 7.91 (t, *J* = 2.0 Hz, 1H), 7.86 (d, *J* = 7.6 Hz, 1H), 7.51-7.30 (m, 12H). <sup>13</sup>C NMR (100 MHz, CDCl<sub>3</sub>) δ (ppm) 189.7, 138.4, 137.4, 135.0, 134.6, 133.7, 132.4, 129.62, 129.55, 129.4, 129.3, 128.3, 128.1, 127.1, 125.5. HRMS (ESI) *m/z* calcd for C<sub>19</sub>H<sub>14</sub>OS<sub>2</sub> [M+H<sup>+</sup>]: 323.0564, found: 323.0559.

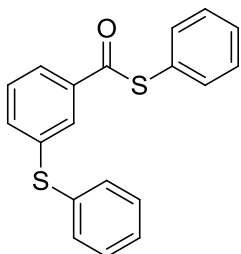

**S-Phenyl 2-(phenylthio)benzothioate (35):** The title compound was isolated as pale yellow crystals (42 mg, 0.13 mmol, 52%). <sup>1</sup>H NMR (400 MHz, CDCl<sub>3</sub>) δ (ppm) 8.09 (dd, *J* = 8.0 Hz, *J* = 1.6 Hz, 1H), 7.58-7.40 (m, 10H), 7.31 (dt, *J* = 7.6 Hz, *J* = 1.6 Hz, 1H), 7.23 (dt, *J* = 7.6 Hz, *J* = 1.2 Hz, 1H), 6.95 (dd, *J* = 8.0 Hz, *J* = 1.2 Hz, 1H). <sup>13</sup>C NMR (100 MHz, CDCl<sub>3</sub>) δ (ppm) 190.1, 140.6, 135.0, 134.1, 132.8, 132.5, 129.7, 129.6, 129.5, 129.3, 128.9, 128.5, 127.5, 124.8. HRMS (ESI) *m/z* calcd for C<sub>19</sub>H<sub>14</sub>OS<sub>2</sub> [M+H<sup>+</sup>]: 323.0564, found: 323.0558.

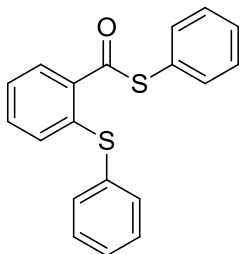

**S-(4-Methoxyphenyl) 4-((4-methoxyphenyl)thio)benzothioate (36):** The title compound was isolated as orange crystals (64 mg, 0.17 mmol, 67%). <sup>1</sup>H NMR (400 MHz, CDCl<sub>3</sub>) δ (ppm) 7.85 (d, *J* = 8.8 Hz, 2H), 7.49 (d, *J* = 8.8 Hz, 2H), 7.39 (d, *J* = 8.8 Hz, 2H), 7.10 (d, *J* = 8.4 Hz, 2H), 6.97 (d, *J* = 8.8 Hz, 2H), 6.97 (d, *J* = 9.2 Hz, 2H), 3.85 (s, 3H), 3.84 (s, 3H). <sup>13</sup>C NMR (100 MHz, CDCl<sub>3</sub>) δ (ppm) 190.0, 160.87,

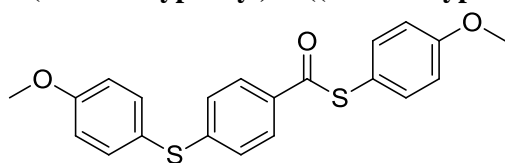

<sup>12</sup> Os'kina, I. A.; Vlasov, V. M. *Russ. J. Org. Chem.* **2008**, *44*, 561.

160.86, 147.7, 137.0, 136.8, 133.3, 128.0, 126.0, 121.3, 118.0, 115.6, 115.1, 55.6, 55.5. HRMS (ESI)  $m/z$  calcd for  $C_{21}H_{18}O_3S_2$  [ $M+Na^+$ ]: 405.0595, found: 405.0583.

***S,S*-diphenyl benzene-1,4-bis(carbothioate) (37):**<sup>13</sup> Anisole was used as the solvent in both chambers. The title compound was isolated as colorless crystals (30 mg, 0.09 mmol, 34%). <sup>1</sup>H NMR (400 MHz, CDCl<sub>3</sub>)  $\delta$  (ppm) 8.13 (s, 4H), 7.55-7.48 (m, 10H). <sup>13</sup>C NMR (100 MHz, CDCl<sub>3</sub>)  $\delta$  (ppm) 189.6, 163.9, 140.4, 135.0, 129.9, 129.4, 127.8, 126.7. HRMS (ESI)  $m/z$  calcd for  $C_{20}H_{14}O_2S_2$  [ $M+H^+$ ]: 351.0508, found: 351.0509.

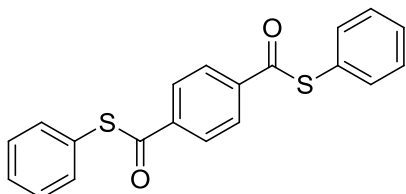

## VII. Acyl Substitutions

***N*-hexyl-4-methoxybenzamide (38):**<sup>14</sup> General protocol for acyl transfer 1: Thioester **17** (100 mg, 0.365 mmol) and hexylamine (36  $\mu$ L, 0.27 mmol) in 1:1 TEA/pyridine (1.0 mL) was mixed in a 4 mL vial sealed with a PTFE-coated screw cap, heated to 70 °C and stirred for 26 hours. The reaction was cooled to rt, evaporated *in vacuo* and EtOAc (40 mL) was added to the reaction mixture and subsequently washed with 1 M HCl (2 x 10 mL) and brine (10 mL). The organic phase was dried over Na<sub>2</sub>SO<sub>4</sub>, evaporated *in vacuo* and subjected to flash column chromatography on silica gel (30% EtOAc in pentane as the eluant) to obtain the title compound **38** (42 mg, 0.18 mmol, 95%) colorless solid. <sup>1</sup>H NMR (400 MHz, CDCl<sub>3</sub>)  $\delta$  (ppm) 7.71 (d,  $J$  = 8.8 Hz, 2H), 6.86 (d,  $J$  = 8.8 Hz, 2H), 6.25 (br s, 1H), 3.80 (s, 3H), 3.38 (q,  $J$  = 6.8 Hz, 2H), 1.56 (quint,  $J$  = 7.2 Hz, 2H), 1.38-1.23 (m, 6H), 0.85 (t,  $J$  = 6.8 Hz).

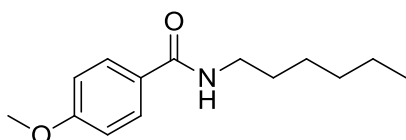

**(4-(2-hydroxyphenyl)piperazin-1-yl)(4-methoxyphenyl)methanone (39):** According to “General protocol for acyl transfer 1”: Thioester **17** (50 mg, 0.18 mmol), 2-(piperazin-1-yl)phenol (49 mg, 0.27 mmol). Flash column chromatography on silica gel (50% EtOAc in pentane as the eluant) afforded the title compound **39** (33 mg, 0.11 mmol, 58%) as a colorless solid. <sup>1</sup>H NMR (400 MHz, CDCl<sub>3</sub>)  $\delta$  (ppm) 7.42 (d,  $J$  = 8.8 Hz, 2H), 7.13-7.05 (m, 2H), 6.97-6.89 (m, 1H), 6.92 (d,  $J$  = 8.4 Hz, 2H), 6.86 (td,  $J$  = 8.0, 1.6 Hz, 1H), 3.82 (s, 3H), 3.85-3.69 (m, 4H), 2.87 (br s, 4H). <sup>13</sup>C NMR (100 MHz, CDCl<sub>3</sub>)  $\delta$  (ppm) 170.7, 161.1, 151.5, 138.5, 129.4 (2C), 127.7, 127.1, 121.6, 120.4, 114.7, 114.0 (2C), 67.3 (2C), 55.6, 52.9 (br, 2C). HRMS (ESI)  $m/z$  calcd for  $C_{18}H_{20}N_2O_3$  [ $M+H^+$ ]: 313.1547, found: 313.1546.  $R_f$  (50% EtOAc in pentane) = 0.31.

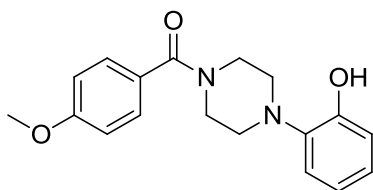

**4-methoxy-*N,N*-dimethylbenzamide (40):**<sup>15</sup> According to “General protocol for acyl transfer 1”: Thioester **17** (50 mg, 0.18 mmol), dimethylamine hydrochloride (45 mg, 0.55 mmol). Flash column chromatography on silica gel (50% EtOAc in pentane as the eluant) afforded the title compound **40** (29 mg, 0.16 mmol, 90%) as a colorless oil. <sup>1</sup>H NMR (400 MHz, CDCl<sub>3</sub>)  $\delta$  (ppm) 7.36 (d,  $J$  = 8.8 Hz, 2H), 6.86 (d,  $J$  = 8.8 Hz, 2H), 3.79 (s, 3H), 3.01 (br s, 6H). <sup>13</sup>C NMR (100 MHz, CDCl<sub>3</sub>)  $\delta$  (ppm) 171.7, 160.8, 129.3 (2C), 128.6, 113.7 (2C), 55.5, 40.1

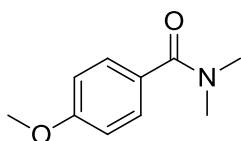

<sup>13</sup> Bandgar, B. P.; More, P. E.; Kamble, V. T.; Sawant, S. S. *Aust. J. Chem.* **2008**, *61*, 1006.

<sup>14</sup> Hermange, P.; Lindhardt, A. T.; Taaning, R. H.; Bjerglund, K.; Lupp, D.; Skrydstrup, T. *J. Am. Chem. Soc.* **2011**, *133*, 6061.

<sup>15</sup> Sawant, D. N.; Wagh, Y. S.; Bhatte, K. D.; Bhanage, B. M. *J. Org. Chem.*, **2011**, *76*, 5489.

(br), 35.7 (br). HRMS (ESI)  $m/z$  calcd for  $C_{10}H_{13}NO_2$   $[M+H]^+$ : 180.1019, found: 180.1019.  $R_f$  (50% EtOAc in pentane) = 0.21.

***tert*-butyl (3-(4-methoxybenzamido)propyl)carbamate (41):** According to “General protocol for acyl transfer 1”: Thioester **17** (100 mg, 0.37 mmol), *tert*-butyl (3-aminopropyl)carbamate (96 mg, 0.55 mmol). Flash column chromatography on silica gel (50% EtOAc in pentane as the eluant) afforded the title compound **41** (107 mg, 0.35 mmol, 95%) as a colorless solid.  $^1H$  NMR (400 MHz,  $CDCl_3$ )  $\delta$  (ppm) 7.76 (d,  $J$  = 8.4 Hz, 2H), 7.35 (br t), 6.84 (d,  $J$  = 8.8 Hz, 2H), 5.22 (br t,  $J$  = 6.4 Hz, 1H), 3.77 (s, 3H), 3.41 (q,  $J$  = 6.0 Hz, 2H), 3.15 (q,  $J$  = 6.4 Hz, 2H), 1.62 (quint,  $J$  = 5.6 Hz, 2H), 1.38 (s, 9H).  $^{13}C$  NMR (100 MHz,  $CDCl_3$ )  $\delta$  (ppm) 167.4, 162.1, 157.0, 128.9 (2C), 126.9, 113.7 (2C), 79.3, 55.4, 37.2, 36.2, 30.2, 28.5 (3C). HRMS (ESI)  $m/z$  calcd for  $C_{16}H_{24}N_2O_4$   $[M+H]^+$ : 309.1809, found: 309.1813.  $R_f$  (50% EtOAc in pentane) = 0.24.

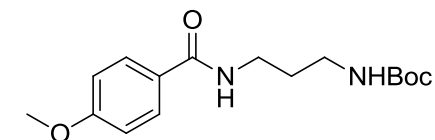

**4-methoxy-*N*-(4-nitrobenzyl)benzamide (42):** According to “General protocol for acyl transfer 1”: Thioester **17** (100 mg, 0.37 mmol), (4-nitrophenyl)methanamine hydrochloride (103 mg, 0.55 mmol). Flash column chromatography on silica gel (50% EtOAc in pentane as the eluant) afforded the title compound **42** (53 mg, 0.18 mmol, 51%) as a light-yellow solid.  $^1H$  NMR (400 MHz,  $CDCl_3$ )  $\delta$  (ppm) 8.13 (d,  $J$  = 8.8 Hz, 2H), 7.76 (d,  $J$  = 9.2 Hz, 2H), 7.45 (d,  $J$  = 8.8 Hz, 2H), 6.90 (d,  $J$  = 9.2 Hz, 2H), 6.70 (br t,  $J$  = 4.8 Hz, 1H), 4.69 (d,  $J$  = 6.4 Hz, 2H), 3.83 (s, 3H).  $^{13}C$  NMR (100 MHz,  $CDCl_3$ )  $\delta$  (ppm) 167.3, 162.7, 147.4, 146.4, 129.1 (2C), 128.4 (2C), 126.1, 124.1 (2C), 114.1 (2C), 55.7, 43.4. HRMS (ESI)  $m/z$  calcd for  $C_{15}H_{14}N_2O_4$   $[M+H]^+$ : 287.1026, found: 287.1029.  $R_f$  (50% EtOAc in pentane) = 0.34.

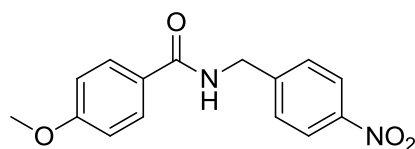

***N*-(*tert*-butyl)-4-methoxybenzamide (43):**<sup>16</sup> According to “General protocol for acyl transfer 1”: Thioester **17** (50 mg, 0.18 mmol), *tert*-butylamine (170  $\mu$ L, 1.6 mmol). Flash column chromatography on silica gel (20% EtOAc in pentane as the eluant) afforded the title compound **43** (23 mg, 0.11 mmol, 60%) as a colorless solid.  $^1H$  NMR (400 MHz,  $CDCl_3$ )  $\delta$  (ppm) 7.66 (d,  $J$  = 8.8 Hz, 2H), 6.87 (d,  $J$  = 8.8 Hz, 2H), 5.85 (br s, 1H), 3.81 (s, 3H), 1.44 (s, 9H).  $^{13}C$  NMR (100 MHz,  $CDCl_3$ )  $\delta$  (ppm) 166.6, 162.0, 128.6 (2C), 113.8 (2C), 55.6, 51.6, 29.1 (3C). HRMS (ESI)  $m/z$  calcd for  $C_{12}H_{17}NO_2$   $[M+H]^+$ : 208.1332, found: 208.1333.  $R_f$  (30% EtOAc in pentane) = 0.39.

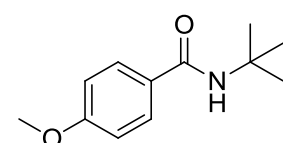

**(4-(cyclopropanecarbonyl)piperazin-1-yl)(4-((4-methoxyphenyl)thio)phenyl)methanone (44):** General procedure for acyl transfer 2: Thioester **36** (40 mg, 0.11 mmol),  $K_2CO_3$  (29 mg, 0.21 mmol), cyclopropyl(piperazin-1-yl)methanone (24 mg, 0.16 mmol) and DMF (1 mL) was stirred at rt in a 4 mL vial sealed with a PTFE-coated screw cap for 69 hours (over weekend).  $Et_2O$  (100 mL) was added to the reaction mixture and washed with 1 M HCl (2 x 10 mL) and brine (10 mL). The organic phase was dried

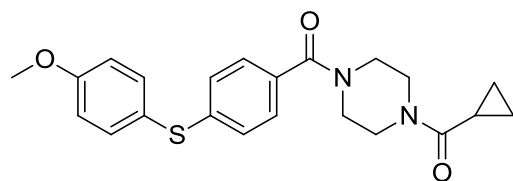

<sup>16</sup> Baum, J. C.; Milne, J. E.; Murry, J. A.; Thiel, O. R. *J. Org. Chem.*, **2009**, 74, 2207.

over Na<sub>2</sub>SO<sub>4</sub>, evaporated *in vacuo* and subjected to flash column chromatography on silica gel (70% EtOAc in pentane as the eluant) to obtain the title compound **44** (23 mg, 0.057 mmol, 55%) as a wax. <sup>1</sup>H NMR (400 MHz, CDCl<sub>3</sub>) δ (ppm) 7.43 (d, *J* = 8.8 Hz, 2H), 7.25 (d, *J* = 8.0 Hz, 2H), 7.10 (d, *J* = 8.4 Hz, 2H), 6.92 (d, *J* = 8.8 Hz, 2H), 3.82 (s, 3H), 3.78-3.42 (m, 8H), 1.75-1.66 (m, 1H), 1.01-0.96 (m, 2H), 0.81-0.73 (m, 2H). <sup>13</sup>C NMR (100 MHz, CDCl<sub>3</sub>) δ (ppm) 172.5, 170.5, 160.6, 142.7, 136.6 (2C), 132.0, 128.0 (2C), 127.0 (2C), 122.5, 115.5, 55.6, 11.2, 7.9. HRMS (ESI) *m/z* calcd for C<sub>22</sub>H<sub>24</sub>N<sub>2</sub>O<sub>3</sub>S [M+H<sup>+</sup>]: 397.1582, found: 397.1580 R<sub>f</sub> (70% EtOAc in pentane) = 0.20.

**4-((4-methoxyphenyl)thio)-*N*-(3-phenylprop-2-yn-1-yl)benzamide (45):** According to the “General conditions for acyl transfer 2”: Thioester **36** (40 mg, 0.11 mmol), K<sub>2</sub>CO<sub>3</sub> (44 mg, 0.32 mmol), 3-phenylprop-2-yn-1-amine (27 mg, 0.16 mmol) and DMF (1 mL) was stirred at rt for 25 h. Flash column chromatography

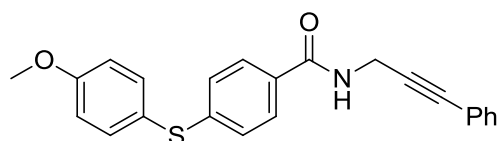

on silica gel (20% EtOAc in pentane as the eluant) afforded the title compound **45** (26 mg, 0.07 mmol, 66%) as a colorless solid. <sup>1</sup>H NMR (400 MHz, CDCl<sub>3</sub>) δ (ppm) 7.65 (d, *J* = 8.8 Hz, 2H), 7.45 (d, *J* = 8.8 Hz, 2H), 7.45-7.39 (m, 2H), 7.34-7.27 (m, 3H), 7.11 (d, *J* = 8.4 Hz, 2H), 6.94 (d, *J* = 8.8 Hz, 2H), 6.37 (br t, *J* = 4.8 Hz, 1H), 4.45 (d, *J* = 4.8 Hz, 2H), 3.84 (s, 3H). <sup>13</sup>C NMR (100 MHz, CDCl<sub>3</sub>) δ (ppm) 166.7, 160.7, 144.8, 136.7 (2C), 131.9 (2C), 130.7, 128.7, 128.5 (2C), 127.7 (2C), 126.7 (2C), 122.7, 122.2, 115.5 (2C), 84.9, 83.9, 55.6, 30.8. HRMS (ESI) *m/z* calcd for C<sub>23</sub>H<sub>19</sub>NO<sub>2</sub>S [M+H<sup>+</sup>]: 374.1209, found: 374.1205. R<sub>f</sub> (20% EtOAc in pentane) = 0.24.

## VIII. One-pot Procedure

***tert*-butyl (3-(4-((4-methoxyphenyl)thio)benzamido)propyl)carbamate (46):** The title compound

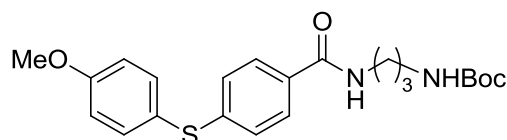

was prepared using the general procedure for the Thiocarbonylation-Arylation. **Chamber 1:** 1,2-diiodobenzene (83mg, 0.25 mmol), Pd(OAc)<sub>2</sub> (0.234 mL stock solution, 2.5 μmol), DPEphos (1.3 mg, 2.5 μmol) and NaOAc (45.1 mg, 0.55 mmol) was dissolved in DME (0.766 mL). **Chamber 2:** 3.0 equivalents of CO were generated in chamber 2. The glassware was then removed from the glovebox, and 2,4-dimethylthiophenol (68 μL, 0.50 mmol) was injected into chamber 1 before mixing at 85 °C. After 18 h, the reaction mixture from chamber 1 was transferred to a round bottomed flask and the solvent was removed *in vacuo*. The remaining solid was dissolved in 1:1TEA/pyridine (0.6 mL) and *N*-Boc-1,3-propanediamine (66 μL, 0.38 mmol) and mixed overnight at 70 °C. The reaction was cooled to rt, evaporated *in vacuo* and the desired compound was purified by flash chromatography on silica gel using pentane/EtOAc (3:1 to 1:1) as eluent. The title compound was isolated as a yellow oil (35 mg, 0.09 mmol, 34%). <sup>1</sup>H NMR (400 MHz, CDCl<sub>3</sub>) δ (ppm) 7.68 (d, *J* = 8.2 Hz, 2H), 7.44 (d, *J* = 8.8 Hz, 2H), 7.25 (br s, 1H), 7.11 (d, *J* = 8.5 Hz, 2H), 6.93 (d, *J* = 8.8 Hz, 2H), 4.95 (br s, 1H), 3.83 (s, 3H), 3.45 (q, *J* = 6.2 Hz, 2H), 3.20 (q, *J* = 6.2 Hz, 2H), 1.66 (pent, *J* = 5.8 Hz, 2H), 1.43 (s, 9H). <sup>13</sup>C NMR (100 MHz, CDCl<sub>3</sub>) δ (ppm) 166.9, 160.4, 157.0, 143.8, 136.3, 131.3, 127.5, 126.6, 122.4, 115.2, 79.5, 55.4, 37.0, 35.9, 30.2, 28.4. HRMS (ESI) *m/z* calcd for C<sub>22</sub>H<sub>28</sub>N<sub>2</sub>O<sub>4</sub>S [M+Na<sup>+</sup>]: 439.1667, found: 439.1669.

## IX. Synthesis of the Vortioxetine Analog

**S-(2,4-dimethylphenyl) 2-((2,4-dimethylphenyl)thio)benzothioate (47):** The title compound was prepared using the general procedure for the Thiocarbonylation-Arylation. **Chamber 1:** 1,2-diiodobenzene (83mg, 0.25 mmol), Pd(OAc)<sub>2</sub> (0.234 mL stock solution, 2.5 μmol), DPEphos (1.3 mg, 2.5 μmol) and NaOAc (45.1 mg, 0.55 mmol) was dissolved in DME (0.766 mL). **Chamber 2:** 3.0 equivalents of CO were generated in chamber 2. The glassware was then removed from the glovebox, and 2,4-dimethylthiophenol (68 μL, 0.50 mmol) was injected into chamber 1 before mixing at 85 °C. After 18 h, the solvent was removed from chamber 1 *in vacuo* and the desired compound was purified by flash chromatography on silica gel using pentane/CH<sub>2</sub>Cl<sub>2</sub> (3:1) as eluent. The title compound was isolated as pale yellow crystals (60 mg, 0.16 mmol, 64%). <sup>1</sup>H NMR (400 MHz, CDCl<sub>3</sub>) δ (ppm) 8.13 (dd, *J* = 7.7 Hz, *J* = 1.4 Hz, 1H), 7.42 (t, *J* = 7.6 Hz, 2H), 7.27-7.16 (m, 4H), 7.11-7.05 (m, 2H), 6.72 (dd, *J* = 8.1 Hz, *J* = 1.1 Hz, 1H), 2.43 (s, 3H), 2.37 (s, 3H), 2.37 (s, 3H), 2.31 (s, 3H). <sup>13</sup>C NMR (100 MHz, CDCl<sub>3</sub>) δ (ppm) 190.0, 142.7, 142.3, 140.8, 140.4, 139.9, 136.7, 136.4, 133.7, 132.3, 131.8, 131.7, 129.7, 128.0, 127.9, 127.5, 126.9, 124.1, 123.6, 21.3, 21.2, 20.8, 20.5. HRMS (ESI) *m/z* calcd for C<sub>23</sub>H<sub>22</sub>OS<sub>2</sub> [M+H<sup>+</sup>]: 379.1184, found: 379.1185.

**S-(2,4-dimethylphenyl) 2-((2,4-dimethylphenyl)thio)benzo[<sup>13</sup>C]thioate (<sup>13</sup>C-47):** The title compound was prepared using the general procedure for the Thiocarbonylation-Arylation. **Chamber 1:** 1,2-diiodobenzene (83mg, 0.25 mmol), Pd(OAc)<sub>2</sub> (0.234 mL stock solution, 2.5 μmol), DPEphos (1.3 mg, 2.5 μmol) and NaOAc (45.1 mg, 0.55 mmol) was dissolved in DME (0.766 mL). **Chamber 2:** 3.0 equivalents of <sup>13</sup>CO were generated in chamber 2. The glassware was then removed from the glovebox, and 2,4-dimethylthiophenol (68 μL, 0.50 mmol) was injected into chamber 1 before mixing at 85 °C. After 18 h, the solvent was removed from chamber 1 *in vacuo* and the desired compound was purified by flash chromatography on silica gel using pentane/CH<sub>2</sub>Cl<sub>2</sub> (3:1) as eluent. The title compound was isolated as pale yellow crystals (62 mg, 0.16 mmol, 65%). <sup>1</sup>H NMR (400 MHz, CDCl<sub>3</sub>) δ (ppm) 8.13 (ddd, *J* = 7.7 Hz, *J* = 5.5 Hz, *J* = 1.4 Hz, 1H), 7.43 (t, *J* = 7.5 Hz, 2H), 7.27-7.16 (m, 4H), 7.11-7.05 (m, 2H), 6.72 (dd, *J* = 8.0 Hz, *J* = 1.3 Hz, 1H), 2.43 (s, 3H), 2.37 (s, 3H), 2.37 (s, 3H), 2.31 (s, 3H). <sup>13</sup>C NMR (100 MHz, CDCl<sub>3</sub>) δ (ppm) 190.0 (<sup>13</sup>C), 142.7, 142.4, 140.8, 140.4, 139.9, 136.7, 136.4, 133.7 (d, *J* = 62 Hz), 132.3, 131.8, 131.7, 129.7 (d, *J* = 3.8 Hz), 128.0, 127.9, 127.5, 126.9 (d, *J* = 3.7 Hz), 124.1 (d, *J* = 4.7 Hz), 123.6 (d, *J* = 1.4 Hz), 21.3, 21.2, 20.8, 20.5. HRMS (ESI) *m/z* calcd for [<sup>13</sup>C]C<sub>22</sub>H<sub>22</sub>OS<sub>2</sub> [M+H<sup>+</sup>]: 380.1218, found: 380.1219.

**tert-butyl 4-(2-((2,4-dimethylphenyl)thio)benzoyl)piperazine-1-carboxylate (48):** S-(2,4-dimethylphenyl) 2-((2,4-dimethylphenyl)thio)benzothioate (**47**) (56 mg, 0.15 mmol), 1-Boc-piperazine (83 mg, 0.45 mmol) and K<sub>2</sub>CO<sub>3</sub> (83 mg, 0.60 mmol) was dissolved in DMF (1.0 mL) and stirred at 100 °C overnight. Thereafter the reaction was cooled to rt and H<sub>2</sub>O (20 mL) was added. The water phase was then extracted with Et<sub>2</sub>O (3 x 20 mL) and the combined organic phase was washed with brine and dried with MgSO<sub>4</sub>. The desired compound was purified by flash chromatography on silica gel using Pentane/EtOAc (3:1) as eluent. The title compound was isolated as a clear oil (45 mg, 0.10 mmol, 70%). <sup>1</sup>H NMR (400 MHz, CDCl<sub>3</sub>) δ (ppm) 7.29 (d, *J* = 7.8 Hz, 1H), 7.20-7.14 (m, 3H), 7.10 (br s, 1H), 6.99 (d, *J* = 7.9 Hz, 1H), 6.81-6.79 (m, 1H), 3.78 (br s, 2H), 3.53 (t, *J* = 5.2 Hz, 2H), 3.42 (br s, 2H), 3.26 (br s, 2H), 2.31 (s, 3H), 2.30 (s, 3H), 1.45 (s, 9H). <sup>13</sup>C NMR (100 MHz, CDCl<sub>3</sub>) δ (ppm) 168.5, 154.5, 141.3, 139.2, 135.2, 134.9, 131.8, 129.6, 128.2, 127.8, 127.6, 126.7, 125.8, 80.3, 46.8, 41.5, 28.4, 21.1, 20.6. HRMS (ESI) *m/z* calcd for C<sub>24</sub>H<sub>30</sub>N<sub>2</sub>O<sub>3</sub>S [M+H<sup>+</sup>]: 427.2050, found: 427.2051.

**tert-butyl 4-(2-((2,4-dimethylphenyl)thio)[<sup>13</sup>C]benzoyl)piperazine-1-carboxylate (<sup>13</sup>C-48):** *S*-(2,4-dimethylphenyl) 2-((2,4-dimethylphenyl)thio)benzo[<sup>13</sup>C]thioate (<sup>13</sup>C-47) (58 mg, 0.15 mmol), 1-Boc-piperazine (86 mg, 0.45 mmol) and K<sub>2</sub>CO<sub>3</sub> (85 mg, 0.60 mmol) was dissolved in DMF (1.0 mL) and stirred at 100 °C overnight. Thereafter the reaction was cooled to rt and H<sub>2</sub>O (20 mL) was added. The water phase was then extracted with Et<sub>2</sub>O (3 x 20 mL) and the combined organic phase was washed with brine and dried with MgSO<sub>4</sub>. The desired compound was purified by flash chromatography on silica gel using Pentane/EtOAc (3:1) as eluent. The title compound was isolated as a clear oil (46 mg, 0.11 mmol, 70%). <sup>1</sup>H NMR (400 MHz, CDCl<sub>3</sub>) δ (ppm) 7.29 (d, *J* = 7.8 Hz, 1H), 7.20-7.14 (m, 3H), 7.10 (br s, 1H), 6.99 (dd, *J* = 7.9 Hz, *J* = 1.4 Hz, 1H), 6.81-6.79 (m, 1H), 3.78 (br s, 2H), 3.53 (t, *J* = 4.8 Hz, 2H), 3.43 (br s, 2H), 3.27 (br s, 2H), 2.33 (s, 3H), 2.31 (s, 3H), 1.46 (s, 9H). <sup>13</sup>C NMR (100 MHz, CDCl<sub>3</sub>) δ (ppm) 168.6 (<sup>13</sup>C), 154.5, 141.4, 139.3, 135.2, 134.9, 131.8, 129.6, 128.1 (d, *J* = 2.1 Hz), 127.8, 127.6, 126.7 (d, *J* = 1.3 Hz), 125.8 (d, *J* = 4.0 Hz), 80.3, 46.8, 41.5, 28.4, 21.1, 20.7. HRMS (ESI) *m/z* calcd for [<sup>13</sup>C]<sub>23</sub>H<sub>30</sub>N<sub>2</sub>O<sub>2</sub>S [M+H<sup>+</sup>]: 428.2083, found: 428.2087.

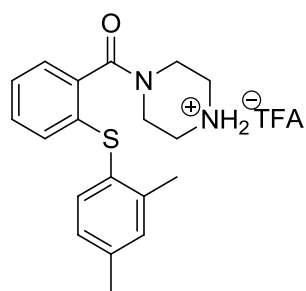

**4-(2-((2,4-dimethylphenyl)thio)benzoyl)piperazin-1-ium trifluoroacetate (49):** *tert*-butyl 4-(2-((2,4-dimethylphenyl)thio)benzoyl)piperazine-1-carboxylate (**48**) (46 mg, 0.11 mmol) was dissolved in dry CH<sub>2</sub>Cl<sub>2</sub> (1.4 mL) under an argon atmosphere followed by addition of TFA (0.14 mL). The reaction mixture was stirred at rt for 3 h, where after the solvent was evaporated. TFA was removed by evaporation of the compound with CH<sub>2</sub>Cl<sub>2</sub> several times giving the crude product (45 mg, 0.11 mmol, 100%). <sup>1</sup>H NMR (400 MHz, CDCl<sub>3</sub>) δ (ppm) 7.29-7.18 (m, 4H), 7.13 (br s, 1H), 7.01 (d, *J* = 7.5 Hz, 1H), 6.83 (d, *J* = 8.1 Hz, 1H), 4.13 (br s, 2H), 3.66 (br s, 2H), 3.32 (br s, 2H), 3.24 (br s, 2H), 2.35 (s, 3H), 2.31 (s, 3H). <sup>13</sup>C NMR (100 MHz, CDCl<sub>3</sub>) δ (ppm) 168.4, 141.4, 139.7, 135.2, 135.1, 133.8, 131.9, 130.2, 128.2, 128.0, 126.9, 126.8, 126.0, 43.5, 38.4, 21.1, 20.6. <sup>19</sup>F NMR (377 MHz, CDCl<sub>3</sub>) δ (ppm) -75.65. HRMS (ESI) *m/z* calcd for C<sub>19</sub>H<sub>23</sub>N<sub>2</sub>OS [M<sup>+</sup>]: 327.1526, found: 327.1525. The amine protons were exchanged with deuterium atoms. Grease impurities were detected in the <sup>1</sup>H NMR.

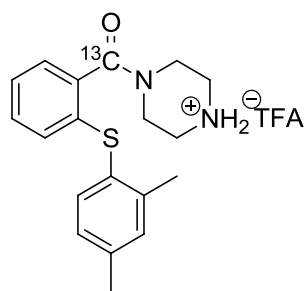

**4-(2-((2,4-dimethylphenyl)thio)[<sup>13</sup>C]benzoyl)piperazin-1-ium trifluoroacetate (<sup>13</sup>C-49):** *tert*-butyl 4-(2-((2,4-dimethylphenyl)thio)[<sup>13</sup>C]benzoyl)piperazine-1-carboxylate (<sup>13</sup>C-48) (46 mg, 0.11 mmol) was dissolved in dry CH<sub>2</sub>Cl<sub>2</sub> (1.4 mL) under an argon atmosphere followed by addition of TFA (0.14 mL). The reaction mixture was stirred at rt for 3 h, where after the solvent was evaporated. TFA was removed by evaporation of the compound with CH<sub>2</sub>Cl<sub>2</sub> several times giving the crude product (43 mg, 0.10 mmol, 95%). <sup>1</sup>H NMR (400 MHz, CDCl<sub>3</sub>) δ (ppm) 9.31 (br s, 2H), 7.24-7.19 (m, 4H), 7.11 (br s, 1H), 6.99 (d, *J* = 7.8 Hz, 1H), 6.85 (d, *J* = 7.6 Hz, 1H), 4.05 (br s, 2H), 3.56 (br s, 2H), 3.29 (br s, 2H), 3.20 (br s, 2H), 2.32 (s, 3H), 2.27 (s, 3H). <sup>13</sup>C NMR (100 MHz, CDCl<sub>3</sub>) δ (ppm) 168.8 (<sup>13</sup>C), 141.2, 139.7, 135.0, 134.9, 133.5 (d, *J* = 67.0 Hz), 132.0, 130.4, 128.5 (d, *J* = 3.2 Hz), 128.0, 126.78, 126.76, 126.2 (d, *J* = 4.0 Hz), 43.6, 38.4, 21.1, 20.5. <sup>19</sup>F NMR (377 MHz, CDCl<sub>3</sub>) δ (ppm) -75.90. HRMS (ESI) *m/z* calcd for [<sup>13</sup>C]<sub>18</sub>H<sub>23</sub>N<sub>2</sub>O<sub>2</sub>S [M<sup>+</sup>]: 328.1559, found: 328.1568.

## X. Spectral Data

### S-Phenyl 4-methoxybenzoate (1)

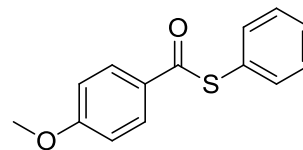

| Parameter                 | Value               |
|---------------------------|---------------------|
| 1 Title                   | MNB163_F11-28_H     |
| 2 Origin                  | mercury             |
| 3 Owner                   |                     |
| 4 Solvent                 | cdcl3               |
| 5 Pulse Sequence          | s2pul               |
| 6 Acquisition Date        | 2011-10-17T14:35:32 |
| 7 Modification Date       |                     |
| 8 Temperature             | 25.0                |
| 9 Number of Scans         | 8                   |
| 10 Spectrometer Frequency | 400.46              |
| 11 Spectral Width         | 6406.1              |
| 12 Lowest Frequency       | -799.5              |
| 13 Nucleus                | 1H                  |
| 14 Acquired Size          | 16384               |
| 15 Spectral Size          | 32768               |

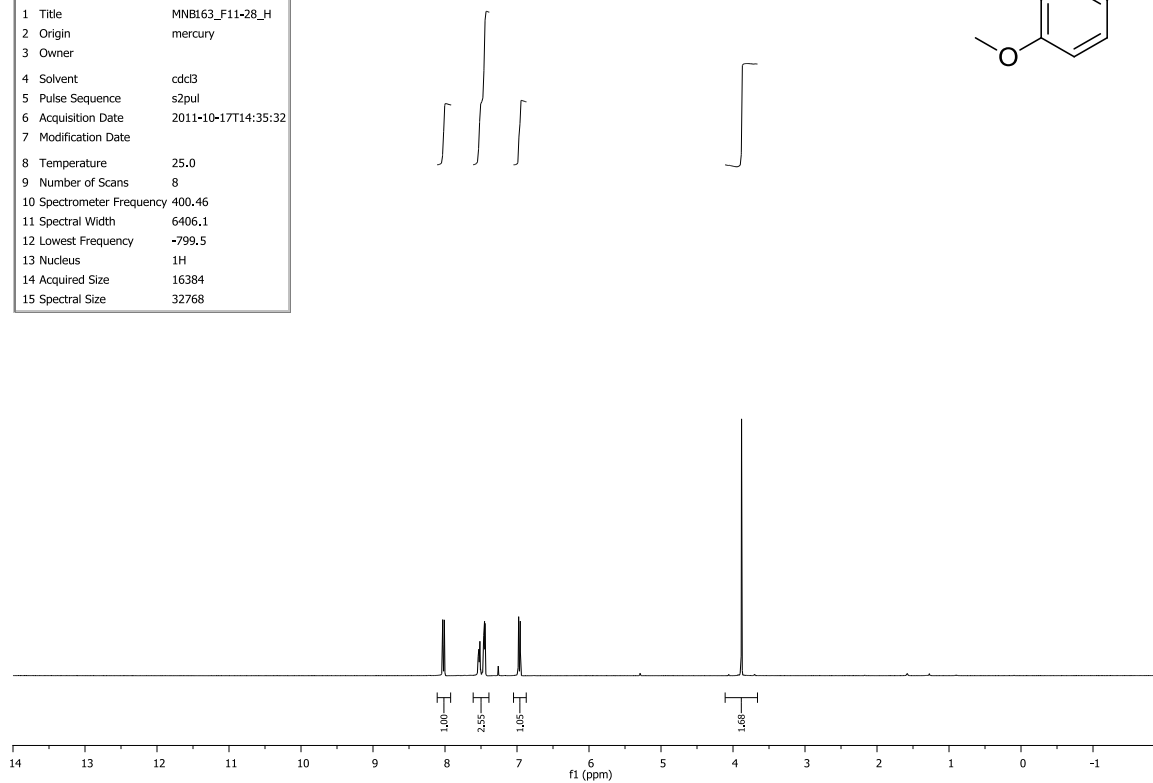

| Parameter                 | Value               |
|---------------------------|---------------------|
| 1 Title                   | MNB145_F11-27_C     |
| 2 Origin                  | mercury             |
| 3 Owner                   |                     |
| 4 Solvent                 | cdcl3               |
| 5 Pulse Sequence          | s2pul               |
| 6 Acquisition Date        | 2011-09-13T09:58:18 |
| 7 Modification Date       |                     |
| 8 Temperature             | 25.0                |
| 9 Number of Scans         | 168                 |
| 10 Spectrometer Frequency | 100.71              |
| 11 Spectral Width         | 25188.9             |
| 12 Lowest Frequency       | -1517.9             |
| 13 Nucleus                | 13C                 |
| 14 Acquired Size          | 32768               |
| 15 Spectral Size          | 65536               |

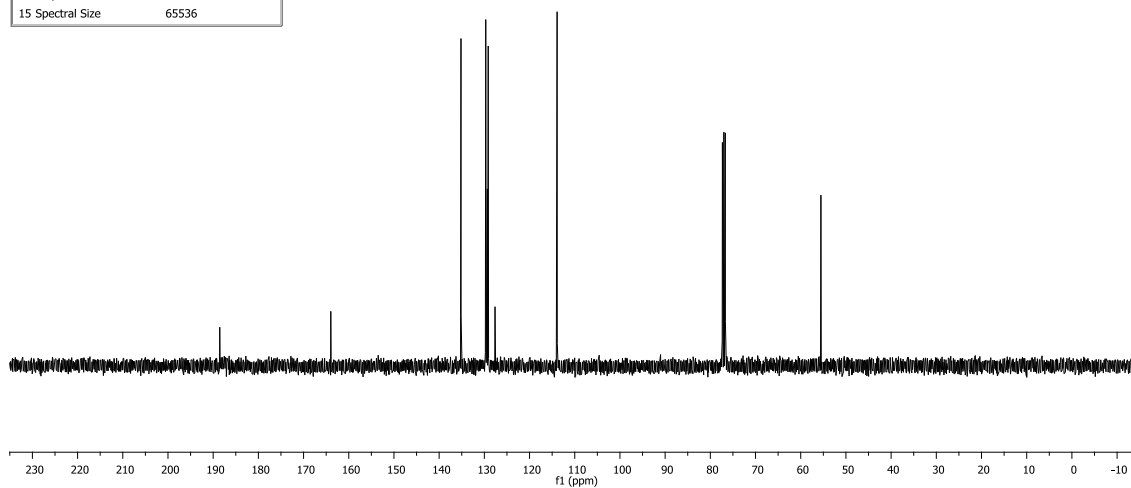

### S-Phenyl 3-methoxybenzothioate (3)

| Parameter                 | Value               |
|---------------------------|---------------------|
| 1 Title                   | MNB177.F9-27.H      |
| 2 Origin                  | mercury             |
| 3 Owner                   |                     |
| 4 Solvent                 | cdc13               |
| 5 Pulse Sequence          | s2pul               |
| 6 Acquisition Date        | 2011-11-04T08:58:52 |
| 7 Modification Date       |                     |
| 8 Temperature             | 25.0                |
| 9 Number of Scans         | 8                   |
| 10 Spectrometer Frequency | 400.46              |
| 11 Spectral Width         | 6406.1              |
| 12 Lowest Frequency       | -800.3              |
| 13 Nucleus                | 1H                  |
| 14 Acquired Size          | 16384               |
| 15 Spectral Size          | 32768               |

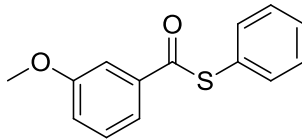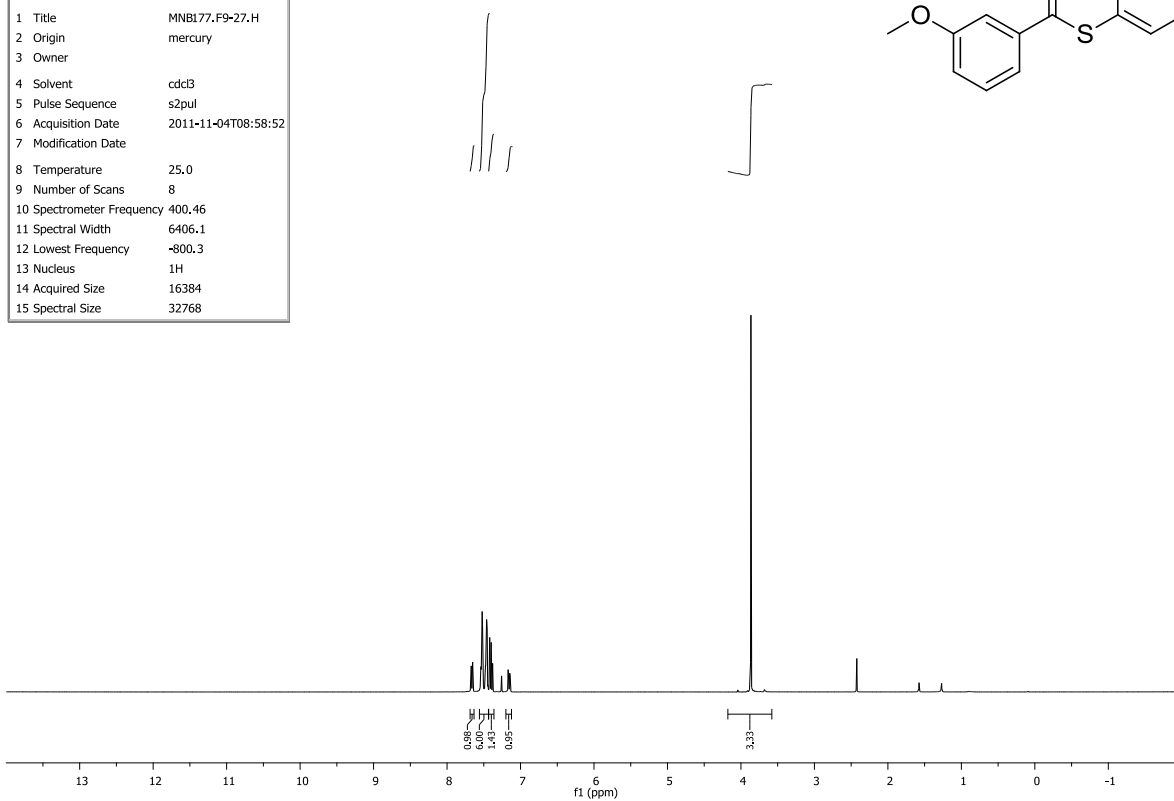

|    | Parameter              | Value               |
|----|------------------------|---------------------|
| 1  | Title                  | MNB177_F9-27_C      |
| 2  | Origin                 | mercury             |
| 3  | Owner                  |                     |
| 4  | Solvent                | cdc13               |
| 5  | Pulse Sequence         | s2pul               |
| 6  | Acquisition Date       | 2011-11-04T08:59:37 |
| 7  | Modification Date      |                     |
| 8  | Temperature            | 25.0                |
| 9  | Number of Scans        | 392                 |
| 10 | Spectrometer Frequency | 100.71              |
| 11 | Spectral Width         | 25188.9             |
| 12 | Lowest Frequency       | -1517.9             |
| 13 | Nucleus                | 13C                 |
| 14 | Acquired Size          | 32768               |
| 15 | Spectral Size          | 65536               |

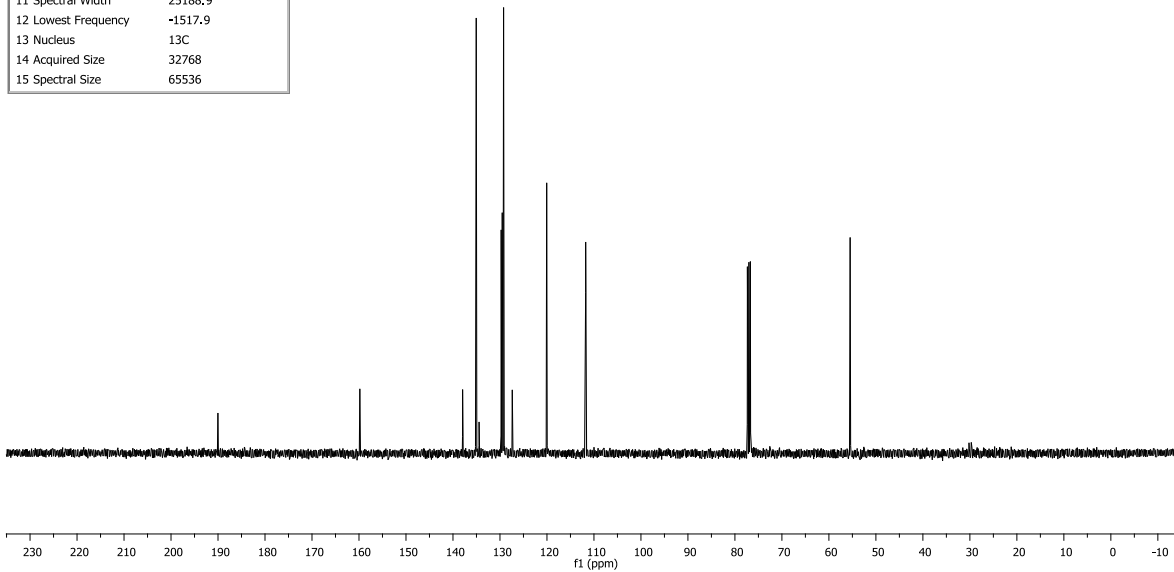

## S-Phenyl 2-methoxybenzothioate (4)

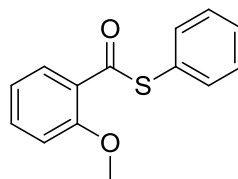

| Parameter                 | Value               |
|---------------------------|---------------------|
| 1 Title                   | MNBL76.F13-35.H     |
| 2 Origin                  | mercury             |
| 3 Owner                   |                     |
| 4 Solvent                 | cdcl3               |
| 5 Pulse Sequence          | s2pul               |
| 6 Acquisition Date        | 2011-11-03T15:36:26 |
| 7 Modification Date       |                     |
| 8 Temperature             | 25.0                |
| 9 Number of Scans         | 8                   |
| 10 Spectrometer Frequency | 400.46              |
| 11 Spectral Width         | 6406.1              |
| 12 Lowest Frequency       | ~800.3              |
| 13 Nucleus                | <sup>1</sup> H      |
| 14 Acquired Size          | 16384               |
| 15 Spectral Size          | 32768               |

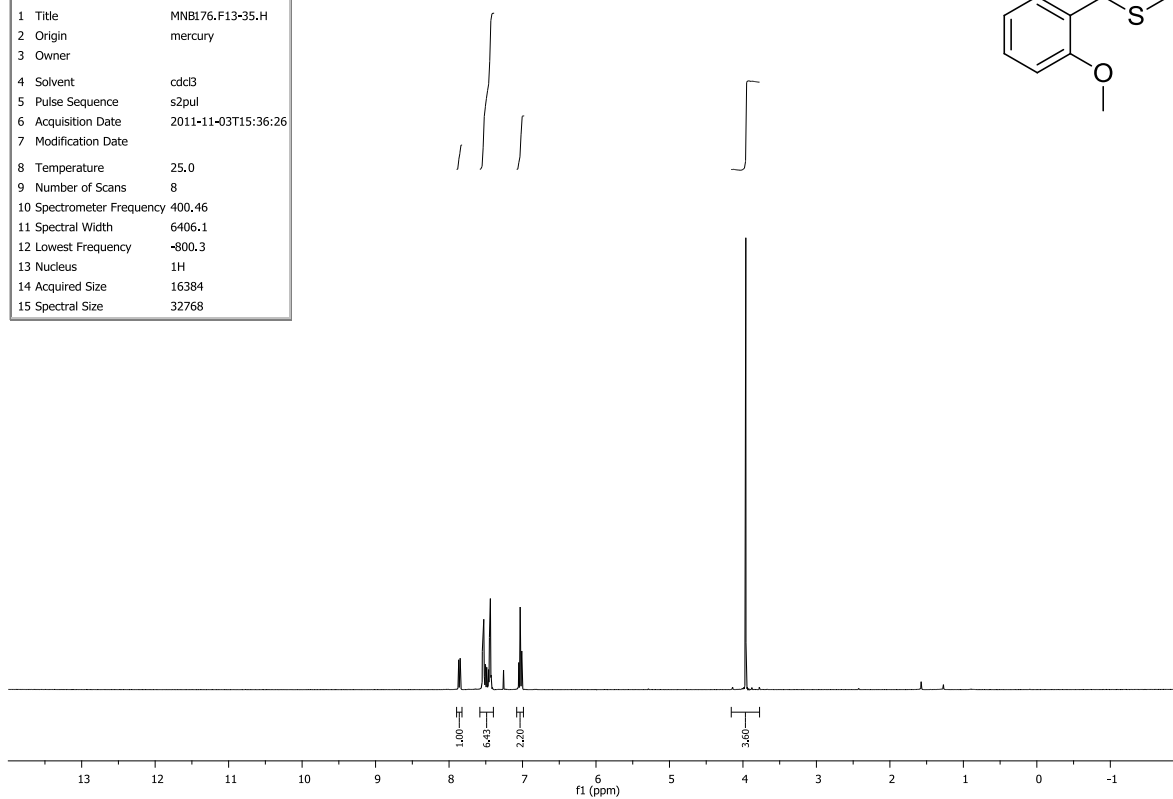

| Parameter                 | Value               |
|---------------------------|---------------------|
| 1 Title                   | MNBL76.F13-35.C     |
| 2 Origin                  | mercury             |
| 3 Owner                   |                     |
| 4 Solvent                 | cdcl3               |
| 5 Pulse Sequence          | s2pul               |
| 6 Acquisition Date        | 2011-11-03T15:37:09 |
| 7 Modification Date       |                     |
| 8 Temperature             | 25.0                |
| 9 Number of Scans         | 228                 |
| 10 Spectrometer Frequency | 100.71              |
| 11 Spectral Width         | 25188.9             |
| 12 Lowest Frequency       | ~1517.9             |
| 13 Nucleus                | <sup>13</sup> C     |
| 14 Acquired Size          | 32768               |
| 15 Spectral Size          | 65536               |

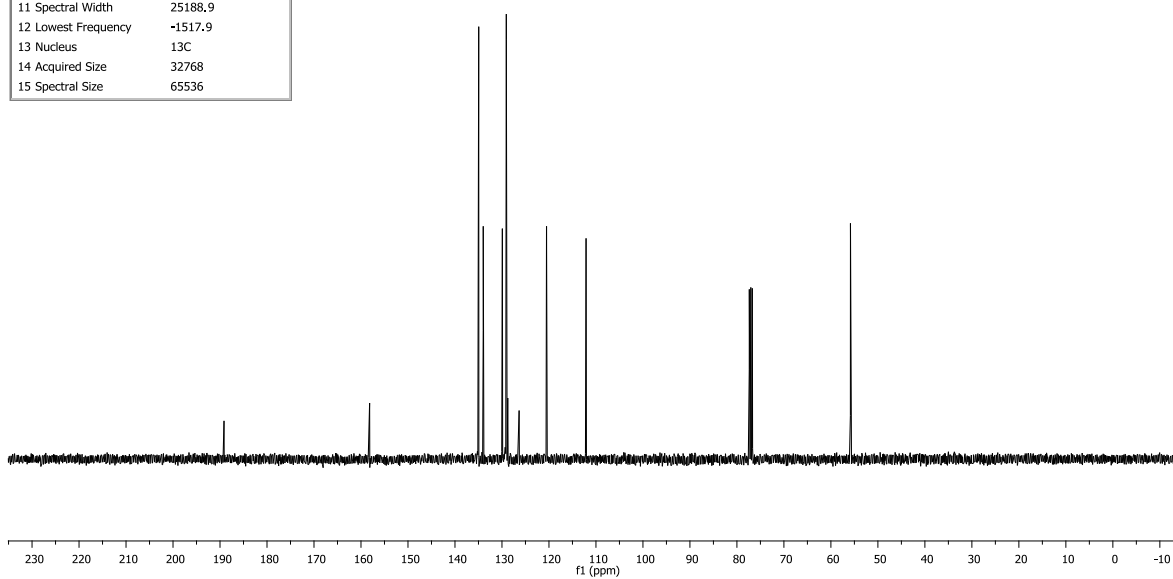

### ***S*-Phenyl 3,4-dimethoxybenzothioate (5)**

| Parameter                 | Value               |
|---------------------------|---------------------|
| 1 Title                   | MNB186.F14-28.H     |
| 2 Origin                  | mercury             |
| 3 Owner                   |                     |
| 4 Solvent                 | cdcl3               |
| 5 Pulse Sequence          | s2pul               |
| 6 Acquisition Date        | 2011-11-22T11:26:59 |
| 7 Modification Date       |                     |
| 8 Temperature             | 25.0                |
| 9 Number of Scans         | 8                   |
| 10 Spectrometer Frequency | 400.46              |
| 11 Spectral Width         | 6406.1              |
| 12 Lowest Frequency       | -800.3              |
| 13 Nucleus                | 1H                  |
| 14 Acquired Size          | 16384               |
| 15 Spectral Size          | 32768               |

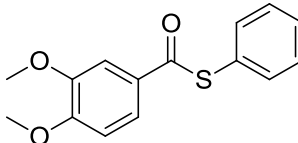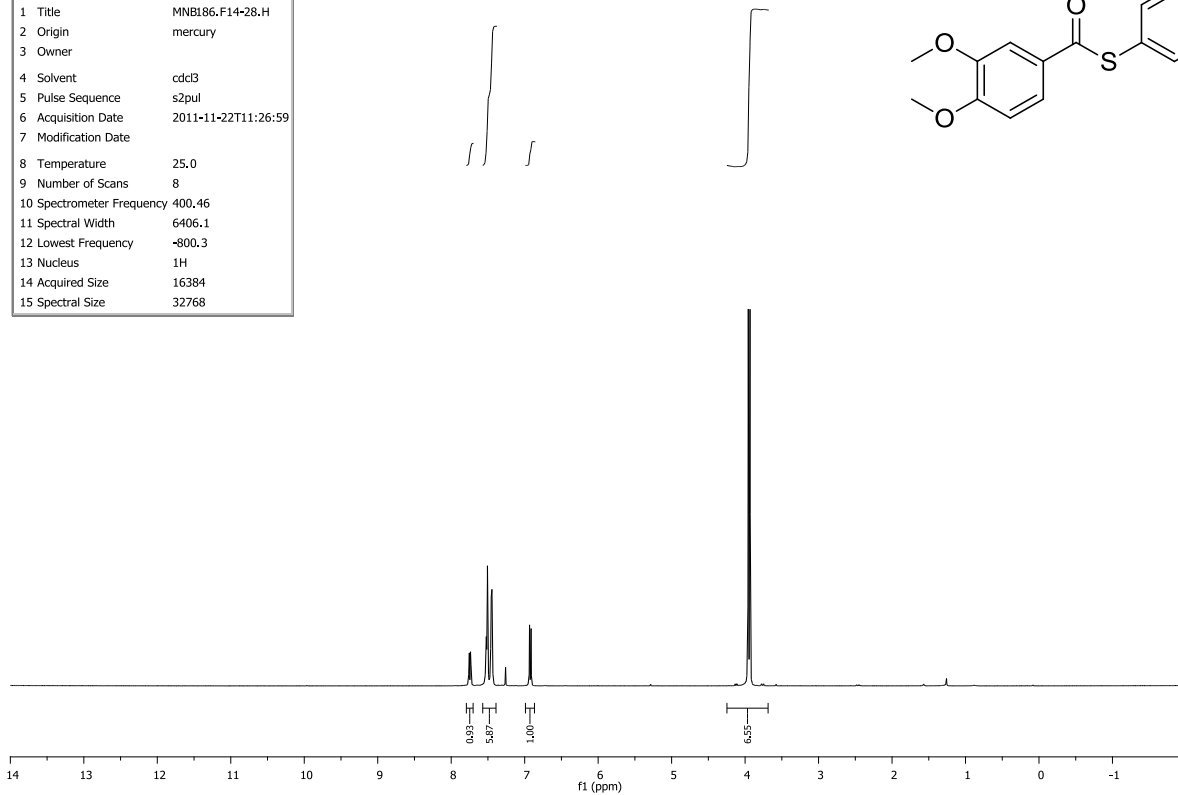

| Parameter                 | Value               |
|---------------------------|---------------------|
| 1 Title                   | MNBI86_F14-28.C     |
| 2 Origin                  | mercury             |
| 3 Owner                   |                     |
| 4 Solvent                 | cdcl3               |
| 5 Pulse Sequence          | s2pul               |
| 6 Acquisition Date        | 2011-11-22T11:37:48 |
| 7 Modification Date       |                     |
| 8 Temperature             | 25.0                |
| 9 Number of Scans         | 256                 |
| 10 Spectrometer Frequency | 100.71              |
| 11 Spectral Width         | 25188.9             |
| 12 Lowest Frequency       | -1517.9             |
| 13 Nucleus                | <sup>13</sup> C     |
| 14 Acquired Size          | 32768               |
| 15 Spectral Size          | 65536               |

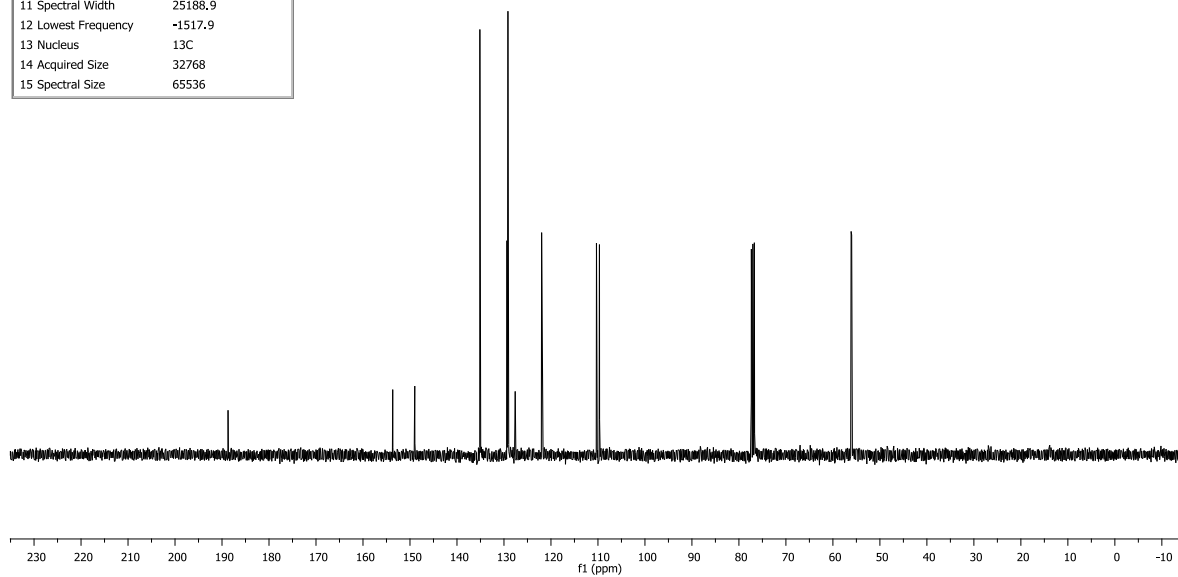

## S-Phenyl 2,4-dimethoxybenzothioate (6)

| Parameter                 | Value               |
|---------------------------|---------------------|
| 1 Title                   | MNBI84.F7-20.H2     |
| 2 Origin                  | mercury             |
| 3 Owner                   |                     |
| 4 Solvent                 | cdcl3               |
| 5 Pulse Sequence          | s2pul               |
| 6 Acquisition Date        | 2011-11-22T11:24:04 |
| 7 Modification Date       |                     |
| 8 Temperature             | 25.0                |
| 9 Number of Scans         | 8                   |
| 10 Spectrometer Frequency | 400.46              |
| 11 Spectral Width         | 6406.1              |
| 12 Lowest Frequency       | ~800.3              |
| 13 Nucleus                | <sup>1</sup> H      |
| 14 Acquired Size          | 16384               |
| 15 Spectral Size          | 32768               |

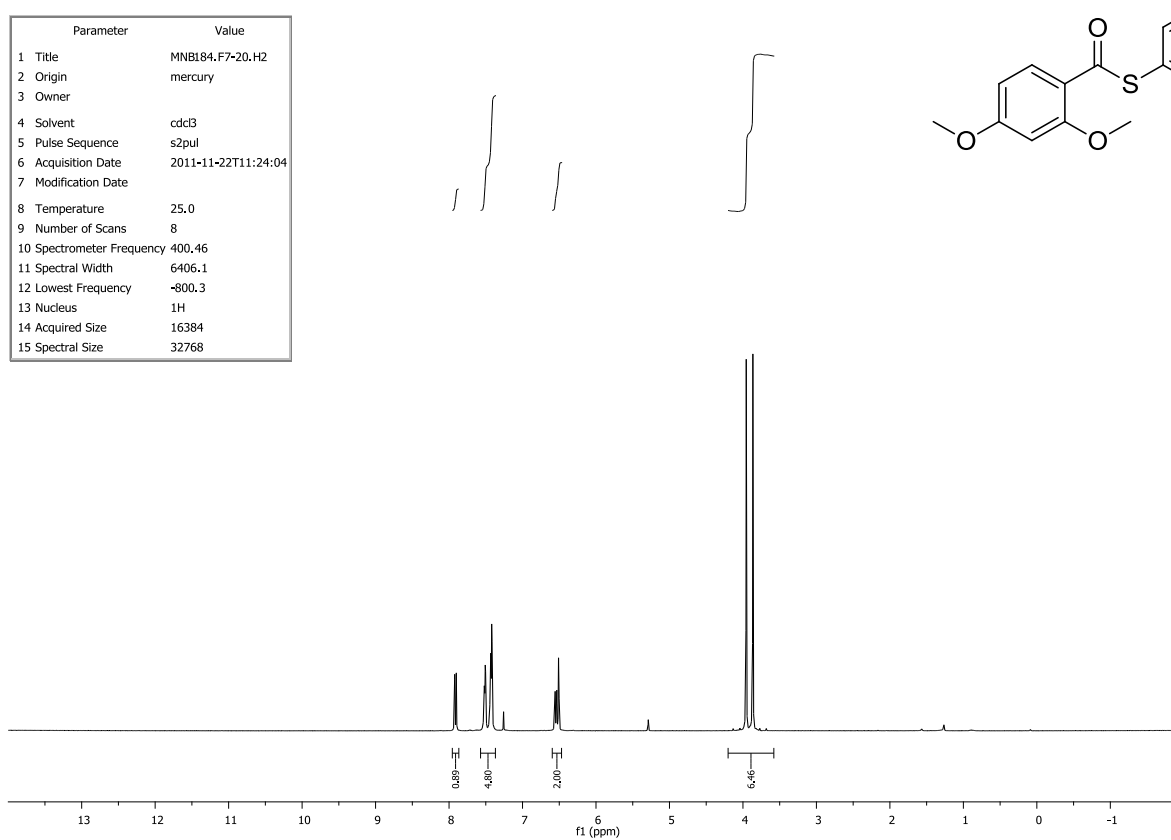

| Parameter                 | Value               |
|---------------------------|---------------------|
| 1 Title                   | MNBI84_F7-20_C2     |
| 2 Origin                  | mercury             |
| 3 Owner                   |                     |
| 4 Solvent                 | cdcl3               |
| 5 Pulse Sequence          | s2pul               |
| 6 Acquisition Date        | 2011-11-21T13:39:23 |
| 7 Modification Date       |                     |
| 8 Temperature             | 25.0                |
| 9 Number of Scans         | 456                 |
| 10 Spectrometer Frequency | 100.71              |
| 11 Spectral Width         | 25188.9             |
| 12 Lowest Frequency       | ~1517.9             |
| 13 Nucleus                | <sup>13</sup> C     |
| 14 Acquired Size          | 32768               |
| 15 Spectral Size          | 65536               |

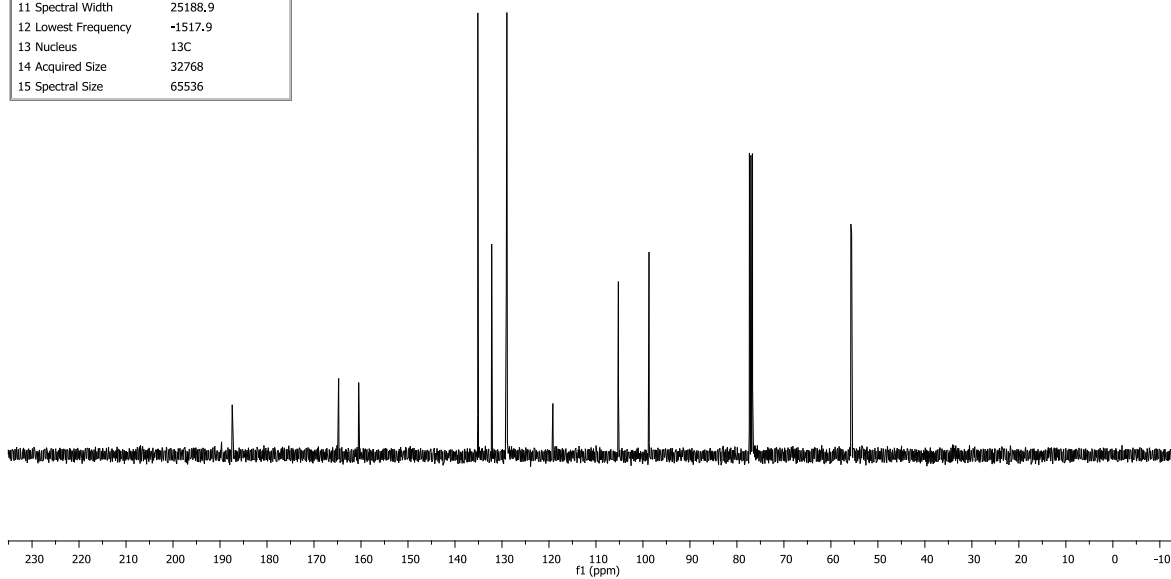

## S-Phenyl 3,4,5-trimethoxybenzothioate (7)

| Parameter                 | Value                 |
|---------------------------|-----------------------|
| 1 Title                   | MNBI82.F42-44.H+CHCl3 |
| 2 Origin                  | mercury               |
| 3 Owner                   |                       |
| 4 Solvent                 | cdcl3                 |
| 5 Pulse Sequence          | s2pul                 |
| 6 Acquisition Date        | 2011-11-09T14:19:43   |
| 7 Modification Date       |                       |
| 8 Temperature             | 25.0                  |
| 9 Number of Scans         | 8                     |
| 10 Spectrometer Frequency | 400.46                |
| 11 Spectral Width         | 6406.1                |
| 12 Lowest Frequency       | -800.3                |
| 13 Nucleus                | 1H                    |
| 14 Acquired Size          | 16384                 |
| 15 Spectral Size          | 32768                 |

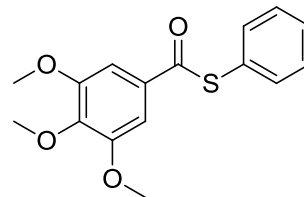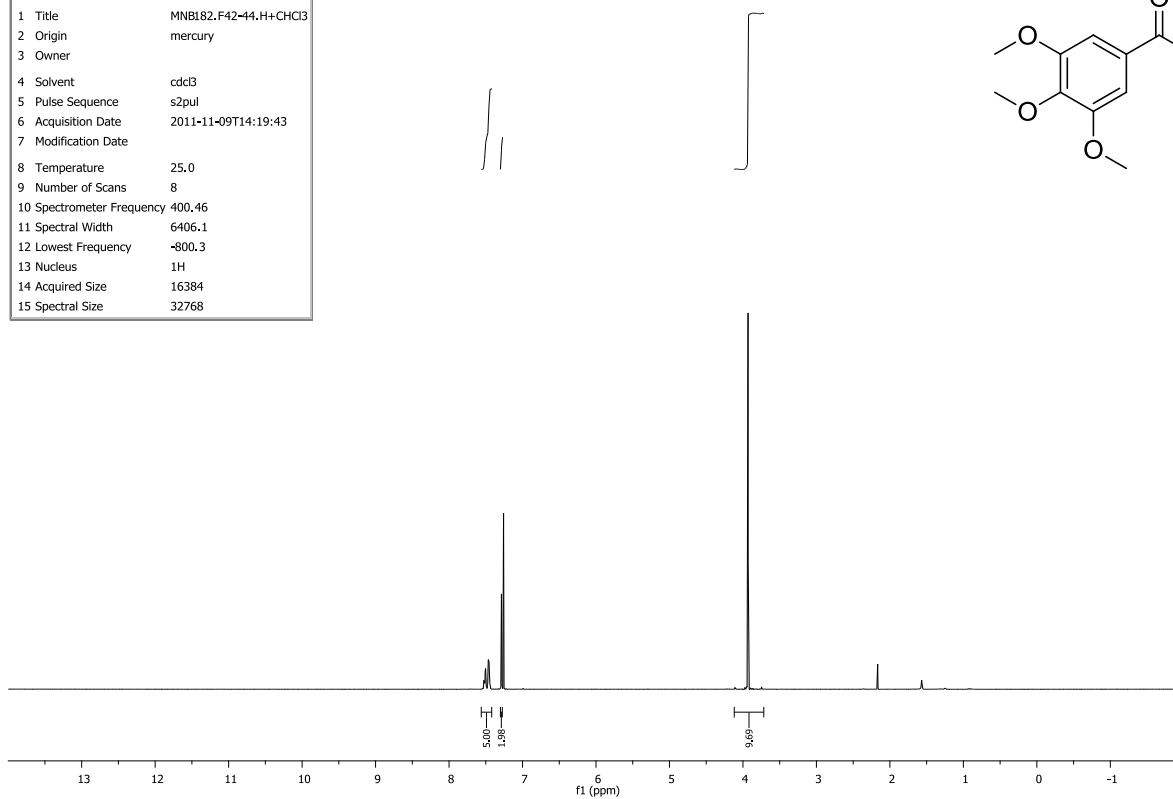

| Parameter                 | Value               |
|---------------------------|---------------------|
| 1 Title                   | MNBI82.F28-41.C     |
| 2 Origin                  | mercury             |
| 3 Owner                   |                     |
| 4 Solvent                 | cdcl3               |
| 5 Pulse Sequence          | s2pul               |
| 6 Acquisition Date        | 2011-11-04T13:37:23 |
| 7 Modification Date       |                     |
| 8 Temperature             | 25.0                |
| 9 Number of Scans         | 256                 |
| 10 Spectrometer Frequency | 100.71              |
| 11 Spectral Width         | 25188.9             |
| 12 Lowest Frequency       | -1517.9             |
| 13 Nucleus                | 13C                 |
| 14 Acquired Size          | 32768               |
| 15 Spectral Size          | 65536               |

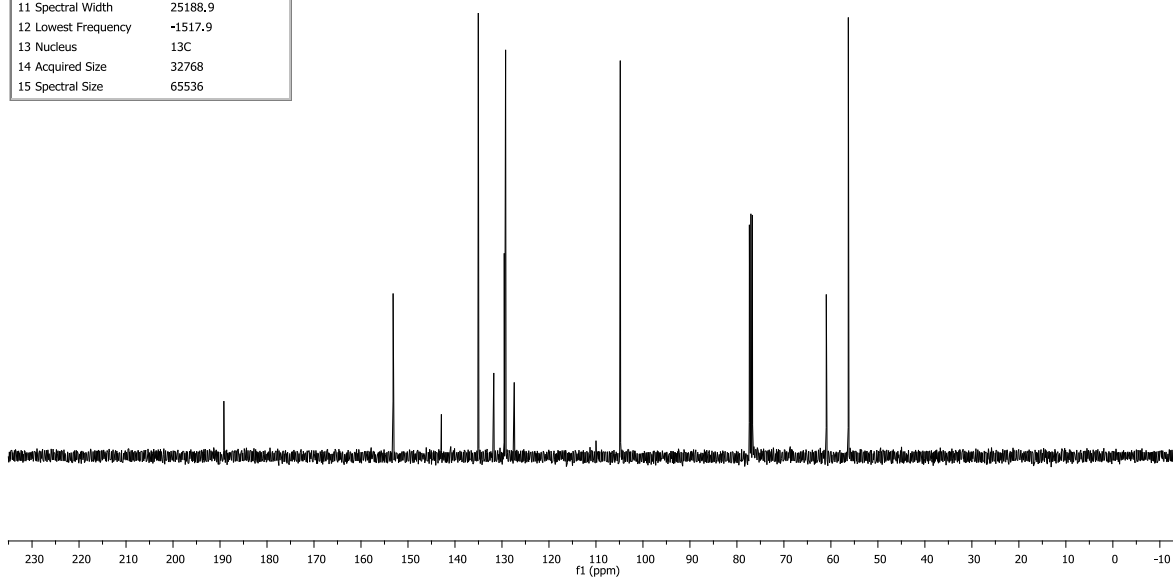

# **S-Phenyl 4-((*tert*-butoxycarbonyl)(methyl)amino)benzothioate (8)**

| Parameter                 | Value               |
|---------------------------|---------------------|
| 1 Title                   | MNBI69.F11-24.H     |
| 2 Origin                  | mercury             |
| 3 Owner                   |                     |
| 4 Solvent                 | cdcl3               |
| 5 Pulse Sequence          | s2pul               |
| 6 Acquisition Date        | 2011-11-01T12:53:23 |
| 7 Modification Date       |                     |
| 8 Temperature             | 25.0                |
| 9 Number of Scans         | 8                   |
| 10 Spectrometer Frequency | 400.46              |
| 11 Spectral Width         | 6406.1              |
| 12 Lowest Frequency       | -800.3              |
| 13 Nucleus                | <sup>1</sup> H      |
| 14 Acquired Size          | 16384               |
| 15 Spectral Size          | 32768               |

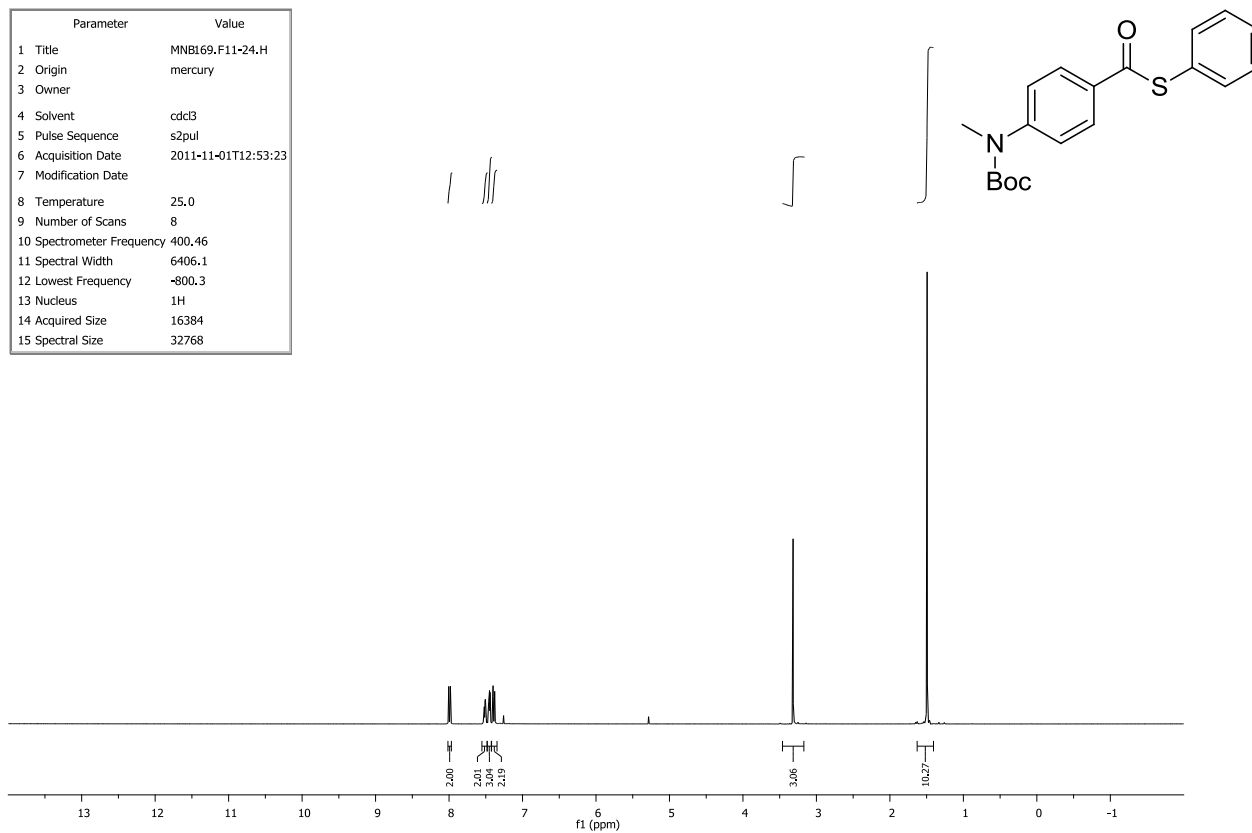

| Parameter                 | Value               |
|---------------------------|---------------------|
| 1 Title                   | MNBI69.F11-24.C     |
| 2 Origin                  | mercury             |
| 3 Owner                   |                     |
| 4 Solvent                 | cdcl3               |
| 5 Pulse Sequence          | s2pul               |
| 6 Acquisition Date        | 2011-11-01T13:03:57 |
| 7 Modification Date       |                     |
| 8 Temperature             | 25.0                |
| 9 Number of Scans         | 256                 |
| 10 Spectrometer Frequency | 100.71              |
| 11 Spectral Width         | 25188.9             |
| 12 Lowest Frequency       | -1517.9             |
| 13 Nucleus                | <sup>13</sup> C     |
| 14 Acquired Size          | 32768               |
| 15 Spectral Size          | 65536               |

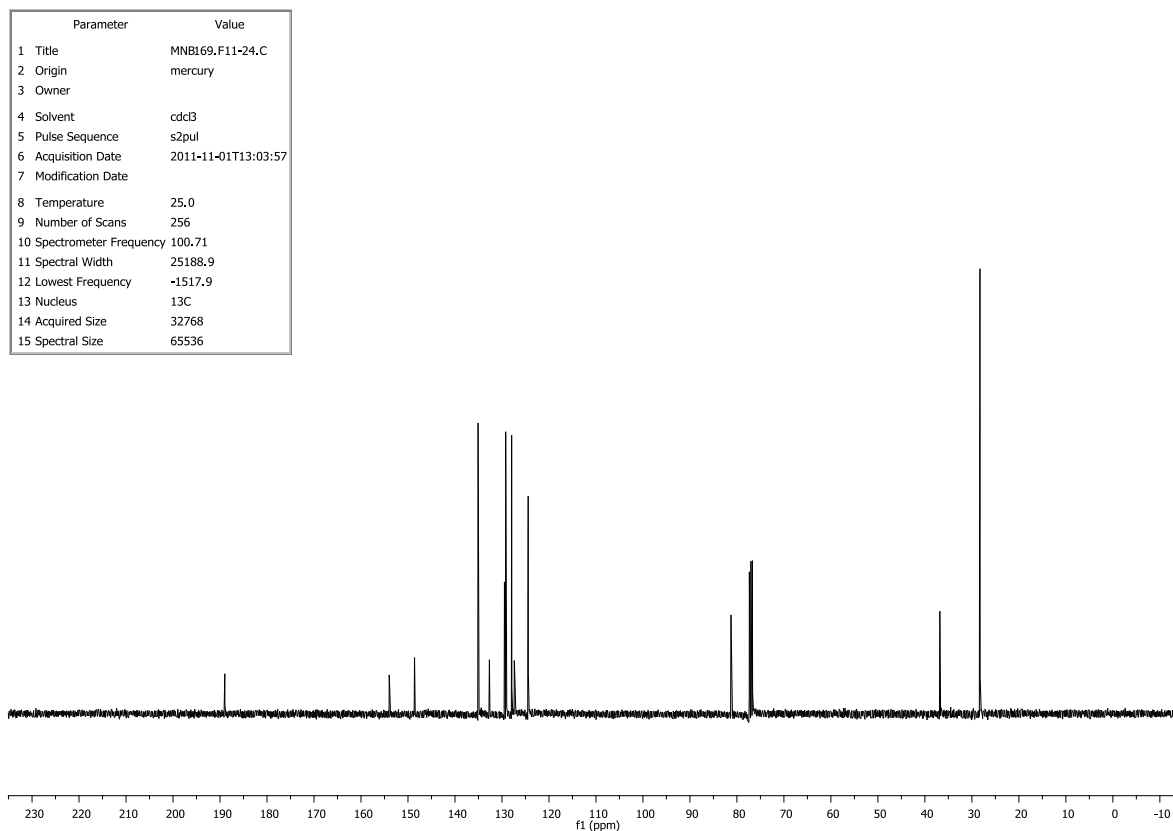

## S-Phenyl benzothioate (9)

| Parameter                 | Value               |
|---------------------------|---------------------|
| 1 Title                   | MNBI65.F5-9.H       |
| 2 Origin                  | mercury             |
| 3 Owner                   |                     |
| 4 Solvent                 | cdcl3               |
| 5 Pulse Sequence          | s2pul               |
| 6 Acquisition Date        | 2011-10-19T14:09:51 |
| 7 Modification Date       |                     |
| 8 Temperature             | 25.0                |
| 9 Number of Scans         | 8                   |
| 10 Spectrometer Frequency | 400.46              |
| 11 Spectral Width         | 6406.1              |
| 12 Lowest Frequency       | -800.3              |
| 13 Nucleus                | <sup>1</sup> H      |
| 14 Acquired Size          | 16384               |
| 15 Spectral Size          | 32768               |

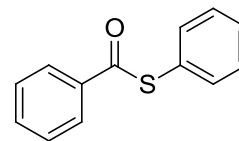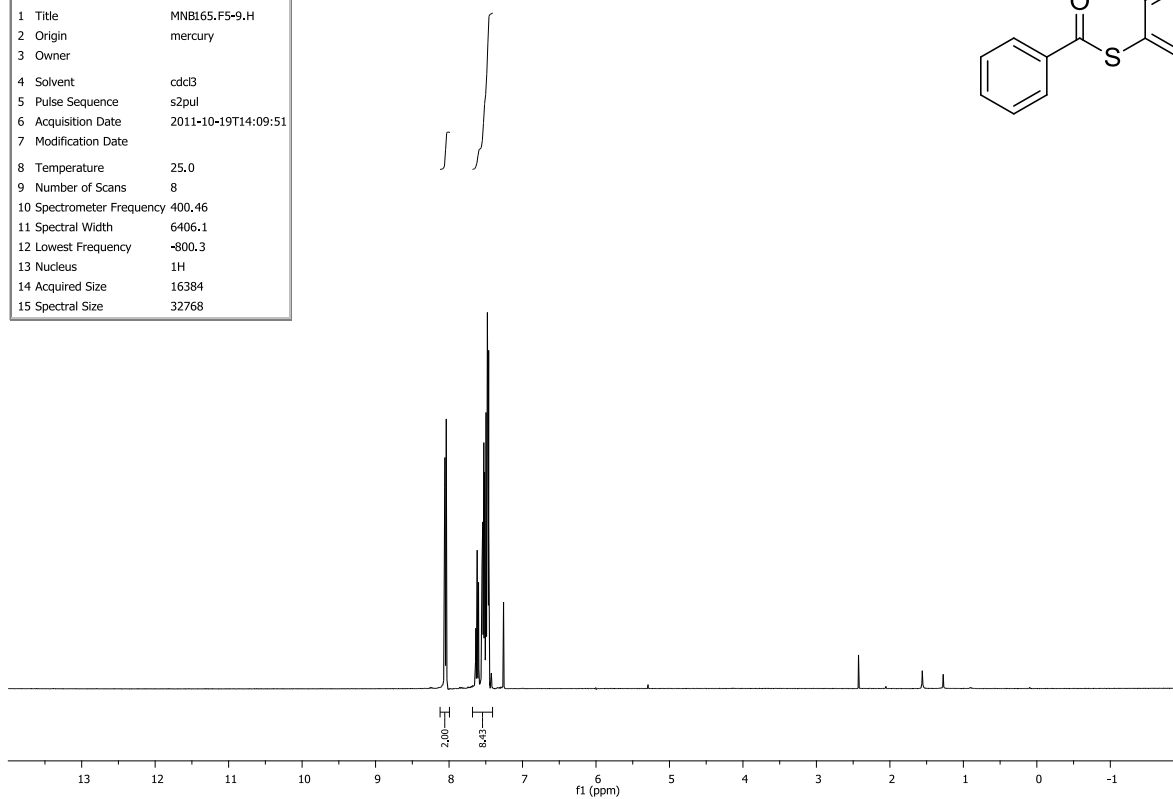

| Parameter                 | Value               |
|---------------------------|---------------------|
| 1 Title                   | MNBI65.F5-9.C       |
| 2 Origin                  | mercury             |
| 3 Owner                   |                     |
| 4 Solvent                 | cdcl3               |
| 5 Pulse Sequence          | s2pul               |
| 6 Acquisition Date        | 2011-10-19T14:21:18 |
| 7 Modification Date       |                     |
| 8 Temperature             | 25.0                |
| 9 Number of Scans         | 256                 |
| 10 Spectrometer Frequency | 100.71              |
| 11 Spectral Width         | 25188.9             |
| 12 Lowest Frequency       | -1517.9             |
| 13 Nucleus                | <sup>13</sup> C     |
| 14 Acquired Size          | 32768               |
| 15 Spectral Size          | 65536               |

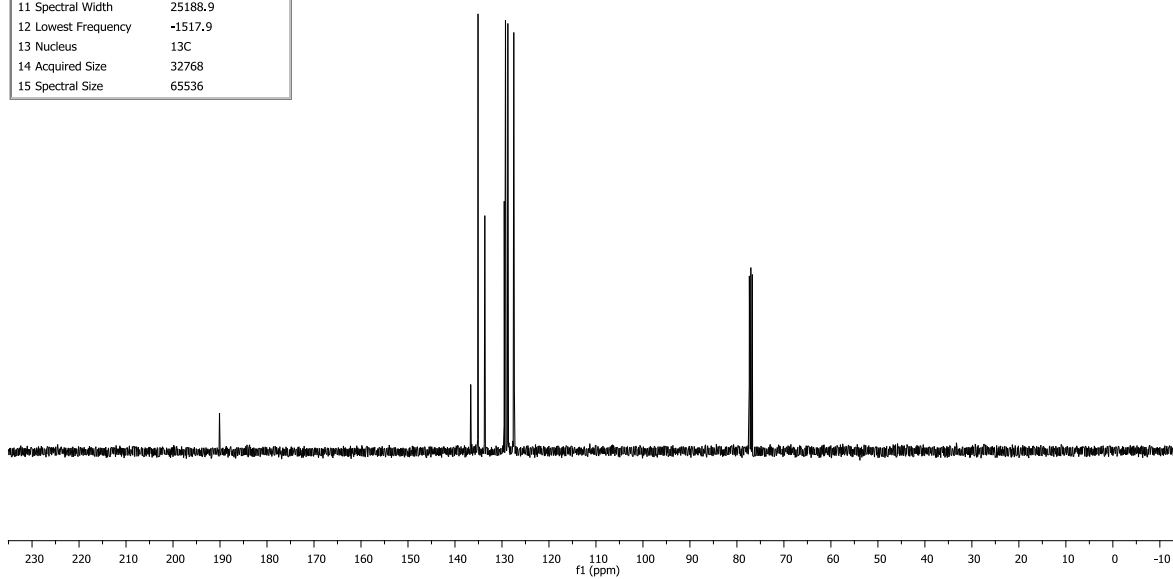

# **S-Phenyl 4-(*tert*-butyl)benzothioate (10)**

| Parameter                 | Value               |
|---------------------------|---------------------|
| 1 Title                   | MNBI78+180_F11-23_H |
| 2 Origin                  | mercury             |
| 3 Owner                   |                     |
| 4 Solvent                 | cdcl3               |
| 5 Pulse Sequence          | s2pul               |
| 6 Acquisition Date        | 2011-10-31T14:26:54 |
| 7 Modification Date       |                     |
| 8 Temperature             | 25.0                |
| 9 Number of Scans         | 8                   |
| 10 Spectrometer Frequency | 400.46              |
| 11 Spectral Width         | 6406.1              |
| 12 Lowest Frequency       | ~800.3              |
| 13 Nucleus                | <sup>1</sup> H      |
| 14 Acquired Size          | 16384               |
| 15 Spectral Size          | 32768               |

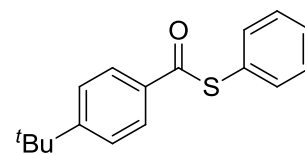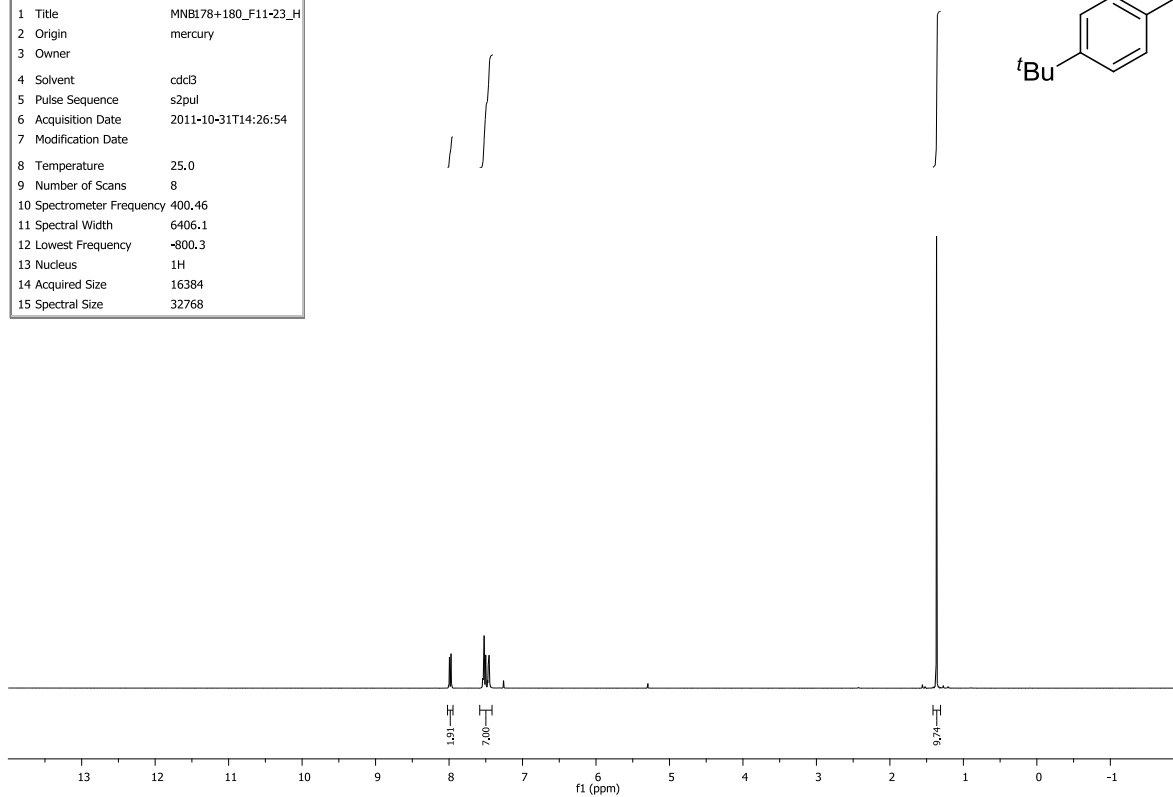

| Parameter                 | Value               |
|---------------------------|---------------------|
| 1 Title                   | MNBI78+180_F11-23_C |
| 2 Origin                  | mercury             |
| 3 Owner                   |                     |
| 4 Solvent                 | cdcl3               |
| 5 Pulse Sequence          | s2pul               |
| 6 Acquisition Date        | 2011-10-31T14:38:23 |
| 7 Modification Date       |                     |
| 8 Temperature             | 25.0                |
| 9 Number of Scans         | 256                 |
| 10 Spectrometer Frequency | 100.71              |
| 11 Spectral Width         | 25188.9             |
| 12 Lowest Frequency       | ~1517.9             |
| 13 Nucleus                | <sup>13</sup> C     |
| 14 Acquired Size          | 32768               |
| 15 Spectral Size          | 65536               |

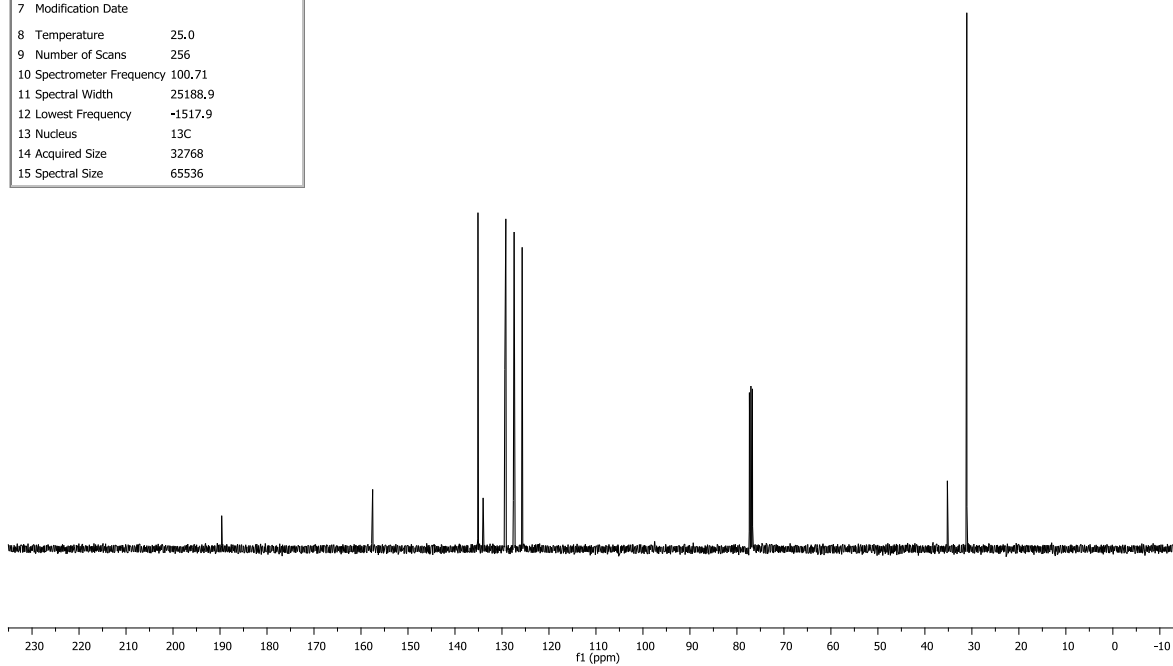

## S-Phenyl 4-methylbenzothioate (11)

| Parameter                 | Value               |
|---------------------------|---------------------|
| 1 Title                   | MNBI66_F6-15.H      |
| 2 Origin                  | mercury             |
| 3 Owner                   |                     |
| 4 Solvent                 | cdcl3               |
| 5 Pulse Sequence          | s2pul               |
| 6 Acquisition Date        | 2011-10-20T16:50:10 |
| 7 Modification Date       |                     |
| 8 Temperature             | 25.0                |
| 9 Number of Scans         | 8                   |
| 10 Spectrometer Frequency | 400.46              |
| 11 Spectral Width         | 6406.1              |
| 12 Lowest Frequency       | -800.3              |
| 13 Nucleus                | <sup>1</sup> H      |
| 14 Acquired Size          | 16384               |
| 15 Spectral Size          | 32768               |

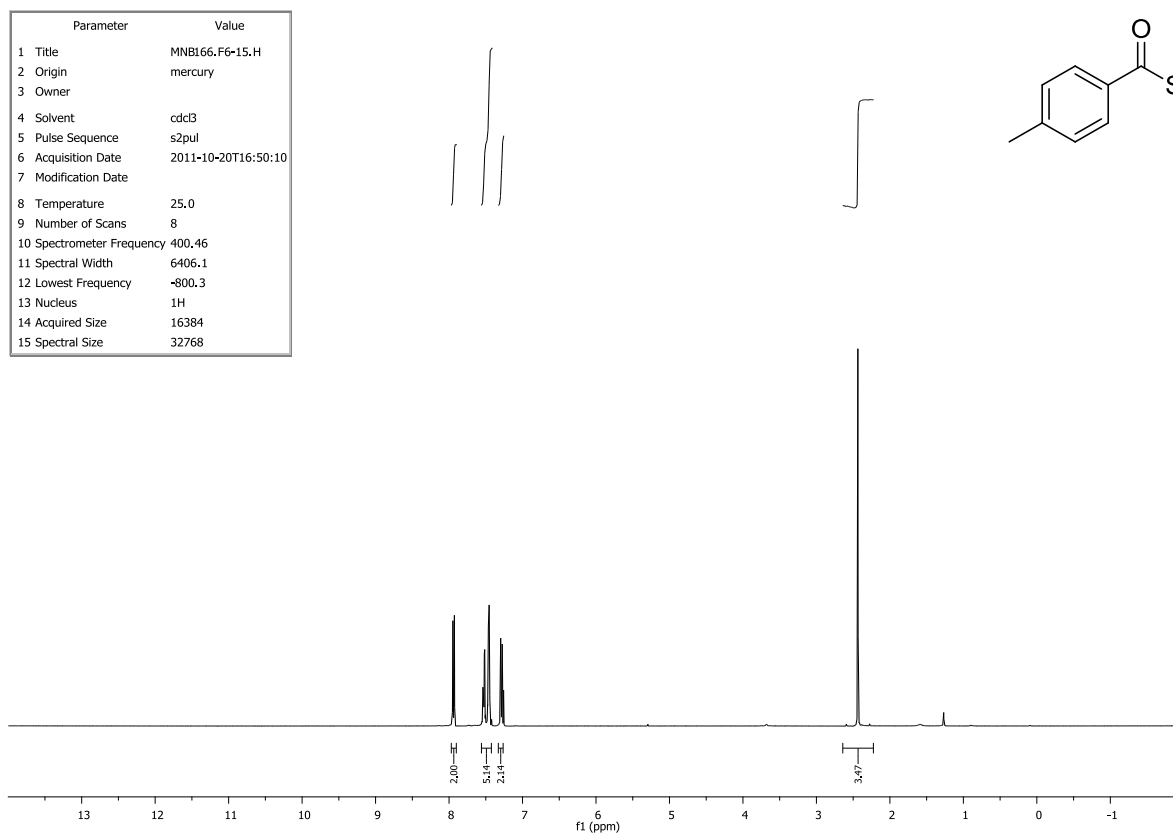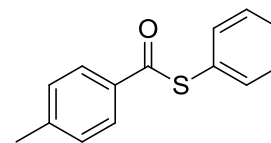

| Parameter                 | Value               |
|---------------------------|---------------------|
| 1 Title                   | MNBI66_F6-15_C      |
| 2 Origin                  | mercury             |
| 3 Owner                   |                     |
| 4 Solvent                 | cdcl3               |
| 5 Pulse Sequence          | s2pul               |
| 6 Acquisition Date        | 2011-10-20T17:01:17 |
| 7 Modification Date       |                     |
| 8 Temperature             | 25.0                |
| 9 Number of Scans         | 256                 |
| 10 Spectrometer Frequency | 100.71              |
| 11 Spectral Width         | 25188.9             |
| 12 Lowest Frequency       | -1517.9             |
| 13 Nucleus                | <sup>13</sup> C     |
| 14 Acquired Size          | 32768               |
| 15 Spectral Size          | 65536               |

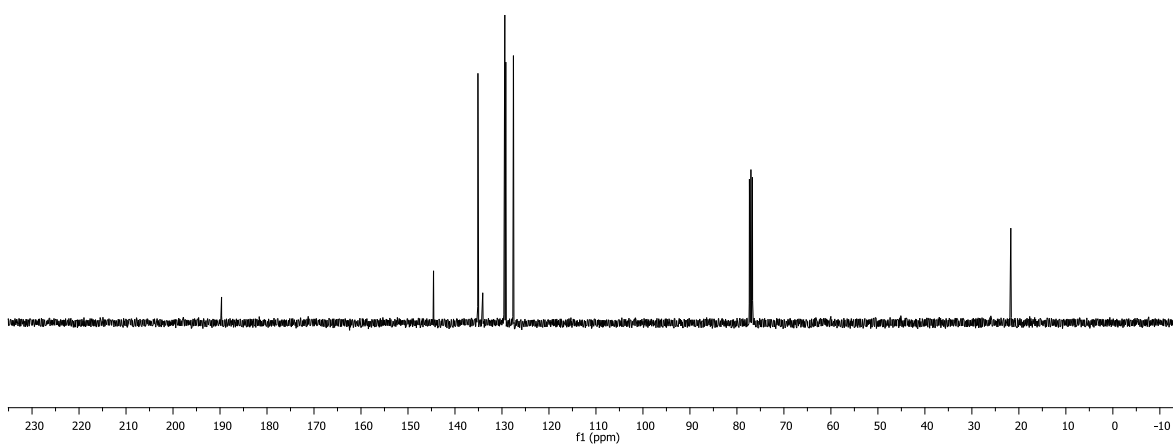

## S-Phenyl 3-methylbenzothioate (12)

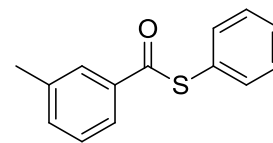

| Parameter                 | Value               |
|---------------------------|---------------------|
| 1 Title                   | MNBL90,F5-11.H2     |
| 2 Origin                  | mercury             |
| 3 Owner                   |                     |
| 4 Solvent                 | cdcl3               |
| 5 Pulse Sequence          | s2pul               |
| 6 Acquisition Date        | 2012-03-23T17:50:14 |
| 7 Modification Date       |                     |
| 8 Temperature             | 25.0                |
| 9 Number of Scans         | 8                   |
| 10 Spectrometer Frequency | 400.46              |
| 11 Spectral Width         | 6406.1              |
| 12 Lowest Frequency       | -799.9              |
| 13 Nucleus                | <sup>1</sup> H      |
| 14 Acquired Size          | 16384               |
| 15 Spectral Size          | 32768               |

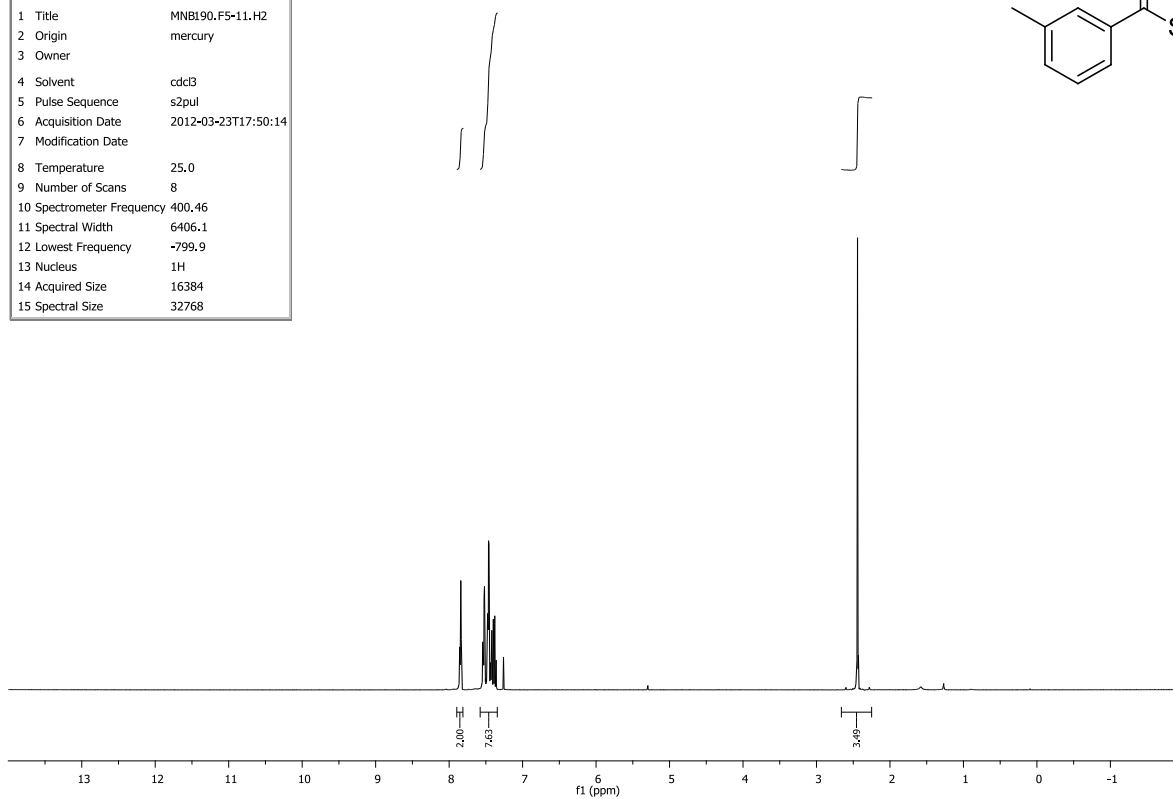

| Parameter                 | Value               |
|---------------------------|---------------------|
| 1 Title                   | MNBL90,F5-11.C      |
| 2 Origin                  | mercury             |
| 3 Owner                   |                     |
| 4 Solvent                 | cdcl3               |
| 5 Pulse Sequence          | s2pul               |
| 6 Acquisition Date        | 2011-11-25T15:20:29 |
| 7 Modification Date       |                     |
| 8 Temperature             | 25.0                |
| 9 Number of Scans         | 256                 |
| 10 Spectrometer Frequency | 100.71              |
| 11 Spectral Width         | 25188.9             |
| 12 Lowest Frequency       | -1517.9             |
| 13 Nucleus                | <sup>13</sup> C     |
| 14 Acquired Size          | 32768               |
| 15 Spectral Size          | 65536               |

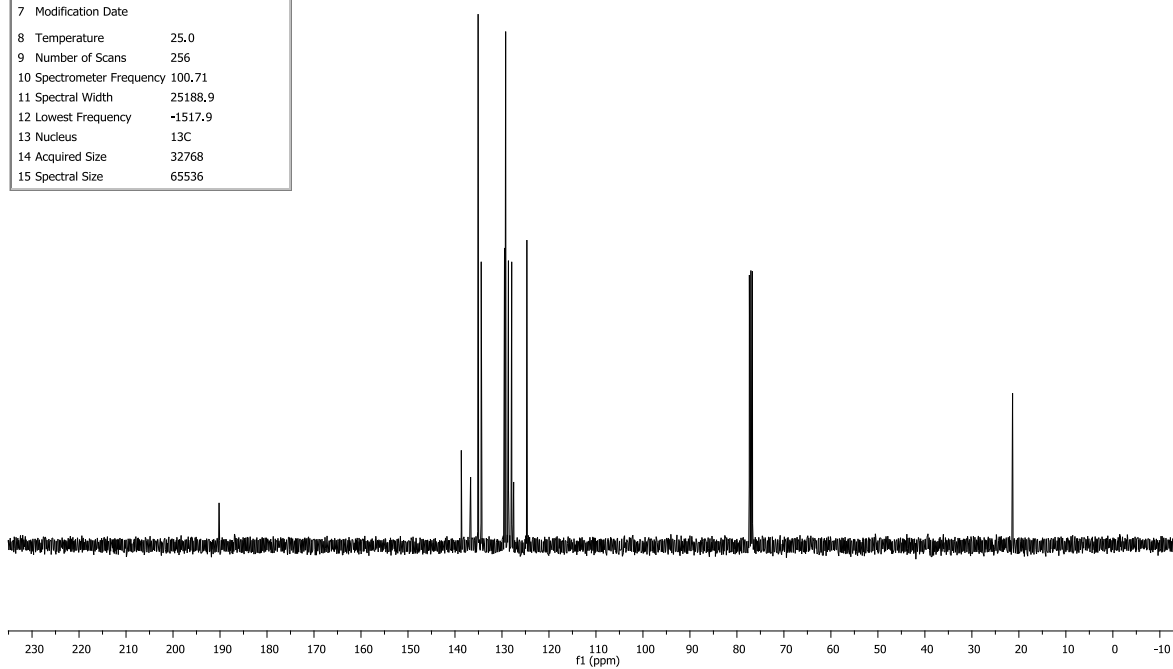

## S-Phenyl 2-methylbenzothioate (13)

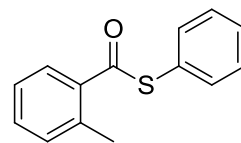

| Parameter                 | Value               |
|---------------------------|---------------------|
| 1 Title                   | MNBI87.F4-7.H       |
| 2 Origin                  | mercury             |
| 3 Owner                   |                     |
| 4 Solvent                 | cdcl3               |
| 5 Pulse Sequence          | s2pul               |
| 6 Acquisition Date        | 2011-11-24T12:12:21 |
| 7 Modification Date       |                     |
| 8 Temperature             | 25.0                |
| 9 Number of Scans         | 8                   |
| 10 Spectrometer Frequency | 400.46              |
| 11 Spectral Width         | 6406.1              |
| 12 Lowest Frequency       | -800.3              |
| 13 Nucleus                | <sup>1</sup> H      |
| 14 Acquired Size          | 16384               |
| 15 Spectral Size          | 32768               |

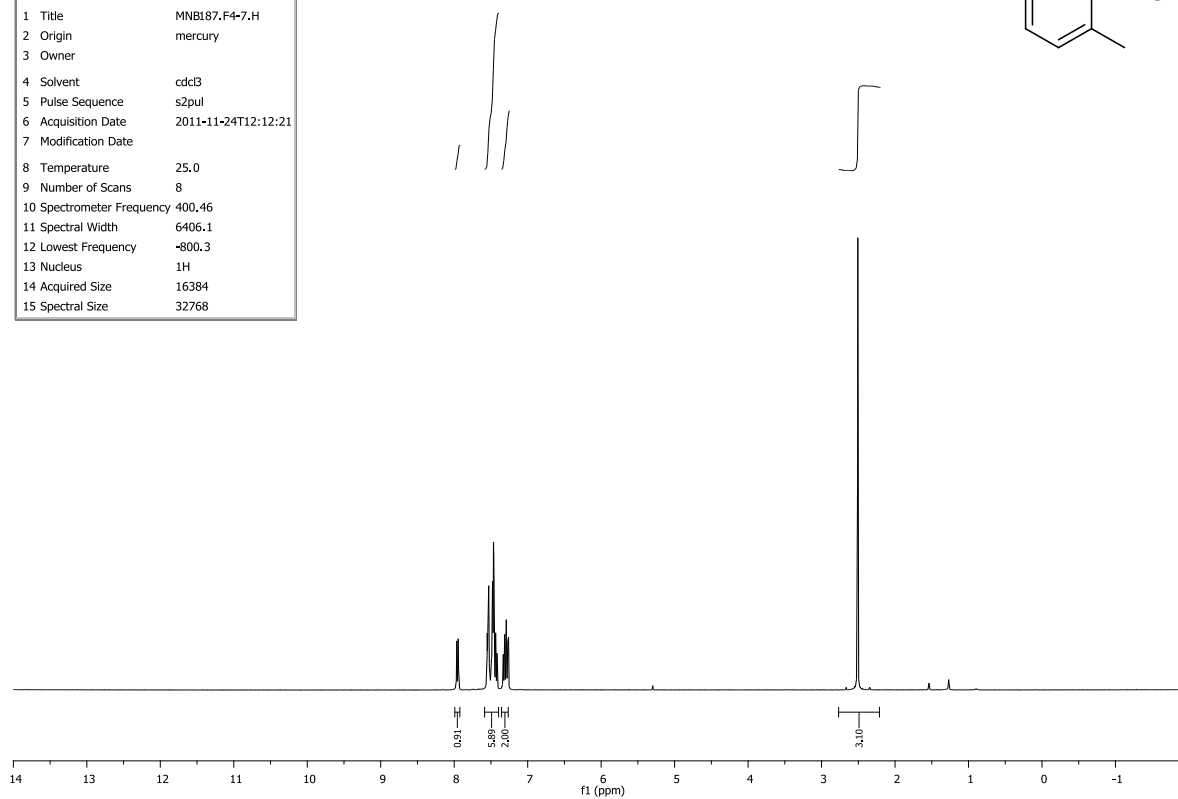

| Parameter                 | Value               |
|---------------------------|---------------------|
| 1 Title                   | MNBI87.F4-7.C2      |
| 2 Origin                  | mercury             |
| 3 Owner                   |                     |
| 4 Solvent                 | cdcl3               |
| 5 Pulse Sequence          | s2pul               |
| 6 Acquisition Date        | 2011-11-24T13:04:01 |
| 7 Modification Date       |                     |
| 8 Temperature             | 25.0                |
| 9 Number of Scans         | 512                 |
| 10 Spectrometer Frequency | 100.71              |
| 11 Spectral Width         | 25188.9             |
| 12 Lowest Frequency       | -1517.9             |
| 13 Nucleus                | <sup>13</sup> C     |
| 14 Acquired Size          | 32768               |
| 15 Spectral Size          | 65536               |

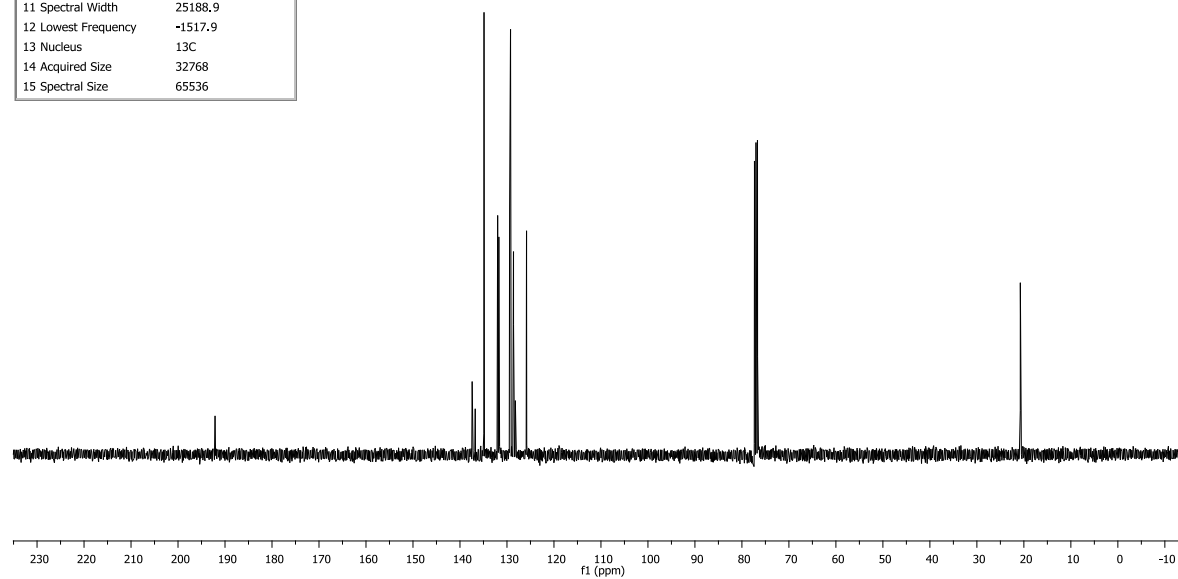

## S-Phenyl-indole-3-carbothioate (14)

| Parameter                 | Value               |
|---------------------------|---------------------|
| 1 Title                   | MNBI83.F27-31.H     |
| 2 Origin                  | mercury             |
| 3 Owner                   |                     |
| 4 Solvent                 | cdcl3               |
| 5 Pulse Sequence          | s2pul               |
| 6 Acquisition Date        | 2011-11-18T14:41:45 |
| 7 Modification Date       |                     |
| 8 Temperature             | 25.0                |
| 9 Number of Scans         | 8                   |
| 10 Spectrometer Frequency | 400.46              |
| 11 Spectral Width         | 6406.1              |
| 12 Lowest Frequency       | -828.9              |
| 13 Nucleus                | <sup>1</sup> H      |
| 14 Acquired Size          | 16384               |
| 15 Spectral Size          | 32768               |

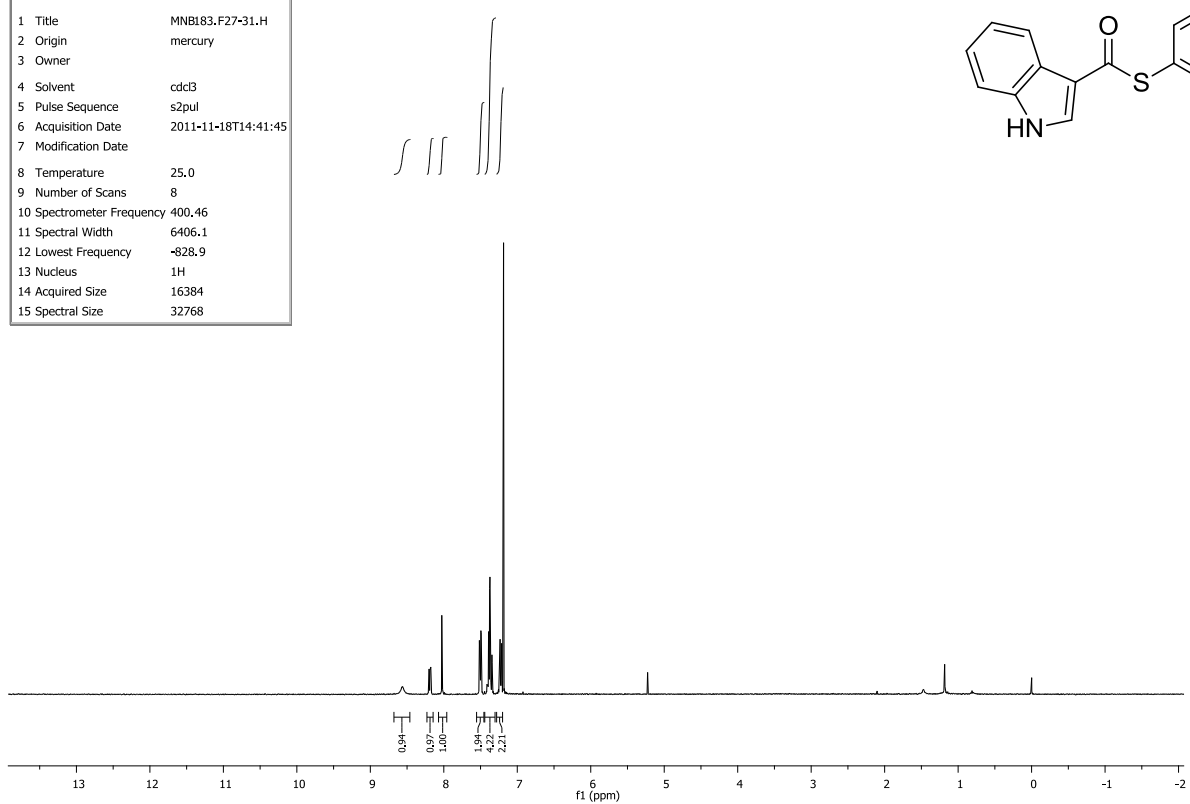

| Parameter                 | Value                |
|---------------------------|----------------------|
| 1 Title                   | MNBI83.F27-31.o/ n.C |
| 2 Origin                  | mercury              |
| 3 Owner                   |                      |
| 4 Solvent                 | cdcl3                |
| 5 Pulse Sequence          | s2pul                |
| 6 Acquisition Date        | 2012-04-26T17:54:05  |
| 7 Modification Date       |                      |
| 8 Temperature             | 25.0                 |
| 9 Number of Scans         | 21852                |
| 10 Spectrometer Frequency | 100.71               |
| 11 Spectral Width         | 25188.9              |
| 12 Lowest Frequency       | -1517.9              |
| 13 Nucleus                | <sup>13</sup> C      |
| 14 Acquired Size          | 32768                |
| 15 Spectral Size          | 65536                |

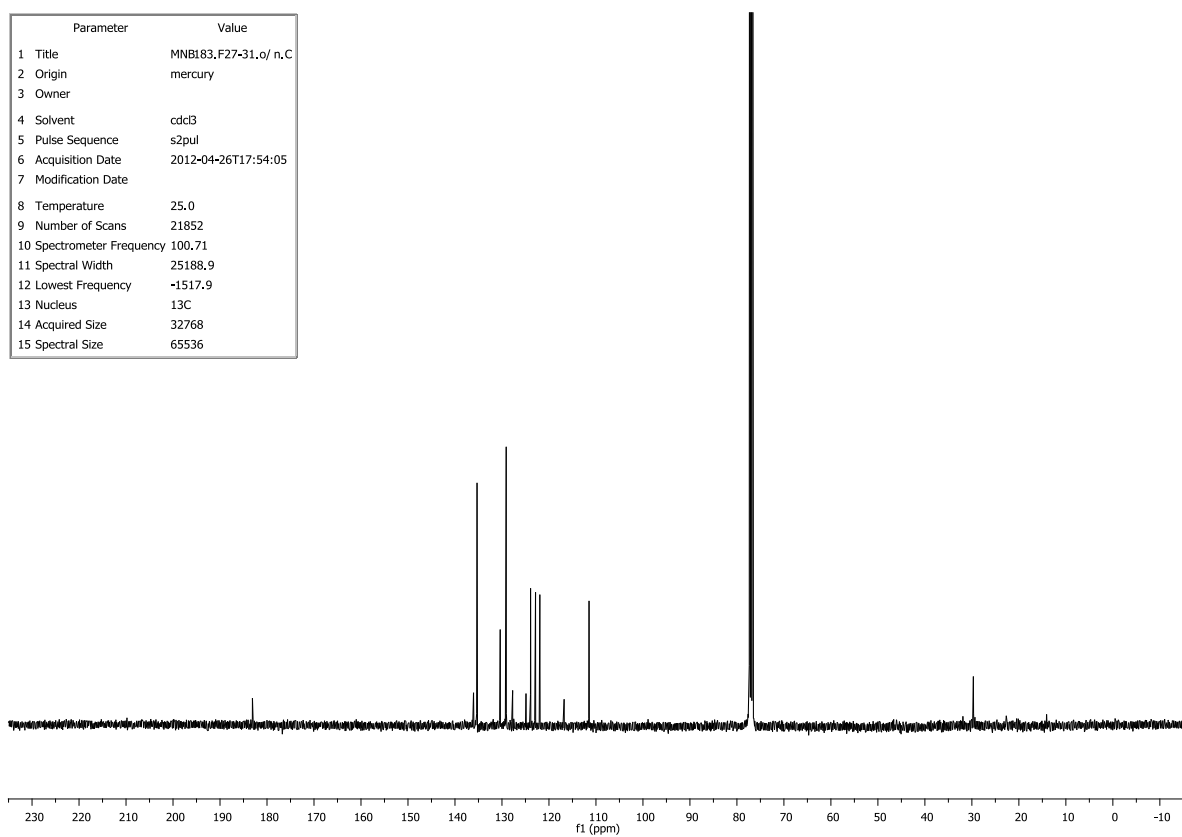

***tert*-Butyl 3-((phenylthio)carbonyl)-indole-1-carboxylate (15)**

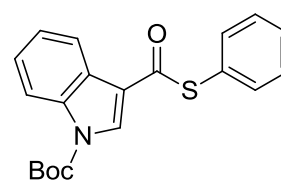

| Parameter                 | Value               |
|---------------------------|---------------------|
| 1 Title                   | MNBI83_F9-22.H      |
| 2 Origin                  | mercury             |
| 3 Owner                   |                     |
| 4 Solvent                 | cdcl3               |
| 5 Pulse Sequence          | s2pul               |
| 6 Acquisition Date        | 2011-11-18T08:56:12 |
| 7 Modification Date       |                     |
| 8 Temperature             | 25.0                |
| 9 Number of Scans         | 8                   |
| 10 Spectrometer Frequency | 400.46              |
| 11 Spectral Width         | 6406.1              |
| 12 Lowest Frequency       | ~834.4              |
| 13 Nucleus                | <sup>1</sup> H      |
| 14 Acquired Size          | 16384               |
| 15 Spectral Size          | 32768               |

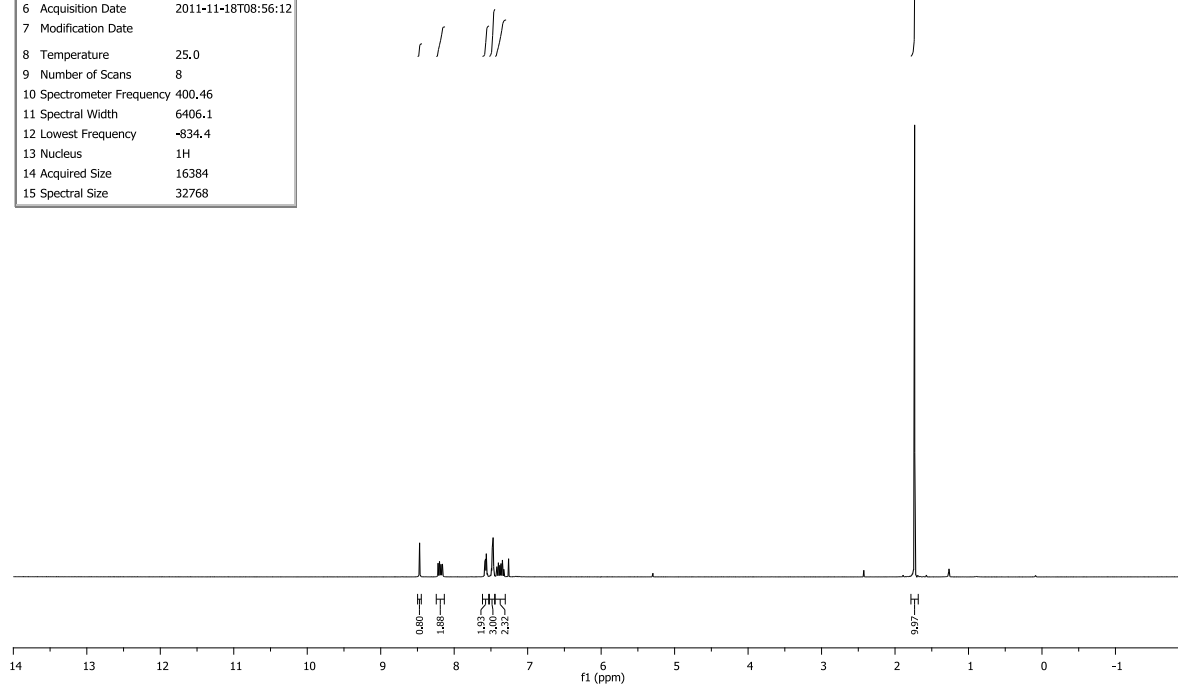

| Parameter                 | Value               |
|---------------------------|---------------------|
| 1 Title                   | MNBI83_F9-22_C      |
| 2 Origin                  | mercury             |
| 3 Owner                   |                     |
| 4 Solvent                 | cdcl3               |
| 5 Pulse Sequence          | s2pul               |
| 6 Acquisition Date        | 2011-11-18T11:45:10 |
| 7 Modification Date       |                     |
| 8 Temperature             | 25.0                |
| 9 Number of Scans         | 572                 |
| 10 Spectrometer Frequency | 100.71              |
| 11 Spectral Width         | 25188.9             |
| 12 Lowest Frequency       | ~1517.9             |
| 13 Nucleus                | <sup>13</sup> C     |
| 14 Acquired Size          | 32768               |
| 15 Spectral Size          | 65536               |

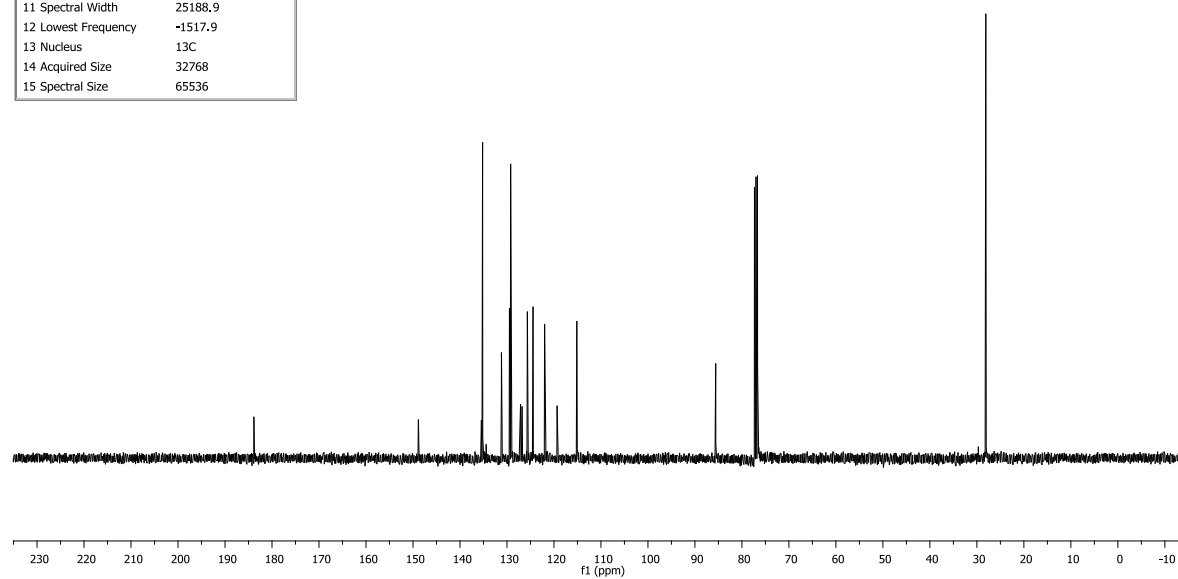

## S-Phenyl thiophene-2-carbothioate (16)

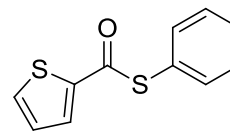

| Parameter                 | Value               |
|---------------------------|---------------------|
| 1 Title                   | MNBL85,F5-13.H2     |
| 2 Origin                  | mercury             |
| 3 Owner                   |                     |
| 4 Solvent                 | cdcl3               |
| 5 Pulse Sequence          | s2pul               |
| 6 Acquisition Date        | 2012-03-23T17:53:00 |
| 7 Modification Date       |                     |
| 8 Temperature             | 25.0                |
| 9 Number of Scans         | 8                   |
| 10 Spectrometer Frequency | 400.46              |
| 11 Spectral Width         | 6406.1              |
| 12 Lowest Frequency       | -799.9              |
| 13 Nucleus                | <sup>1</sup> H      |
| 14 Acquired Size          | 16384               |
| 15 Spectral Size          | 32768               |

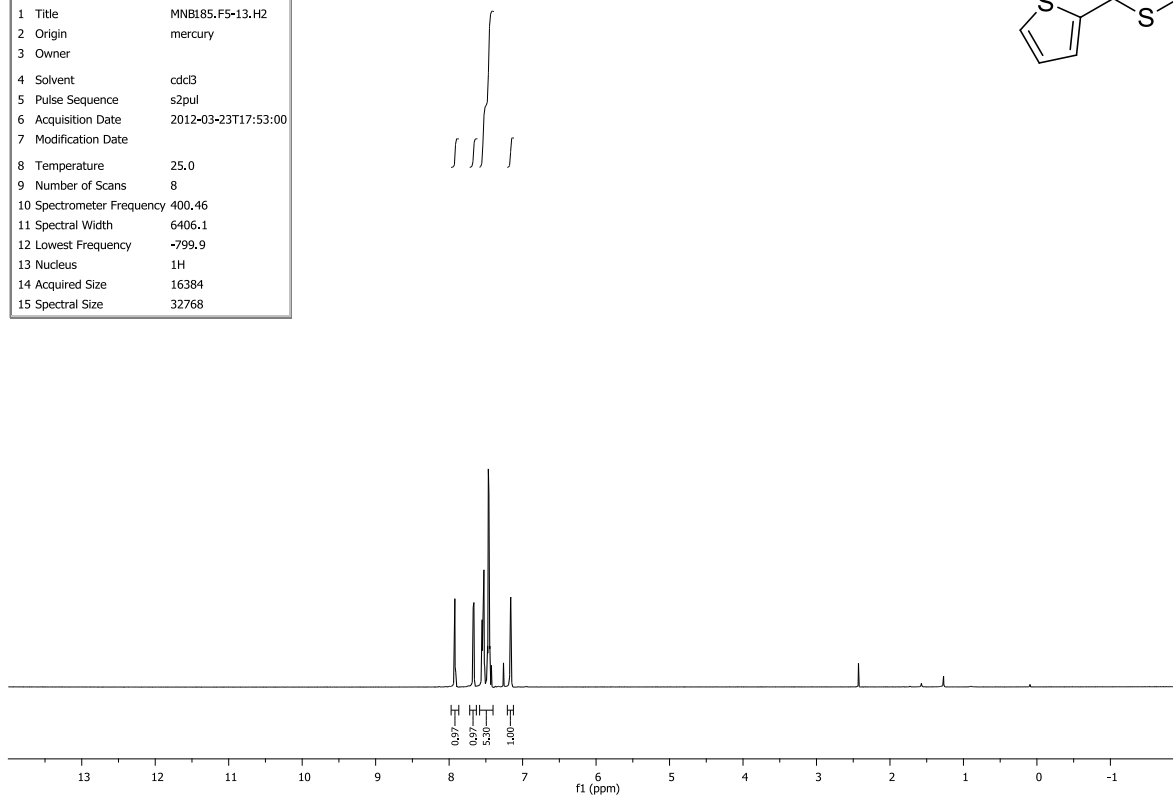

| Parameter                 | Value               |
|---------------------------|---------------------|
| 1 Title                   | MNBL85,F5-13.C      |
| 2 Origin                  | mercury             |
| 3 Owner                   |                     |
| 4 Solvent                 | cdcl3               |
| 5 Pulse Sequence          | s2pul               |
| 6 Acquisition Date        | 2011-11-17T09:34:38 |
| 7 Modification Date       |                     |
| 8 Temperature             | 25.0                |
| 9 Number of Scans         | 256                 |
| 10 Spectrometer Frequency | 100.71              |
| 11 Spectral Width         | 25188.9             |
| 12 Lowest Frequency       | -1517.9             |
| 13 Nucleus                | <sup>13</sup> C     |
| 14 Acquired Size          | 32768               |
| 15 Spectral Size          | 65536               |

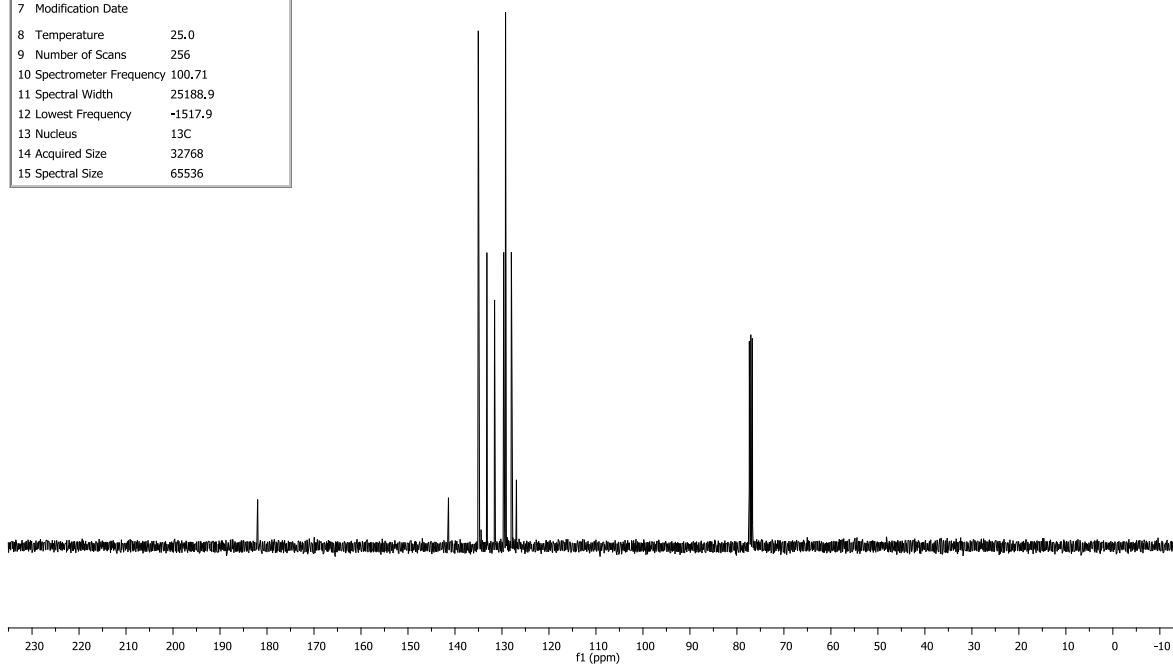

# **S-(4-Methoxyphenyl) 4-methoxybenzothioate (17)**

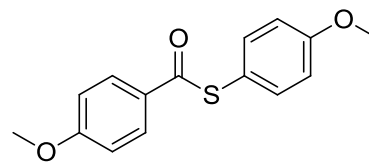

| Parameter                 | Value               |
|---------------------------|---------------------|
| 1 Title                   | MNB199.F17-33.H2    |
| 2 Origin                  | mercury             |
| 3 Owner                   |                     |
| 4 Solvent                 | cdcl3               |
| 5 Pulse Sequence          | s2pul               |
| 6 Acquisition Date        | 2012-03-20T17:04:59 |
| 7 Modification Date       |                     |
| 8 Temperature             | 25.0                |
| 9 Number of Scans         | 8                   |
| 10 Spectrometer Frequency | 400.46              |
| 11 Spectral Width         | 6406.1              |
| 12 Lowest Frequency       | ~800.3              |
| 13 Nucleus                | 1H                  |
| 14 Acquired Size          | 16384               |
| 15 Spectral Size          | 32768               |

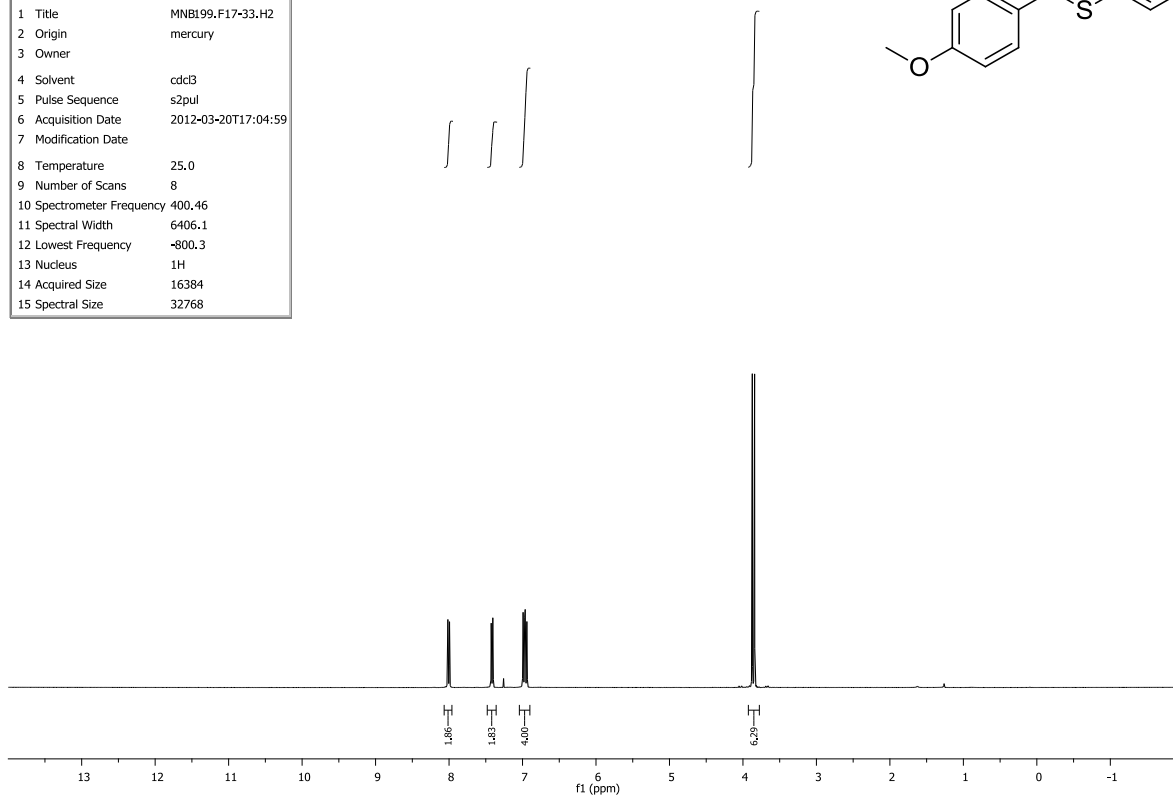

| Parameter                 | Value               |
|---------------------------|---------------------|
| 1 Title                   | MNB199.F17-33.C     |
| 2 Origin                  | mercury             |
| 3 Owner                   |                     |
| 4 Solvent                 | cdcl3               |
| 5 Pulse Sequence          | s2pul               |
| 6 Acquisition Date        | 2012-03-20T17:05:47 |
| 7 Modification Date       |                     |
| 8 Temperature             | 25.0                |
| 9 Number of Scans         | 256                 |
| 10 Spectrometer Frequency | 100.71              |
| 11 Spectral Width         | 25188.9             |
| 12 Lowest Frequency       | ~1517.9             |
| 13 Nucleus                | 13C                 |
| 14 Acquired Size          | 32768               |
| 15 Spectral Size          | 65536               |

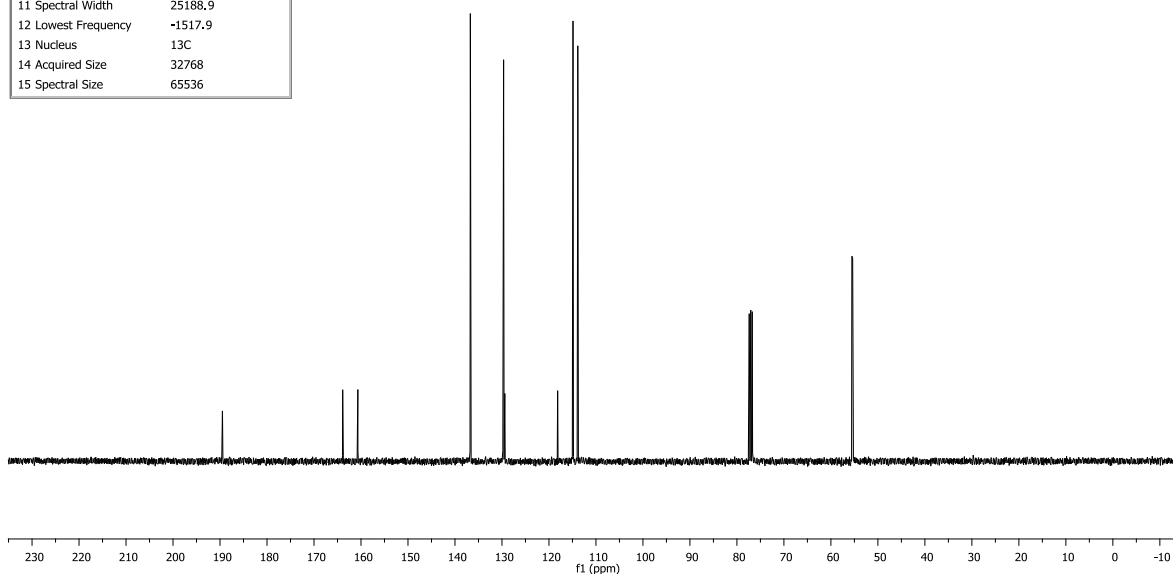

# **S-(2,6-Dimethylphenyl) 4-methoxybenzothioate (18)**

| Parameter                 | Value               |
|---------------------------|---------------------|
| 1 Title                   | MNB215.F5-15.H      |
| 2 Origin                  | mercury             |
| 3 Owner                   |                     |
| 4 Solvent                 | cdcl3               |
| 5 Pulse Sequence          | s2pul               |
| 6 Acquisition Date        | 2012-04-25T07:41:33 |
| 7 Modification Date       |                     |
| 8 Temperature             | 25.0                |
| 9 Number of Scans         | 8                   |
| 10 Spectrometer Frequency | 400.46              |
| 11 Spectral Width         | 6406.1              |
| 12 Lowest Frequency       | -799.9              |
| 13 Nucleus                | 1H                  |
| 14 Acquired Size          | 16384               |
| 15 Spectral Size          | 32768               |

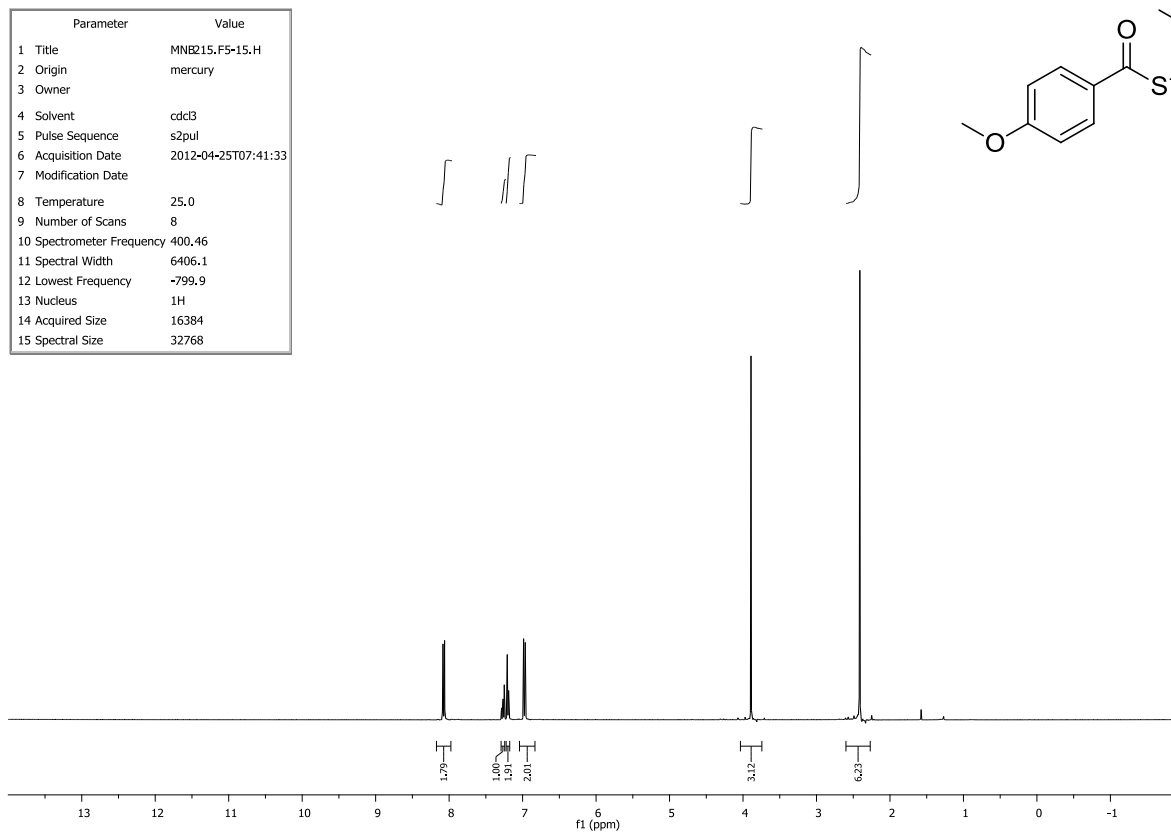

| Parameter                 | Value               |
|---------------------------|---------------------|
| 1 Title                   | MNB215.F5-15.C2     |
| 2 Origin                  | mercury             |
| 3 Owner                   |                     |
| 4 Solvent                 | cdcl3               |
| 5 Pulse Sequence          | s2pul               |
| 6 Acquisition Date        | 2012-04-25T07:42:12 |
| 7 Modification Date       |                     |
| 8 Temperature             | 25.0                |
| 9 Number of Scans         | 220                 |
| 10 Spectrometer Frequency | 100.71              |
| 11 Spectral Width         | 25188.9             |
| 12 Lowest Frequency       | -1517.9             |
| 13 Nucleus                | 13C                 |
| 14 Acquired Size          | 32768               |
| 15 Spectral Size          | 65536               |

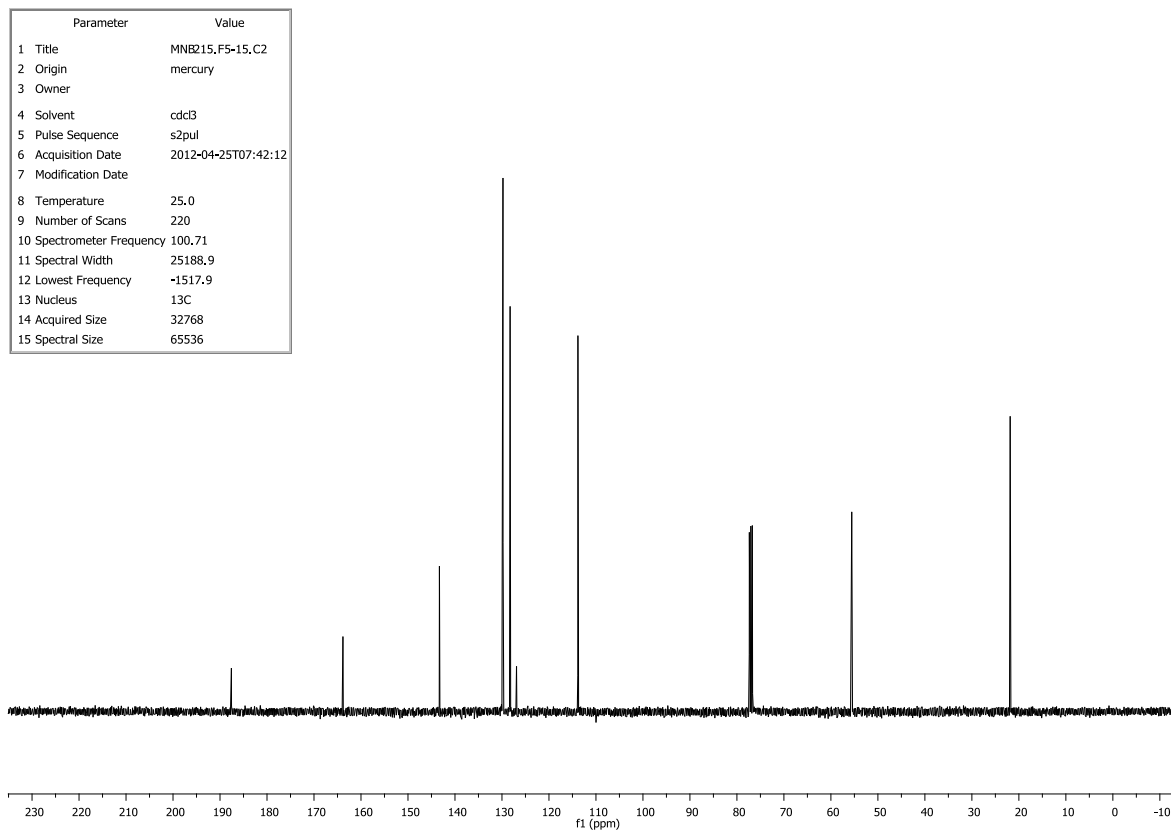

# **S-(3-Methoxyphenyl) 4-methoxybenzothioate (19)**

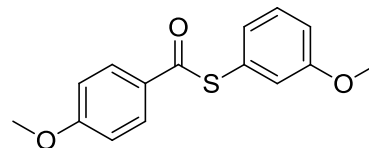

| Parameter                 | Value               |
|---------------------------|---------------------|
| 1 Title                   | MNB202.F6-15.C      |
| 2 Origin                  | mercury             |
| 3 Owner                   |                     |
| 4 Solvent                 | cdcl3               |
| 5 Pulse Sequence          | s2pul               |
| 6 Acquisition Date        | 2011-12-16T12:51:06 |
| 7 Modification Date       |                     |
| 8 Temperature             | 25.0                |
| 9 Number of Scans         | 368                 |
| 10 Spectrometer Frequency | 100.71              |
| 11 Spectral Width         | 25188.9             |
| 12 Lowest Frequency       | -1517.9             |
| 13 Nucleus                | 13C                 |
| 14 Acquired Size          | 32768               |
| 15 Spectral Size          | 65536               |

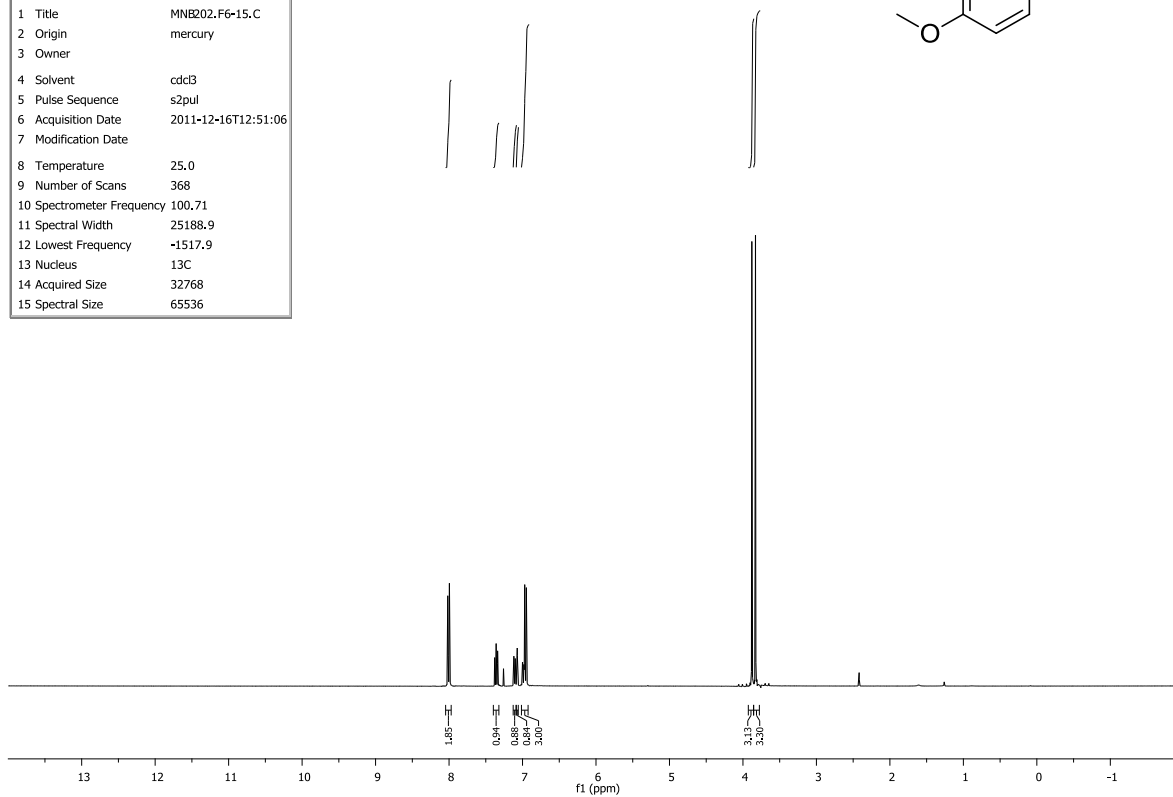

| Parameter                 | Value               |
|---------------------------|---------------------|
| 1 Title                   | MNB202.F6-15.C      |
| 2 Origin                  | mercury             |
| 3 Owner                   |                     |
| 4 Solvent                 | cdcl3               |
| 5 Pulse Sequence          | s2pul               |
| 6 Acquisition Date        | 2011-12-16T12:51:06 |
| 7 Modification Date       |                     |
| 8 Temperature             | 25.0                |
| 9 Number of Scans         | 368                 |
| 10 Spectrometer Frequency | 100.71              |
| 11 Spectral Width         | 25188.9             |
| 12 Lowest Frequency       | -1517.9             |
| 13 Nucleus                | 13C                 |
| 14 Acquired Size          | 32768               |
| 15 Spectral Size          | 65536               |

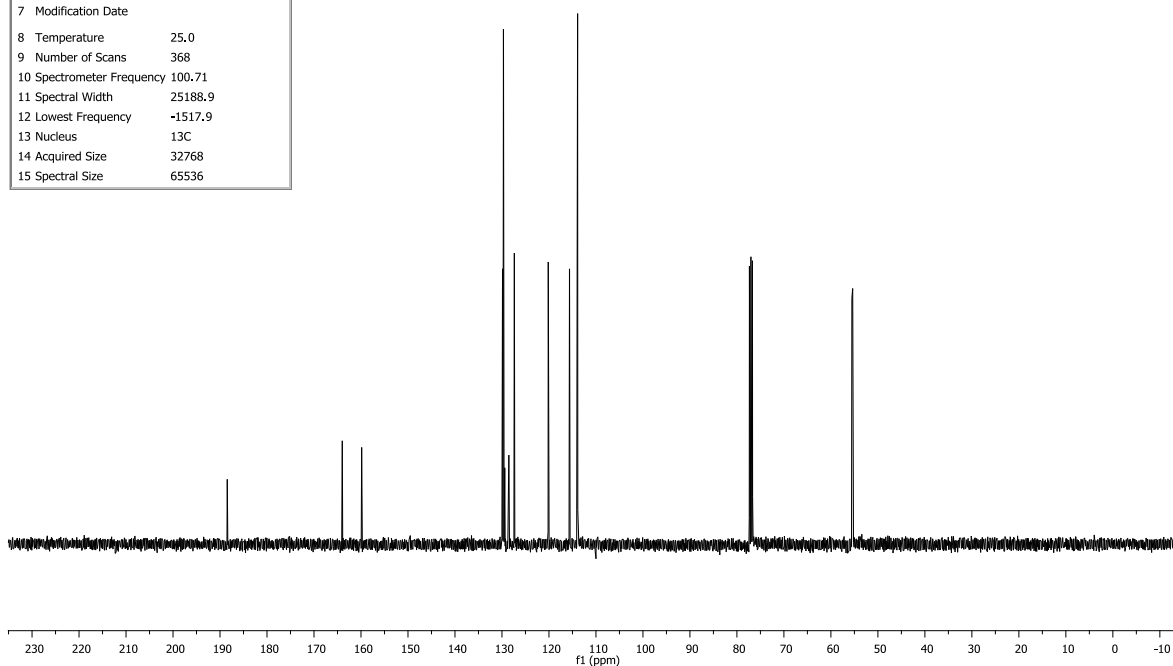

# **S-Octyl 4-methoxybenzothioate (20)**

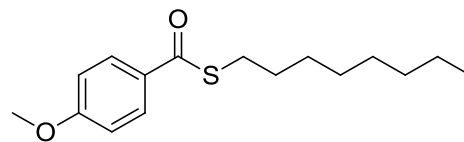

| Parameter                 | Value               |
|---------------------------|---------------------|
| 1 Title                   | MNB203.F7-17.H      |
| 2 Origin                  | mercury             |
| 3 Owner                   |                     |
| 4 Solvent                 | cdcl3               |
| 5 Pulse Sequence          | s2pul               |
| 6 Acquisition Date        | 2011-12-14T12:46:18 |
| 7 Modification Date       |                     |
| 8 Temperature             | 25.0                |
| 9 Number of Scans         | 8                   |
| 10 Spectrometer Frequency | 400.46              |
| 11 Spectral Width         | 6406.1              |
| 12 Lowest Frequency       | -800.3              |
| 13 Nucleus                | 1H                  |
| 14 Acquired Size          | 16384               |
| 15 Spectral Size          | 32768               |

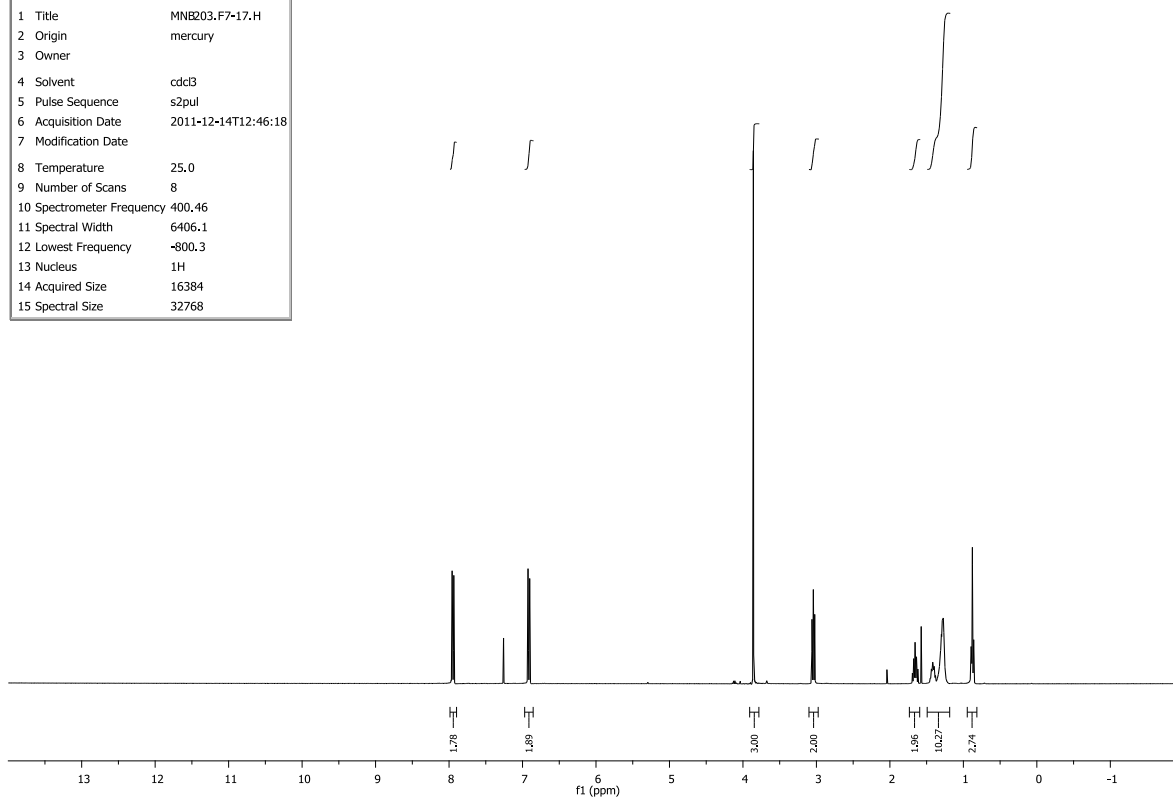

| Parameter                 | Value               |
|---------------------------|---------------------|
| 1 Title                   | MNB203.F7-17.C      |
| 2 Origin                  | mercury             |
| 3 Owner                   |                     |
| 4 Solvent                 | cdcl3               |
| 5 Pulse Sequence          | s2pul               |
| 6 Acquisition Date        | 2011-12-14T12:57:44 |
| 7 Modification Date       |                     |
| 8 Temperature             | 25.0                |
| 9 Number of Scans         | 256                 |
| 10 Spectrometer Frequency | 100.71              |
| 11 Spectral Width         | 25188.9             |
| 12 Lowest Frequency       | -1517.9             |
| 13 Nucleus                | 13C                 |
| 14 Acquired Size          | 32768               |
| 15 Spectral Size          | 65536               |

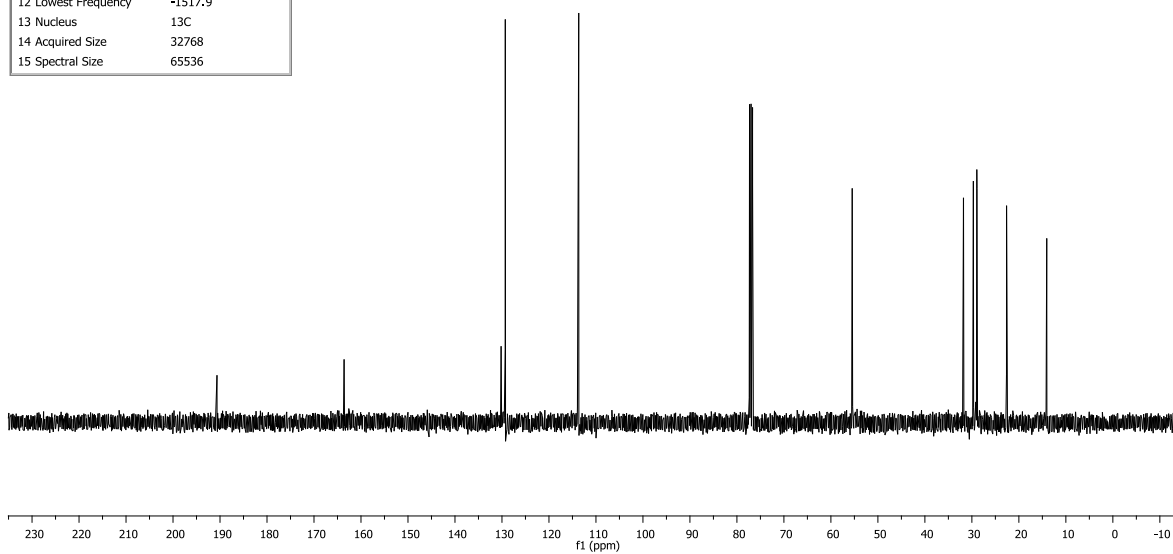

**(R)-Methyl 2-((tert-butoxycarbonyl)amino)-3-((4-methoxybenzoyl)thio)propanoate (21)**

| Parameter                 | Value               |
|---------------------------|---------------------|
| 1 Title                   | MNE229              |
| 2 Origin                  | mercury             |
| 3 Owner                   |                     |
| 4 Solvent                 | cdcl3               |
| 5 Pulse Sequence          | s2pul               |
| 6 Acquisition Date        | 2012-03-07T17:32:16 |
| 7 Modification Date       |                     |
| 8 Temperature             | 25.0                |
| 9 Number of Scans         | 22672               |
| 10 Spectrometer Frequency | 100.71              |
| 11 Spectral Width         | 25188.9             |
| 12 Lowest Frequency       | -1517.9             |
| 13 Nucleus                | 13C                 |
| 14 Acquired Size          | 32768               |
| 15 Spectral Size          | 65536               |

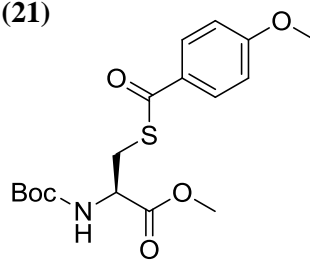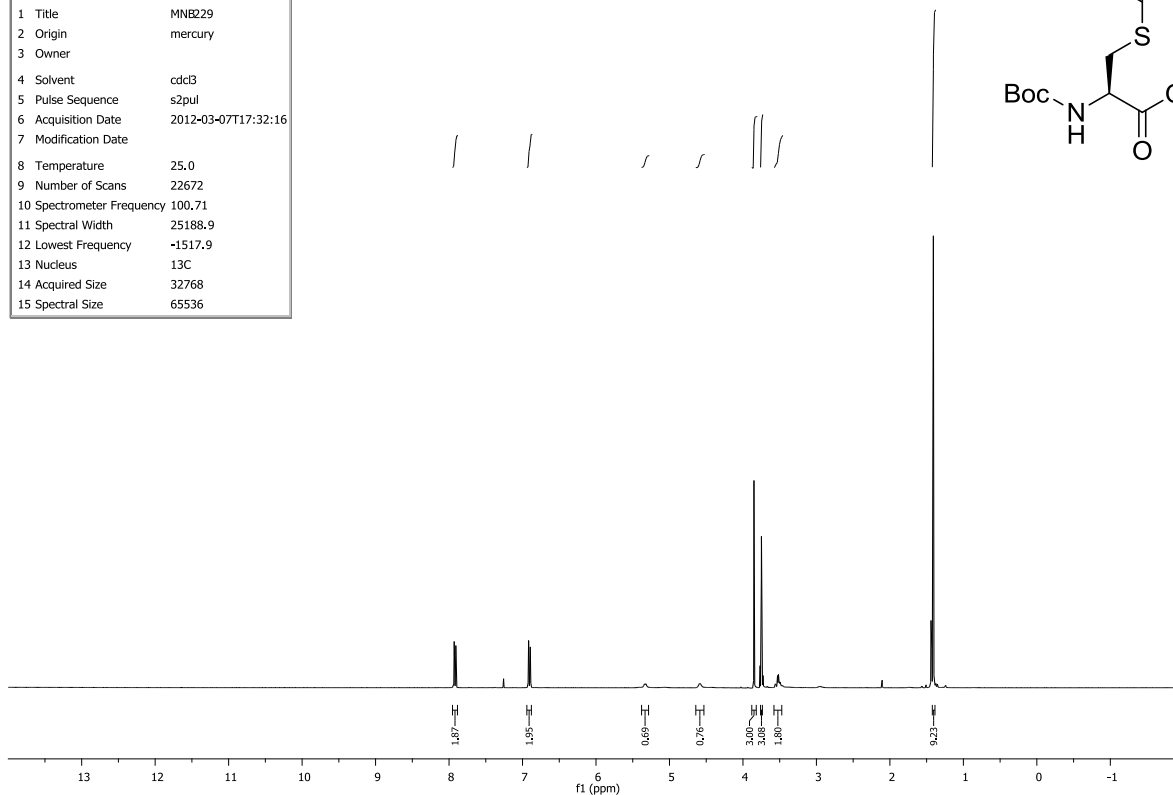

| Parameter                 | Value                      |
|---------------------------|----------------------------|
| 1 Title                   | STANDARD CARBON PARAMETERS |
| 2 Origin                  | mercury                    |
| 3 Owner                   |                            |
| 4 Solvent                 | cdcl3                      |
| 5 Pulse Sequence          | s2pul                      |
| 6 Acquisition Date        | 2012-03-07T17:32:16        |
| 7 Modification Date       |                            |
| 8 Temperature             | 25.0                       |
| 9 Number of Scans         | 22672                      |
| 10 Spectrometer Frequency | 100.71                     |
| 11 Spectral Width         | 25188.9                    |
| 12 Lowest Frequency       | -1517.9                    |
| 13 Nucleus                | 13C                        |
| 14 Acquired Size          | 32768                      |
| 15 Spectral Size          | 65536                      |

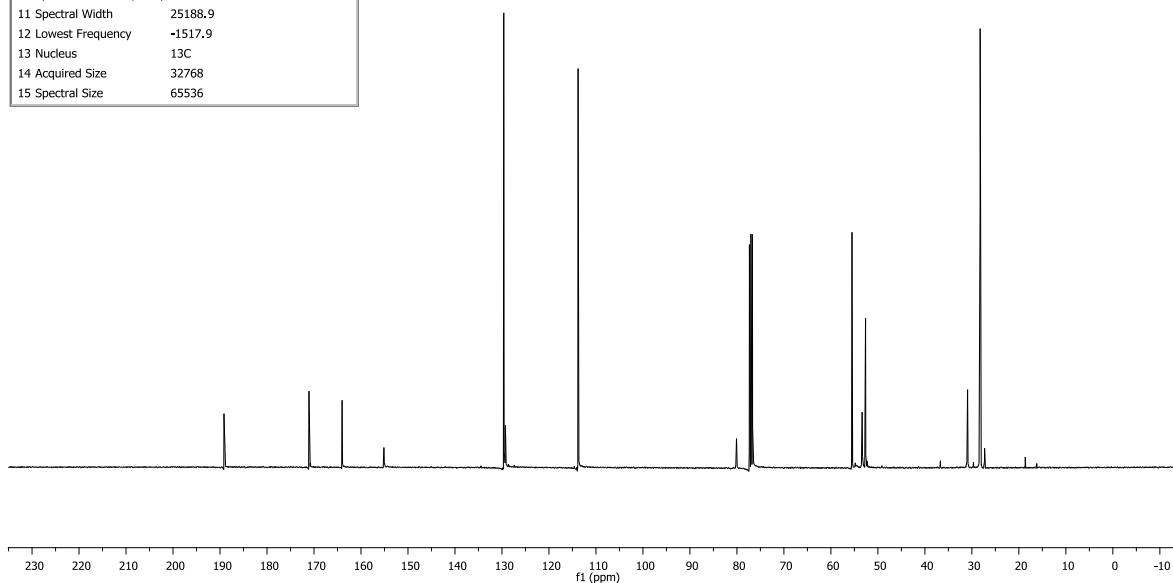

**(S)-Methyl 2-((R)-2-((tert-butoxycarbonyl)amino)-3-((4-ethoxybenzoyl)thio)propanamido)propanoate  
(22)**

| Parameter                 | Value               |
|---------------------------|---------------------|
| 1 Title                   | MN8259_FC2,F7-17.H  |
| 2 Origin                  | mercury             |
| 3 Owner                   |                     |
| 4 Solvent                 | cdcl3               |
| 5 Pulse Sequence          | s2pul               |
| 6 Acquisition Date        | 2012-05-14T12:57:45 |
| 7 Modification Date       |                     |
| 8 Temperature             | 25.0                |
| 9 Number of Scans         | 8                   |
| 10 Spectrometer Frequency | 400.46              |
| 11 Spectral Width         | 6406.1              |
| 12 Lowest Frequency       | ~800.3              |
| 13 Nucleus                | 1H                  |
| 14 Acquired Size          | 16384               |
| 15 Spectral Size          | 32768               |

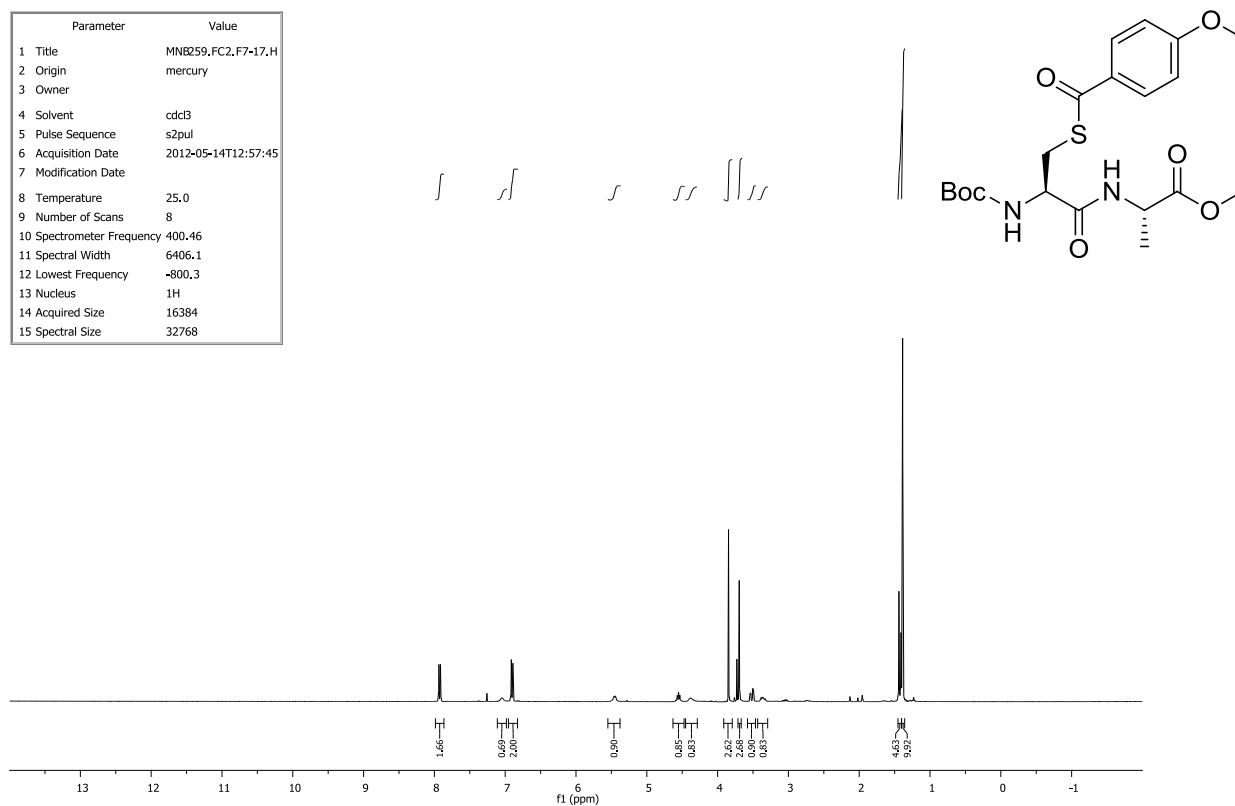

| Parameter                 | Value               |
|---------------------------|---------------------|
| 1 Title                   | MN8259_FC2,F7-17.C  |
| 2 Origin                  | mercury             |
| 3 Owner                   |                     |
| 4 Solvent                 | cdcl3               |
| 5 Pulse Sequence          | s2pul               |
| 6 Acquisition Date        | 2012-05-14T13:08:44 |
| 7 Modification Date       |                     |
| 8 Temperature             | 25.0                |
| 9 Number of Scans         | 256                 |
| 10 Spectrometer Frequency | 100.71              |
| 11 Spectral Width         | 25188.9             |
| 12 Lowest Frequency       | ~1517.9             |
| 13 Nucleus                | 13C                 |
| 14 Acquired Size          | 32768               |
| 15 Spectral Size          | 65536               |

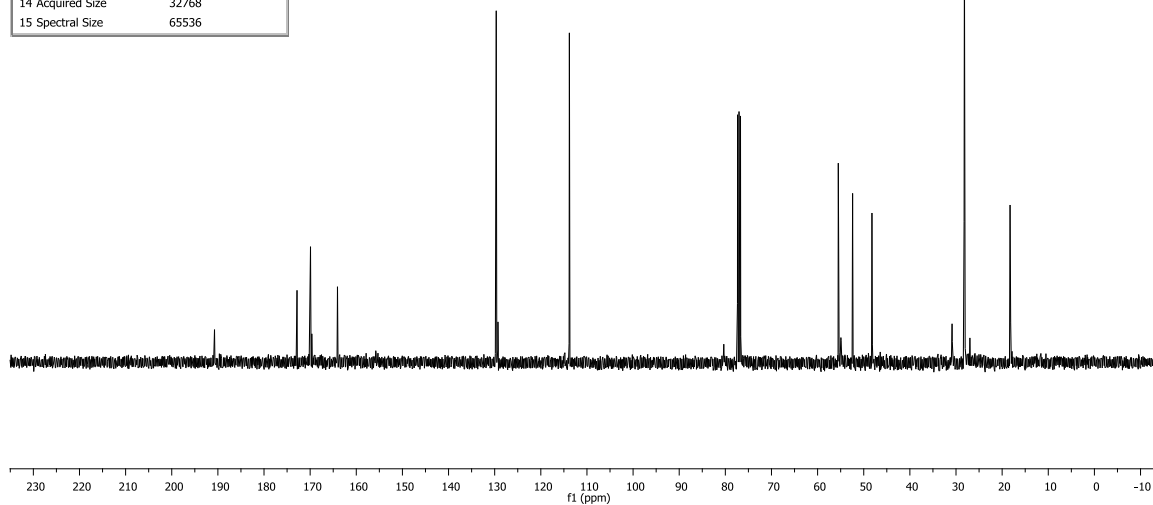

# **S-Phenyl 4-(trifluoromethyl)benzothioate (23)**

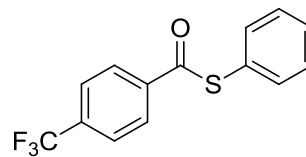

| Parameter                 | Value               |
|---------------------------|---------------------|
| 1 Title                   | MNB215_F4-7.H       |
| 2 Origin                  | mercury             |
| 3 Owner                   |                     |
| 4 Solvent                 | cdcl3               |
| 5 Pulse Sequence          | s2pul               |
| 6 Acquisition Date        | 2012-02-08T12:43:44 |
| 7 Modification Date       |                     |
| 8 Temperature             | 25.0                |
| 9 Number of Scans         | 8                   |
| 10 Spectrometer Frequency | 400.46              |
| 11 Spectral Width         | 6406.1              |
| 12 Lowest Frequency       | -800.3              |
| 13 Nucleus                | <sup>1</sup> H      |
| 14 Acquired Size          | 16384               |
| 15 Spectral Size          | 32768               |

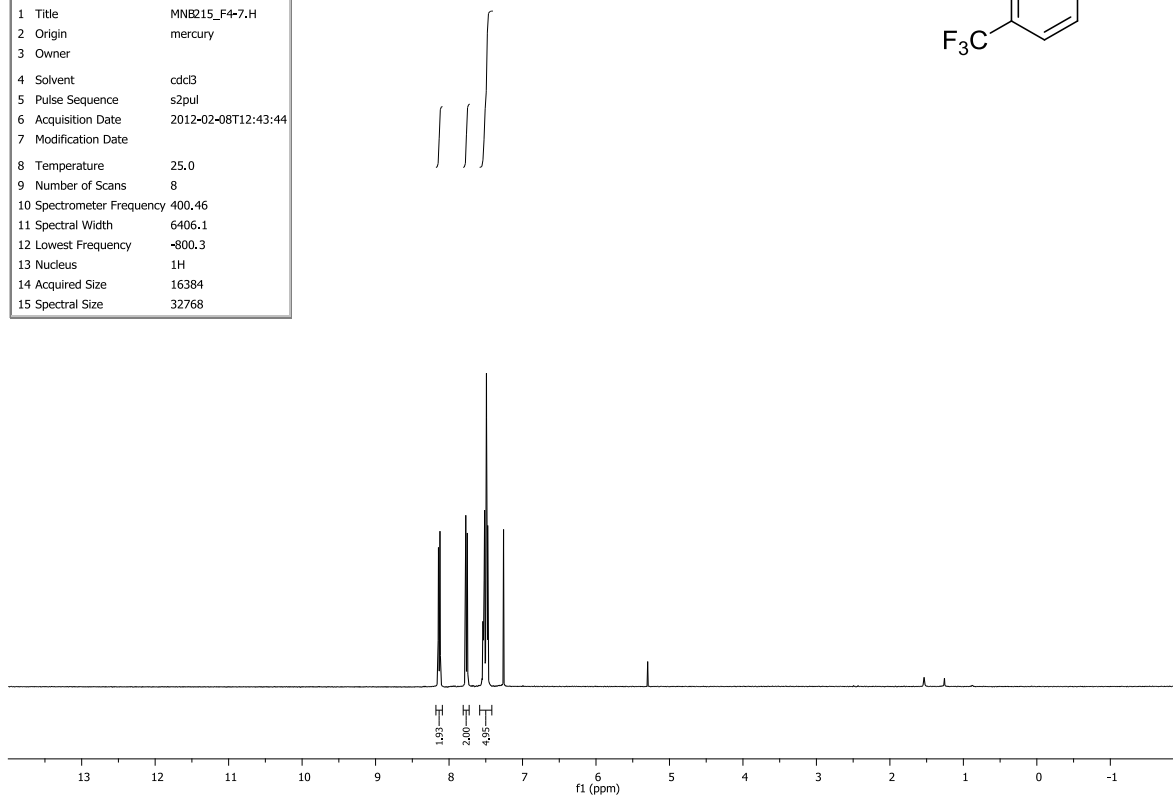

| Parameter                 | Value               |
|---------------------------|---------------------|
| 1 Title                   | MNB215_F4-7_C_o/ n  |
| 2 Origin                  | mercury             |
| 3 Owner                   |                     |
| 4 Solvent                 | cdcl3               |
| 5 Pulse Sequence          | s2pul               |
| 6 Acquisition Date        | 2012-02-08T17:27:29 |
| 7 Modification Date       |                     |
| 8 Temperature             | 25.0                |
| 9 Number of Scans         | 21148               |
| 10 Spectrometer Frequency | 100.71              |
| 11 Spectral Width         | 25188.9             |
| 12 Lowest Frequency       | -1517.9             |
| 13 Nucleus                | <sup>13</sup> C     |
| 14 Acquired Size          | 32768               |
| 15 Spectral Size          | 65536               |

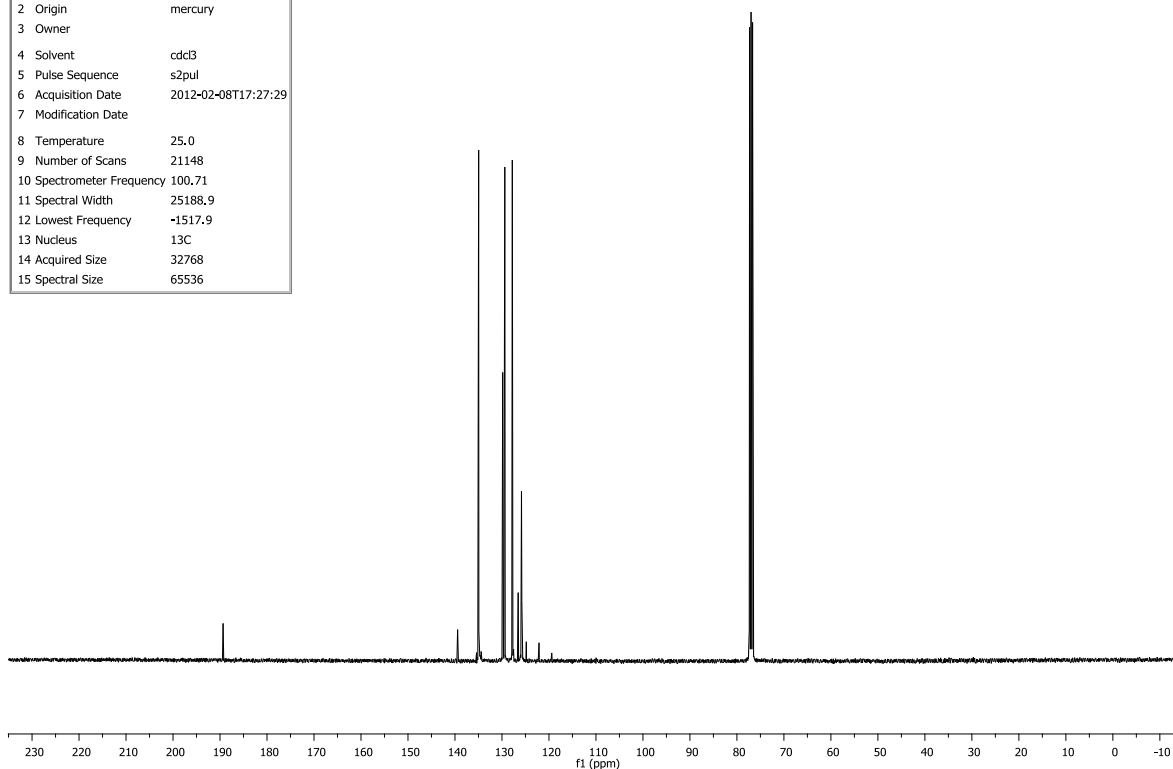

| Parameter                 | Value               |
|---------------------------|---------------------|
| 1 Title                   | MNB215.F4-7.F       |
| 2 Origin                  | mercury             |
| 3 Owner                   |                     |
| 4 Solvent                 | cdcl3               |
| 5 Pulse Sequence          | s2pul               |
| 6 Acquisition Date        | 2012-03-20T17:02:34 |
| 7 Modification Date       |                     |
| 8 Temperature             | 25.0                |
| 9 Number of Scans         | 16                  |
| 10 Spectrometer Frequency | 376.78              |
| 11 Spectral Width         | 86956.5             |
| 12 Lowest Frequency       | -75507.1            |
| 13 Nucleus                | 19F                 |
| 14 Acquired Size          | 64000               |
| 15 Spectral Size          | 131072              |

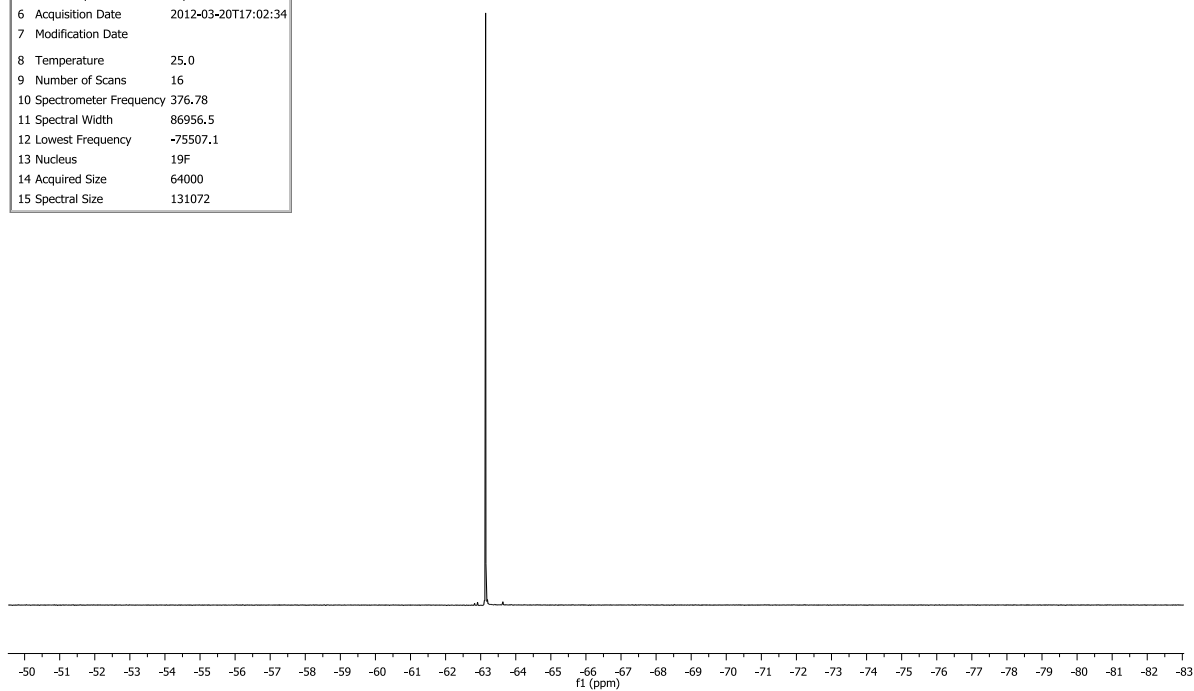

# **S-Phenyl 3-chlorobenzothioate (24)**

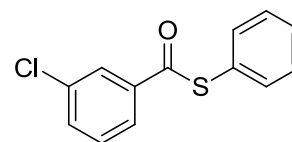

| Parameter                 | Value               |
|---------------------------|---------------------|
| 1 Title                   | MNB219.F4-9.H2      |
| 2 Origin                  | mercury             |
| 3 Owner                   |                     |
| 4 Solvent                 | cdcl3               |
| 5 Pulse Sequence          | s2pul               |
| 6 Acquisition Date        | 2012-03-09T17:08:18 |
| 7 Modification Date       |                     |
| 8 Temperature             | 25.0                |
| 9 Number of Scans         | 8                   |
| 10 Spectrometer Frequency | 400.46              |
| 11 Spectral Width         | 6406.1              |
| 12 Lowest Frequency       | ~800.3              |
| 13 Nucleus                | 1H                  |
| 14 Acquired Size          | 16384               |
| 15 Spectral Size          | 32768               |

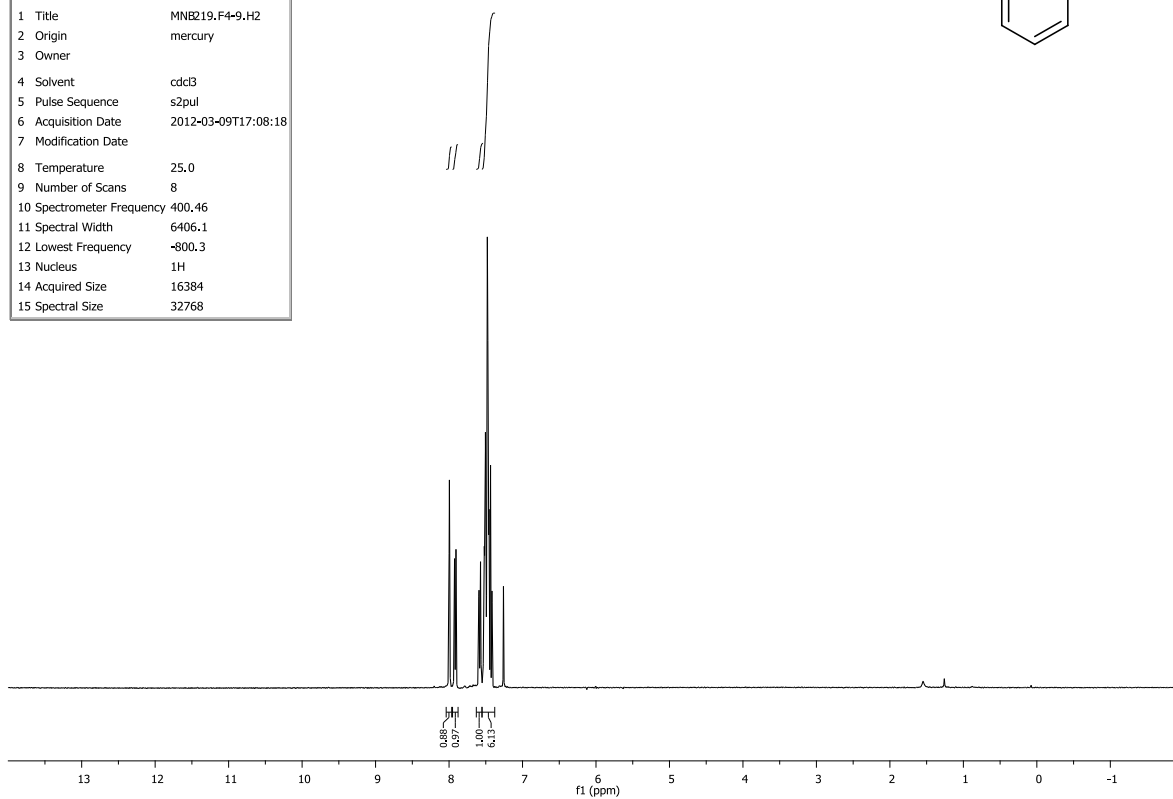

| Parameter                 | Value               |
|---------------------------|---------------------|
| 1 Title                   | MNB219.F4-9.H2      |
| 2 Origin                  | mercury             |
| 3 Owner                   |                     |
| 4 Solvent                 | cdcl3               |
| 5 Pulse Sequence          | s2pul               |
| 6 Acquisition Date        | 2012-03-09T17:08:18 |
| 7 Modification Date       |                     |
| 8 Temperature             | 25.0                |
| 9 Number of Scans         | 8                   |
| 10 Spectrometer Frequency | 400.46              |
| 11 Spectral Width         | 6406.1              |
| 12 Lowest Frequency       | ~800.3              |
| 13 Nucleus                | 1H                  |
| 14 Acquired Size          | 16384               |
| 15 Spectral Size          | 32768               |

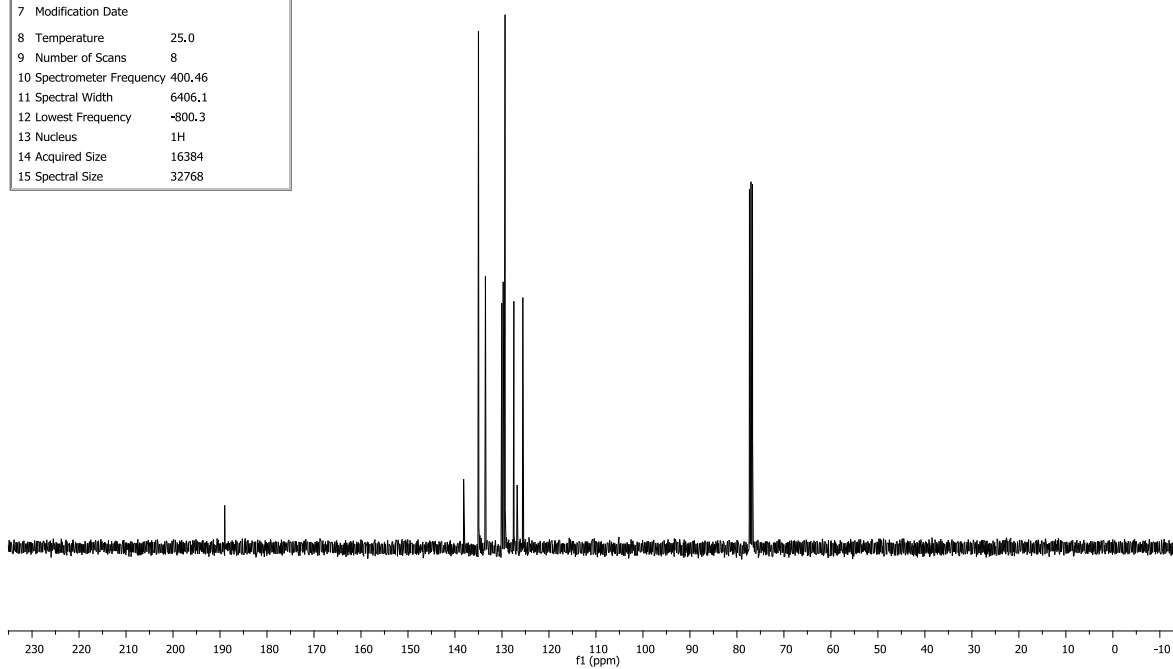

# **S-Phenyl 4-chlorobenzothioate (25)**

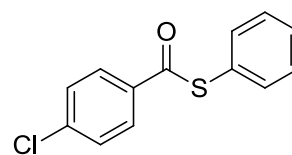

| Parameter                 | Value               |
|---------------------------|---------------------|
| 1 Title                   | MNB225.F5-10.H      |
| 2 Origin                  | mercury             |
| 3 Owner                   |                     |
| 4 Solvent                 | cdcl3               |
| 5 Pulse Sequence          | s2pul               |
| 6 Acquisition Date        | 2012-02-15T09:36:26 |
| 7 Modification Date       |                     |
| 8 Temperature             | 25.0                |
| 9 Number of Scans         | 8                   |
| 10 Spectrometer Frequency | 400.46              |
| 11 Spectral Width         | 6406.1              |
| 12 Lowest Frequency       | ~800.3              |
| 13 Nucleus                | 1H                  |
| 14 Acquired Size          | 16384               |
| 15 Spectral Size          | 32768               |

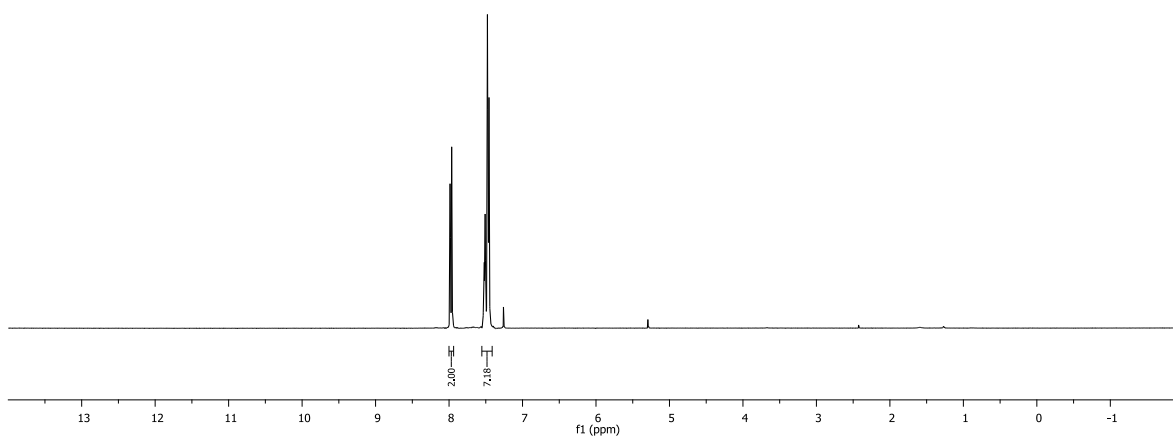

| Parameter                 | Value               |
|---------------------------|---------------------|
| 1 Title                   | MNB225.F5-10.H      |
| 2 Origin                  | mercury             |
| 3 Owner                   |                     |
| 4 Solvent                 | cdcl3               |
| 5 Pulse Sequence          | s2pul               |
| 6 Acquisition Date        | 2012-02-15T09:36:26 |
| 7 Modification Date       |                     |
| 8 Temperature             | 25.0                |
| 9 Number of Scans         | 8                   |
| 10 Spectrometer Frequency | 400.46              |
| 11 Spectral Width         | 6406.1              |
| 12 Lowest Frequency       | ~800.3              |
| 13 Nucleus                | 1H                  |
| 14 Acquired Size          | 16384               |
| 15 Spectral Size          | 32768               |

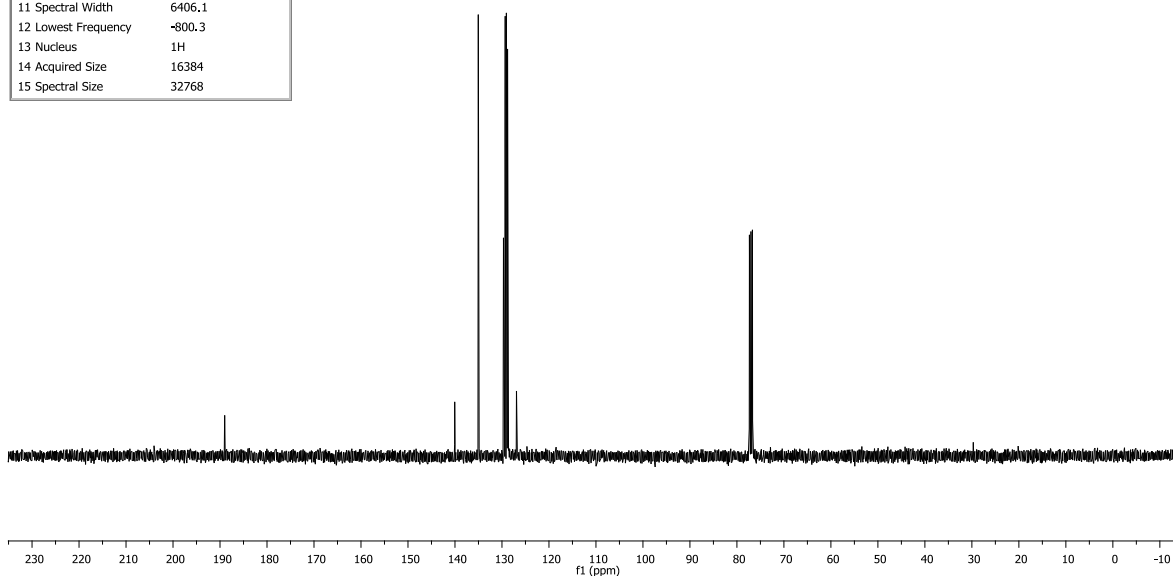

## S-Phenyl 4-bromobenzothioate (26)

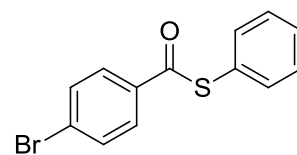

| Parameter                 | Value               |
|---------------------------|---------------------|
| 1 Title                   | MNB224.F5-11.H2     |
| 2 Origin                  | mercury             |
| 3 Owner                   |                     |
| 4 Solvent                 | cdcl3               |
| 5 Pulse Sequence          | s2pul               |
| 6 Acquisition Date        | 2012-03-09T17:10:37 |
| 7 Modification Date       |                     |
| 8 Temperature             | 25.0                |
| 9 Number of Scans         | 8                   |
| 10 Spectrometer Frequency | 400.46              |
| 11 Spectral Width         | 6406.1              |
| 12 Lowest Frequency       | ~800.3              |
| 13 Nucleus                | <sup>1</sup> H      |
| 14 Acquired Size          | 16384               |
| 15 Spectral Size          | 32768               |

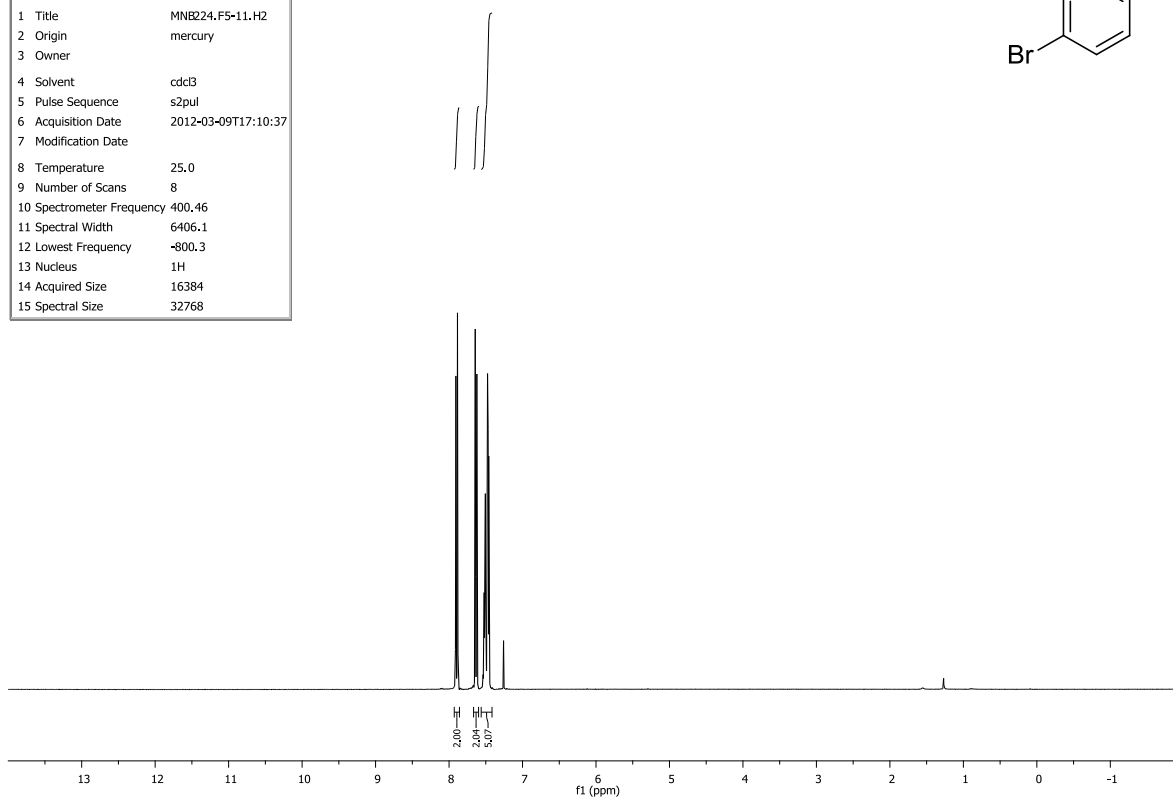

| Parameter                 | Value               |
|---------------------------|---------------------|
| 1 Title                   | MNB224.F5-11.H2     |
| 2 Origin                  | mercury             |
| 3 Owner                   |                     |
| 4 Solvent                 | cdcl3               |
| 5 Pulse Sequence          | s2pul               |
| 6 Acquisition Date        | 2012-03-09T17:10:37 |
| 7 Modification Date       |                     |
| 8 Temperature             | 25.0                |
| 9 Number of Scans         | 8                   |
| 10 Spectrometer Frequency | 400.46              |
| 11 Spectral Width         | 6406.1              |
| 12 Lowest Frequency       | ~800.3              |
| 13 Nucleus                | <sup>1</sup> H      |
| 14 Acquired Size          | 16384               |
| 15 Spectral Size          | 32768               |

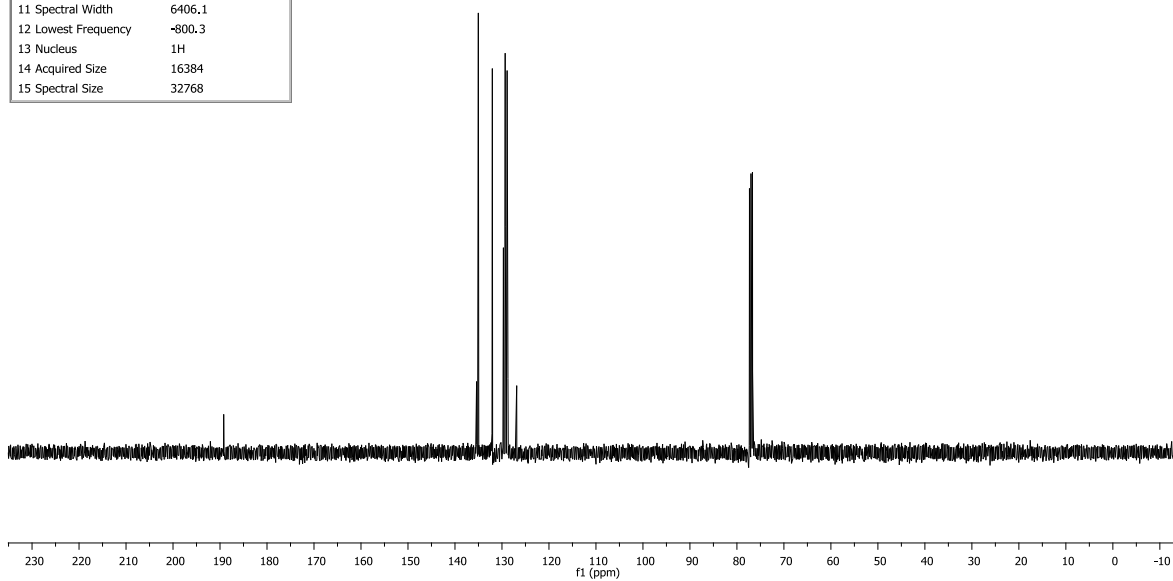

# Methyl 2-methoxy-5-((phenylthio)carbonyl)benzoate (27)

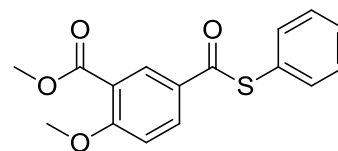

| Parameter                 | Value               |
|---------------------------|---------------------|
| 1 Title                   | MNBL92.F12-24.H     |
| 2 Origin                  | mercury             |
| 3 Owner                   |                     |
| 4 Solvent                 | cdcl3               |
| 5 Pulse Sequence          | s2pul               |
| 6 Acquisition Date        | 2011-12-01T12:44:29 |
| 7 Modification Date       |                     |
| 8 Temperature             | 25.0                |
| 9 Number of Scans         | 8                   |
| 10 Spectrometer Frequency | 400.46              |
| 11 Spectral Width         | 6406.1              |
| 12 Lowest Frequency       | ~800.3              |
| 13 Nucleus                | 1H                  |
| 14 Acquired Size          | 16384               |
| 15 Spectral Size          | 32768               |

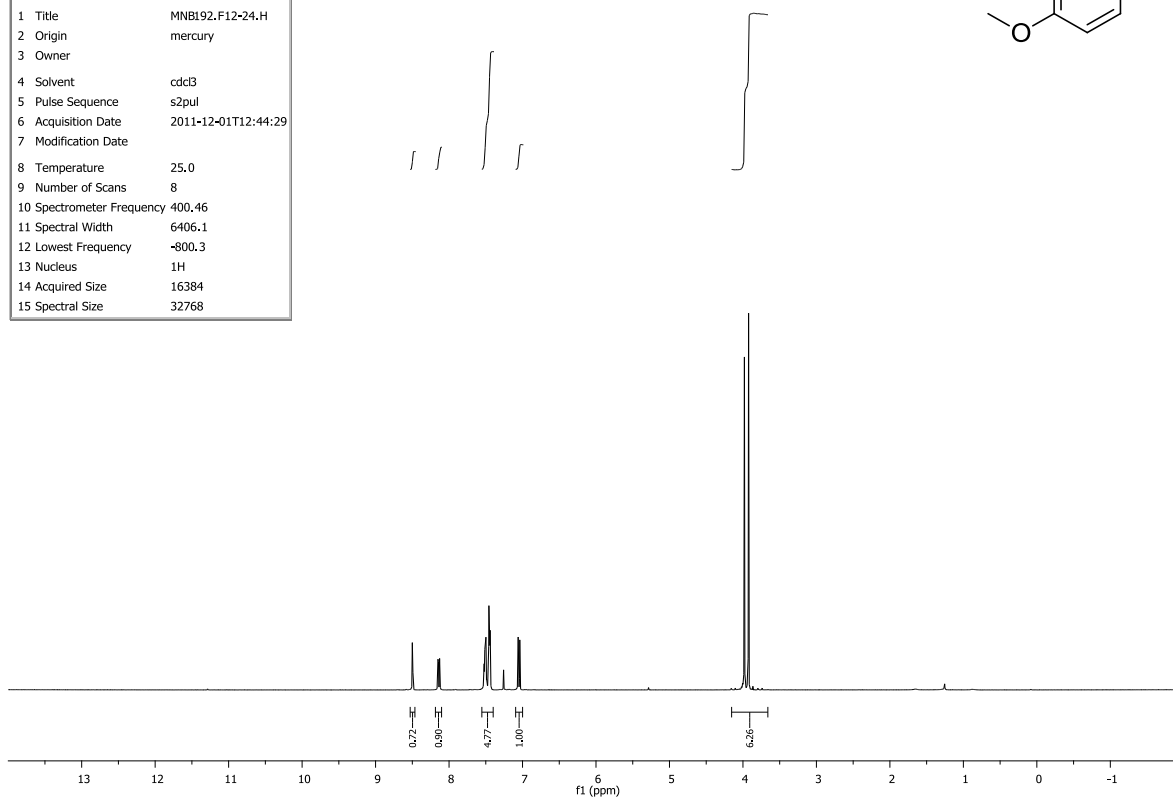

| Parameter                 | Value               |
|---------------------------|---------------------|
| 1 Title                   | MNBL92.F12-24.H     |
| 2 Origin                  | mercury             |
| 3 Owner                   |                     |
| 4 Solvent                 | cdcl3               |
| 5 Pulse Sequence          | s2pul               |
| 6 Acquisition Date        | 2011-12-01T12:44:29 |
| 7 Modification Date       |                     |
| 8 Temperature             | 25.0                |
| 9 Number of Scans         | 8                   |
| 10 Spectrometer Frequency | 400.46              |
| 11 Spectral Width         | 6406.1              |
| 12 Lowest Frequency       | ~800.3              |
| 13 Nucleus                | 1H                  |
| 14 Acquired Size          | 16384               |
| 15 Spectral Size          | 32768               |

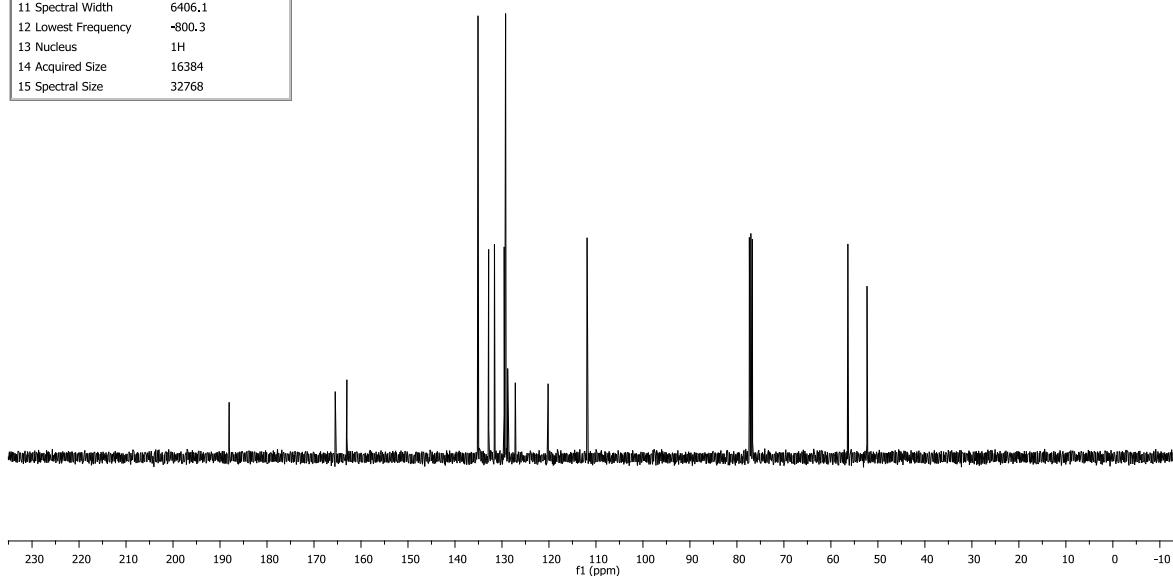

# Ethyl 4-((phenylthio)carbonyl)benzoate (28)

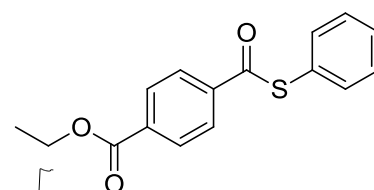

| Parameter                 | Value               |
|---------------------------|---------------------|
| 1 Title                   | MNB220.F17-33.H2    |
| 2 Origin                  | mercury             |
| 3 Owner                   |                     |
| 4 Solvent                 | cdcl3               |
| 5 Pulse Sequence          | s2pul               |
| 6 Acquisition Date        | 2012-03-23T17:55:34 |
| 7 Modification Date       |                     |
| 8 Temperature             | 25.0                |
| 9 Number of Scans         | 8                   |
| 10 Spectrometer Frequency | 400.46              |
| 11 Spectral Width         | 6406.1              |
| 12 Lowest Frequency       | ~800.3              |
| 13 Nucleus                | <sup>1</sup> H      |
| 14 Acquired Size          | 16384               |
| 15 Spectral Size          | 32768               |

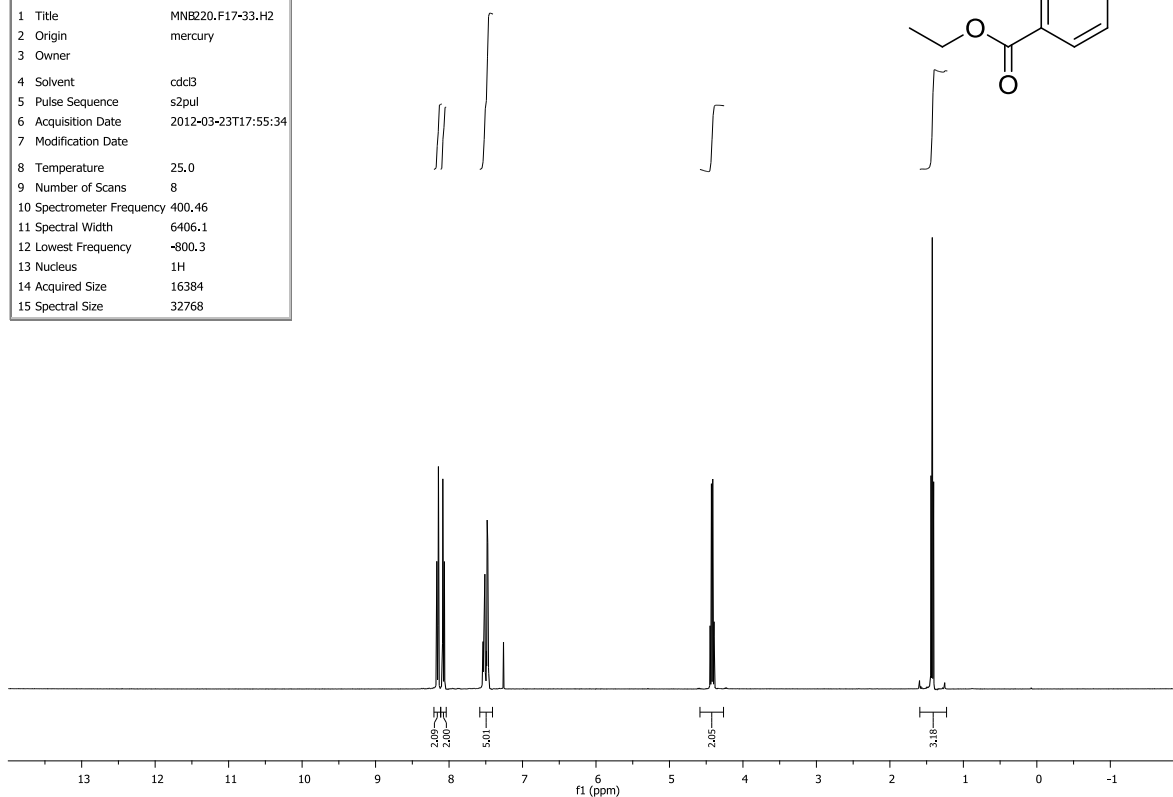

| Parameter                 | Value               |
|---------------------------|---------------------|
| 1 Title                   | MNB220.F17-33.C2    |
| 2 Origin                  | mercury             |
| 3 Owner                   |                     |
| 4 Solvent                 | cdcl3               |
| 5 Pulse Sequence          | s2pul               |
| 6 Acquisition Date        | 2012-03-23T18:16:30 |
| 7 Modification Date       |                     |
| 8 Temperature             | 25.0                |
| 9 Number of Scans         | 512                 |
| 10 Spectrometer Frequency | 100.71              |
| 11 Spectral Width         | 25188.9             |
| 12 Lowest Frequency       | ~1517.9             |
| 13 Nucleus                | <sup>13</sup> C     |
| 14 Acquired Size          | 32768               |
| 15 Spectral Size          | 65536               |

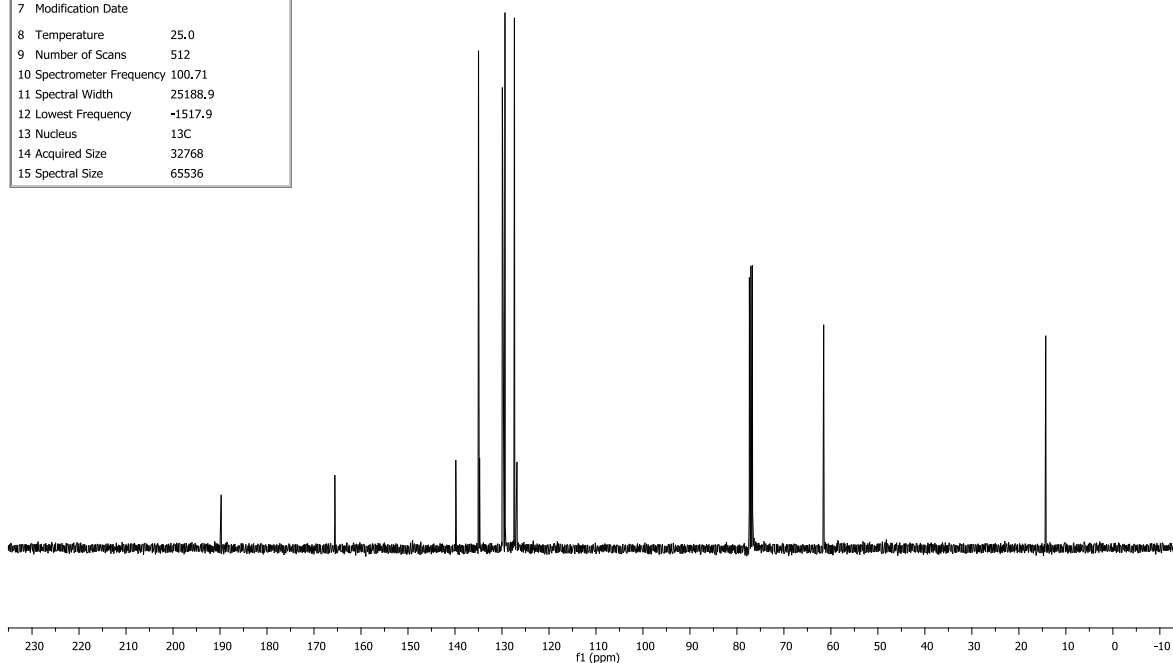

# **S-phenyl 4-acetylbenzothioate (29)**

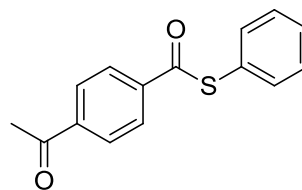

| Parameter                 | Value               |
|---------------------------|---------------------|
| 1 Title                   | MNB291.F23-36.H     |
| 2 Origin                  | mercury             |
| 3 Owner                   |                     |
| 4 Solvent                 | cdcl3               |
| 5 Pulse Sequence          | s2pul               |
| 6 Acquisition Date        | 2012-08-28T18:50:02 |
| 7 Modification Date       |                     |
| 8 Temperature             | 25.0                |
| 9 Number of Scans         | 8                   |
| 10 Spectrometer Frequency | 400.46              |
| 11 Spectral Width         | 6406.1              |
| 12 Lowest Frequency       | -800.3              |
| 13 Nucleus                | <sup>1</sup> H      |
| 14 Acquired Size          | 16384               |
| 15 Spectral Size          | 32768               |

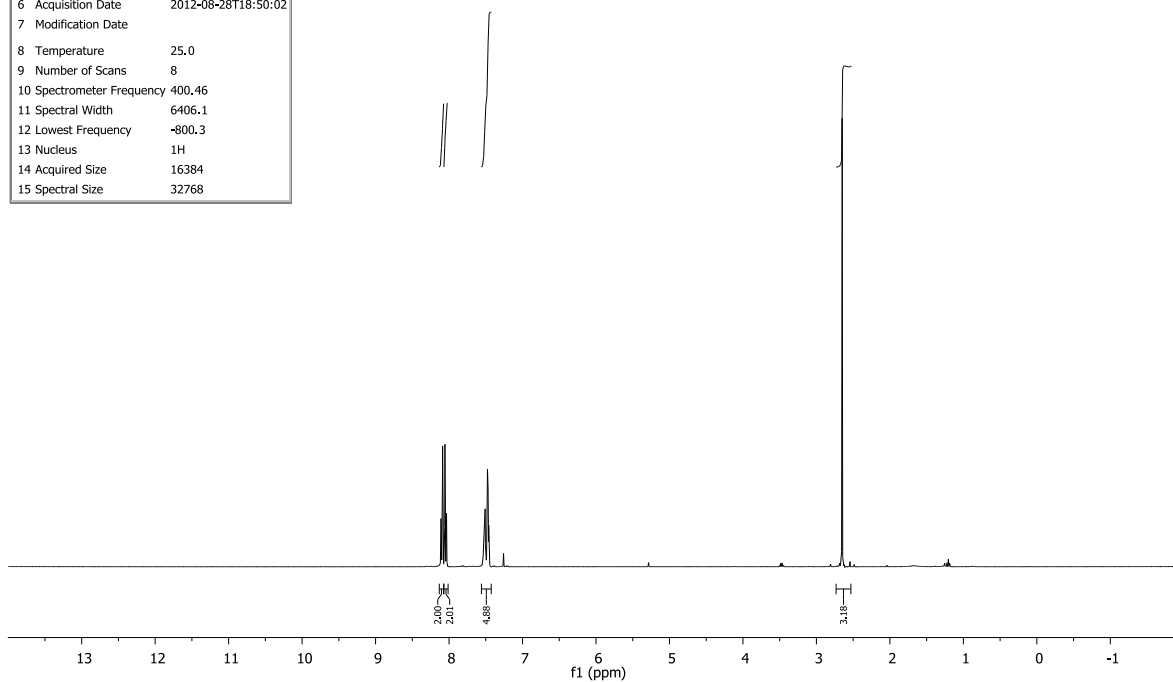

| Parameter                 | Value               |
|---------------------------|---------------------|
| 1 Title                   | MNB291.F23-36.C     |
| 2 Origin                  | mercury             |
| 3 Owner                   |                     |
| 4 Solvent                 | cdcl3               |
| 5 Pulse Sequence          | s2pul               |
| 6 Acquisition Date        | 2012-08-28T19:01:15 |
| 7 Modification Date       |                     |
| 8 Temperature             | 25.0                |
| 9 Number of Scans         | 256                 |
| 10 Spectrometer Frequency | 100.71              |
| 11 Spectral Width         | 25188.9             |
| 12 Lowest Frequency       | -1517.9             |
| 13 Nucleus                | <sup>13</sup> C     |
| 14 Acquired Size          | 32768               |
| 15 Spectral Size          | 65536               |

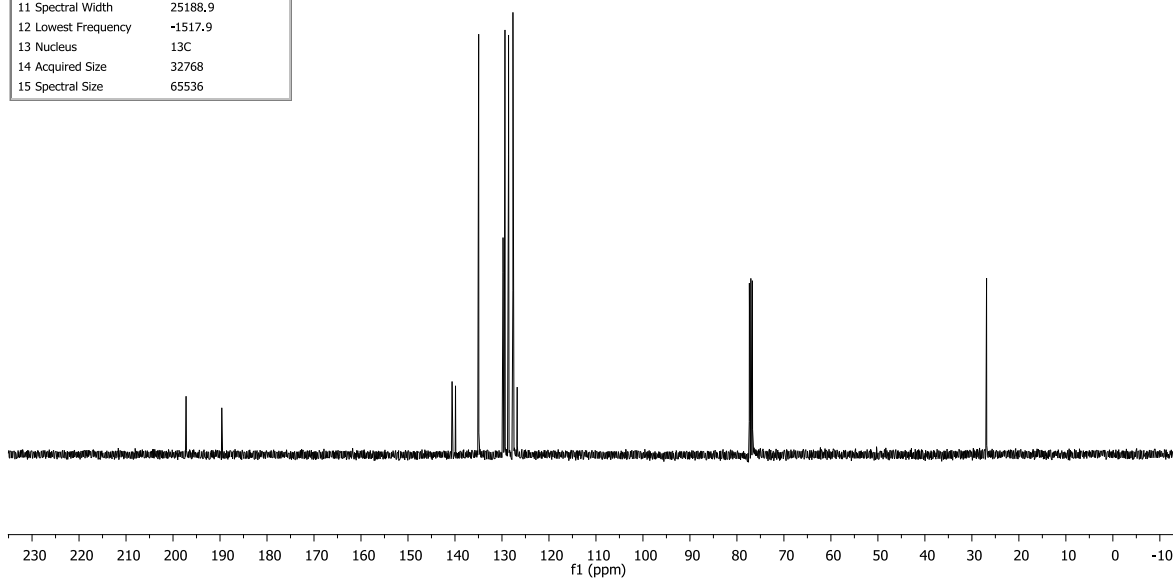

## S-Phenyl naphthalene-2-carbothioate (30)

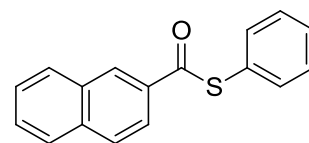

| Parameter                 | Value               |
|---------------------------|---------------------|
| 1 Title                   | MNBL75.F6-12.C      |
| 2 Origin                  | mercury             |
| 3 Owner                   |                     |
| 4 Solvent                 | cdcl3               |
| 5 Pulse Sequence          | s2pul               |
| 6 Acquisition Date        | 2011-11-03T10:48:59 |
| 7 Modification Date       |                     |
| 8 Temperature             | 25.0                |
| 9 Number of Scans         | 512                 |
| 10 Spectrometer Frequency | 100.71              |
| 11 Spectral Width         | 25188.9             |
| 12 Lowest Frequency       | -1517.9             |
| 13 Nucleus                | 13C                 |
| 14 Acquired Size          | 32768               |
| 15 Spectral Size          | 65536               |

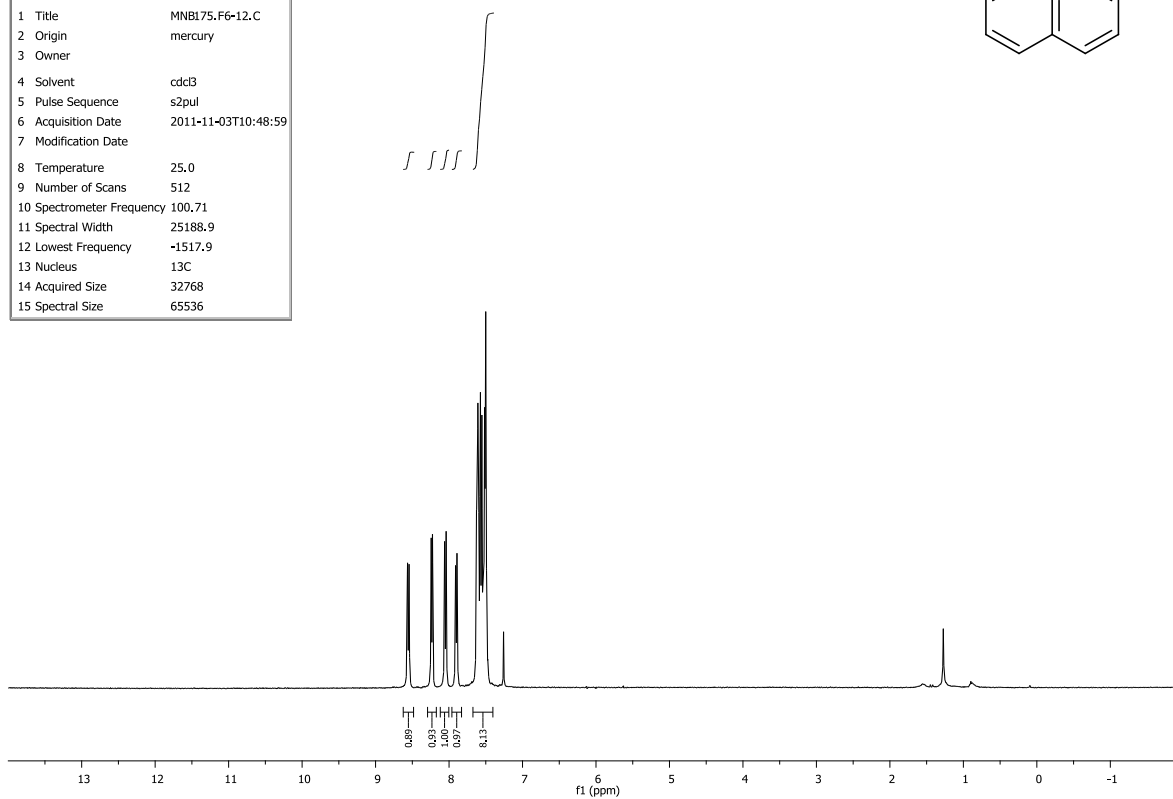

| Parameter                 | Value               |
|---------------------------|---------------------|
| 1 Title                   | MNBL75.F6-12.H2     |
| 2 Origin                  | mercury             |
| 3 Owner                   |                     |
| 4 Solvent                 | cdcl3               |
| 5 Pulse Sequence          | s2pul               |
| 6 Acquisition Date        | 2012-03-09T17:05:30 |
| 7 Modification Date       |                     |
| 8 Temperature             | 25.0                |
| 9 Number of Scans         | 8                   |
| 10 Spectrometer Frequency | 400.46              |
| 11 Spectral Width         | 6406.1              |
| 12 Lowest Frequency       | -800.3              |
| 13 Nucleus                | 1H                  |
| 14 Acquired Size          | 16384               |
| 15 Spectral Size          | 32768               |

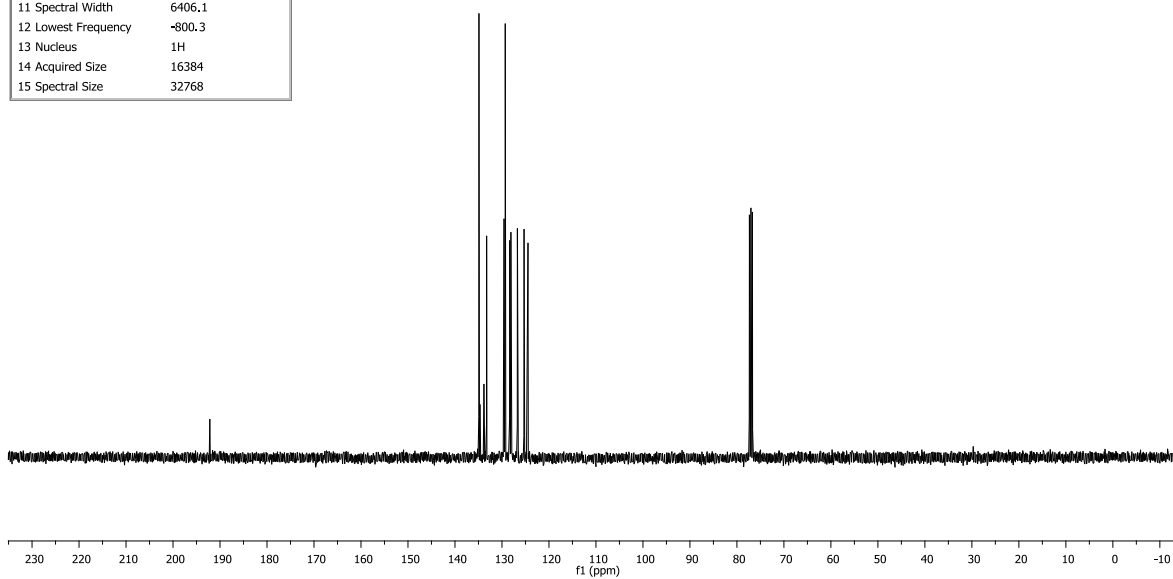

# **S-phenyl 4-nitrobenzothioate (31)**

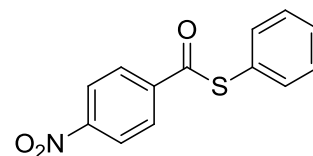

| Parameter                 | Value               |
|---------------------------|---------------------|
| 1 Title                   | MNB317.F17-28.F     |
| 2 Origin                  | mercury             |
| 3 Owner                   |                     |
| 4 Solvent                 | cdcl3               |
| 5 Pulse Sequence          | s2pul               |
| 6 Acquisition Date        | 2012-10-25T12:58:58 |
| 7 Modification Date       |                     |
| 8 Temperature             | 25.0                |
| 9 Number of Scans         | 8                   |
| 10 Spectrometer Frequency | 400.46              |
| 11 Spectral Width         | 6406.1              |
| 12 Lowest Frequency       | ~800.3              |
| 13 Nucleus                | <sup>1</sup> H      |
| 14 Acquired Size          | 16384               |
| 15 Spectral Size          | 32768               |

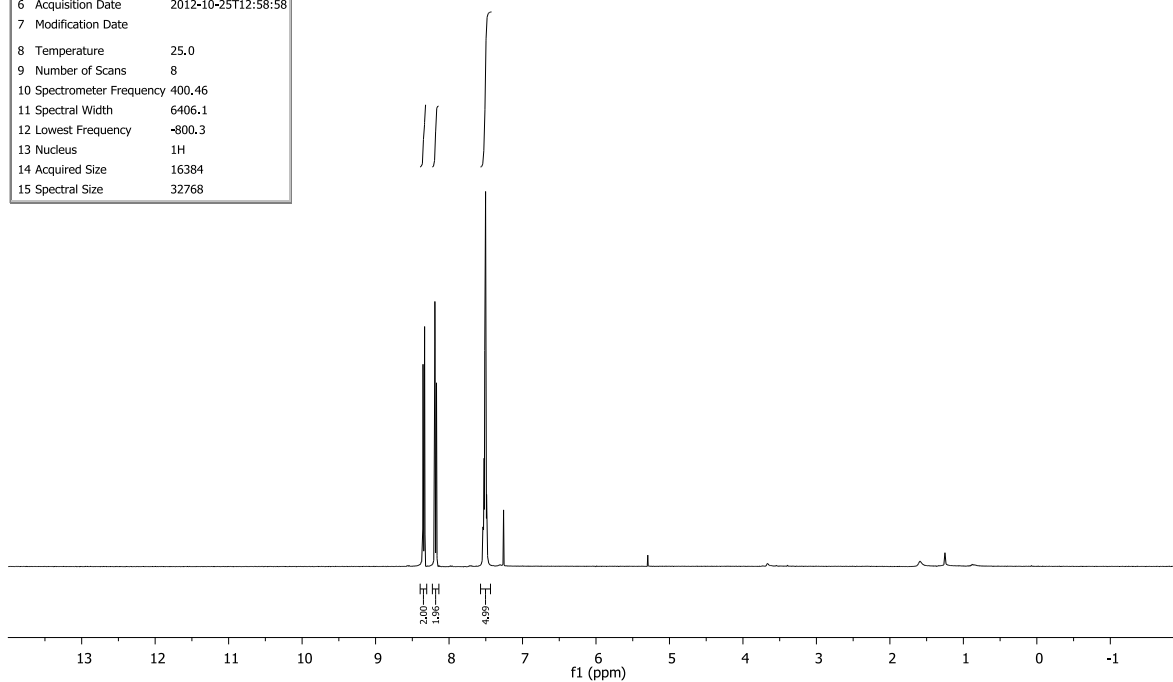

| Parameter                 | Value               |
|---------------------------|---------------------|
| 1 Title                   | MNB290.F13-21.C     |
| 2 Origin                  | mercury             |
| 3 Owner                   |                     |
| 4 Solvent                 | cdcl3               |
| 5 Pulse Sequence          | s2pul               |
| 6 Acquisition Date        | 2012-08-28T11:07:54 |
| 7 Modification Date       |                     |
| 8 Temperature             | 25.0                |
| 9 Number of Scans         | 444                 |
| 10 Spectrometer Frequency | 100.71              |
| 11 Spectral Width         | 25188.9             |
| 12 Lowest Frequency       | ~1517.9             |
| 13 Nucleus                | <sup>13</sup> C     |
| 14 Acquired Size          | 32768               |
| 15 Spectral Size          | 65536               |

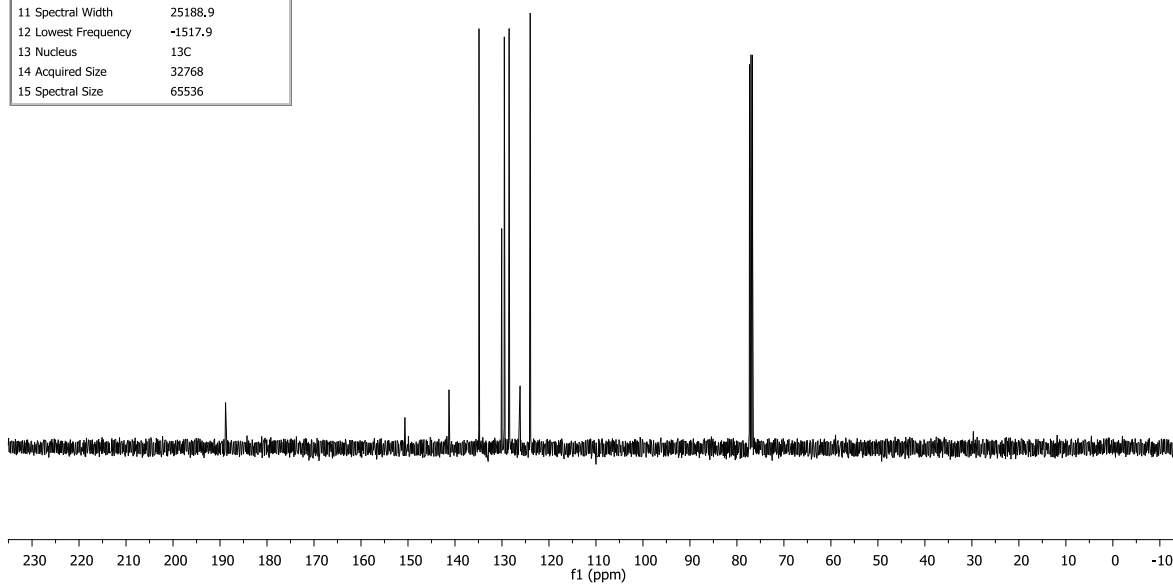

# **S-(4-fluorophenyl) 4-methoxybenzothioate (32)**

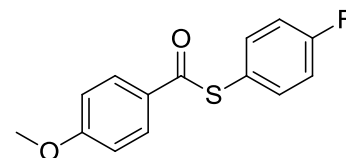

| Parameter                 | Value               |
|---------------------------|---------------------|
| 1 Title                   | MNB313.F15-23.H     |
| 2 Origin                  | mercury             |
| 3 Owner                   |                     |
| 4 Solvent                 | cdcl3               |
| 5 Pulse Sequence          | s2pul               |
| 6 Acquisition Date        | 2012-10-24T16:32:14 |
| 7 Modification Date       |                     |
| 8 Temperature             | 25.0                |
| 9 Number of Scans         | 8                   |
| 10 Spectrometer Frequency | 400.46              |
| 11 Spectral Width         | 6406.1              |
| 12 Lowest Frequency       | ~800.3              |
| 13 Nucleus                | <sup>1</sup> H      |
| 14 Acquired Size          | 16384               |
| 15 Spectral Size          | 32768               |

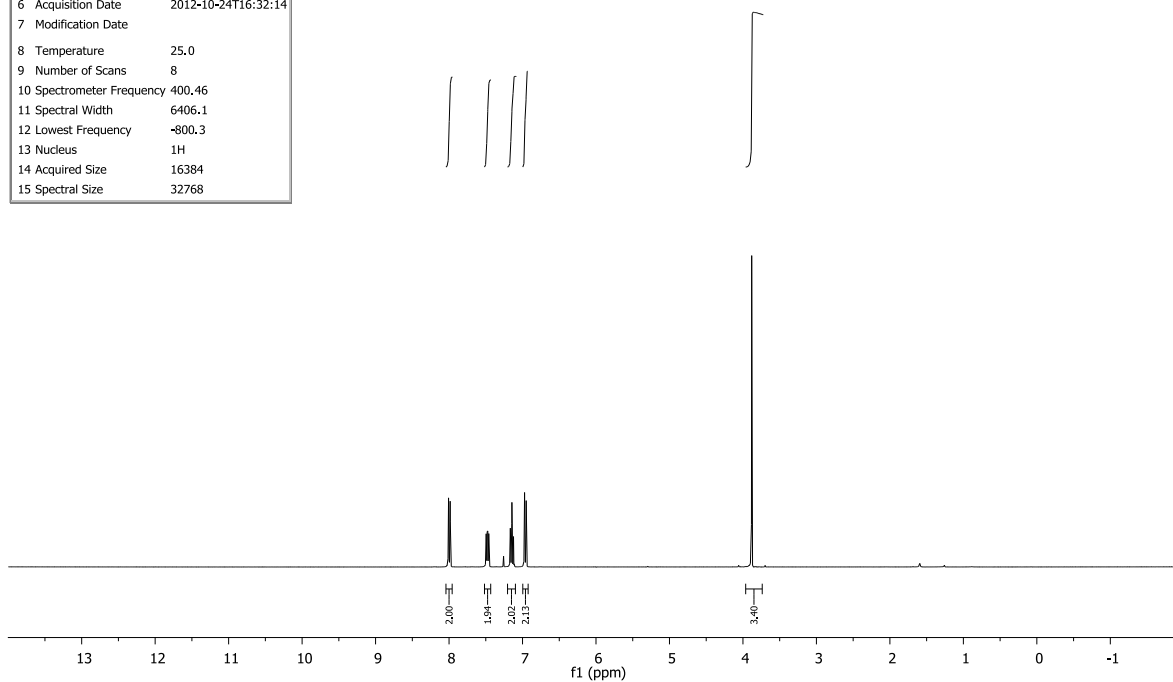

| Parameter                 | Value                |
|---------------------------|----------------------|
| 1 Title                   | MNB313.F15-23.o/ n.C |
| 2 Origin                  | mercury              |
| 3 Owner                   |                      |
| 4 Solvent                 | cdcl3                |
| 5 Pulse Sequence          | s2pul                |
| 6 Acquisition Date        | 2012-10-24T16:40:55  |
| 7 Modification Date       |                      |
| 8 Temperature             | 25.0                 |
| 9 Number of Scans         | 23980                |
| 10 Spectrometer Frequency | 100.71               |
| 11 Spectral Width         | 25188.9              |
| 12 Lowest Frequency       | ~1517.9              |
| 13 Nucleus                | <sup>13</sup> C      |
| 14 Acquired Size          | 32768                |
| 15 Spectral Size          | 65536                |

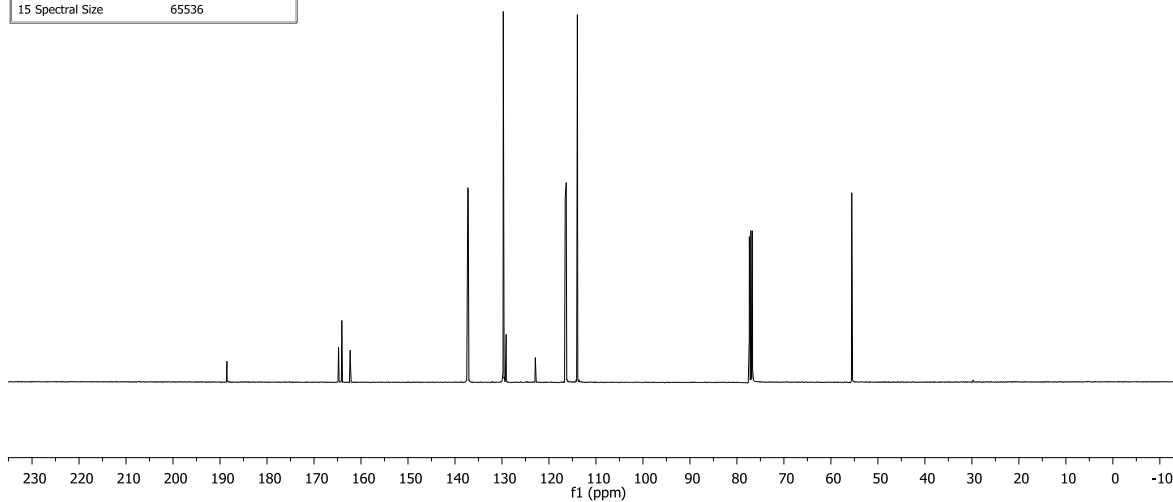

|    | Parameter              | Value               |
|----|------------------------|---------------------|
| 1  | Title                  | MNB313.F15-23.F     |
| 2  | Origin                 | mercury             |
| 3  | Owner                  |                     |
| 4  | Solvent                | cdcl3               |
| 5  | Pulse Sequence         | s2pul               |
| 6  | Acquisition Date       | 2012-10-24T16:34:41 |
| 7  | Modification Date      |                     |
| 8  | Temperature            | 25.0                |
| 9  | Number of Scans        | 16                  |
| 10 | Spectrometer Frequency | 376.78              |
| 11 | Spectral Width         | 86956.5             |
| 12 | Lowest Frequency       | -75507.1            |
| 13 | Nucleus                | 19F                 |
| 14 | Acquired Size          | 64000               |
| 15 | Spectral Size          | 131072              |

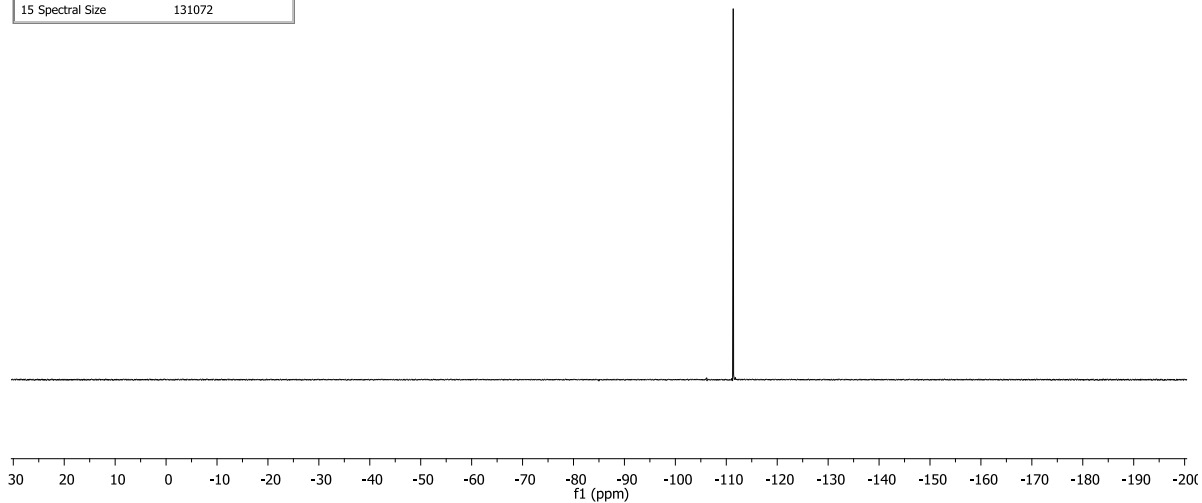

# **S-Phenyl 4-(phenylthio)benzothioate (33)**

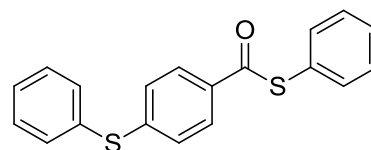

| Parameter                 | Value               |
|---------------------------|---------------------|
| 1 Title                   | MNBI89,F5-13.H      |
| 2 Origin                  | mercury             |
| 3 Owner                   |                     |
| 4 Solvent                 | cdcl3               |
| 5 Pulse Sequence          | s2pul               |
| 6 Acquisition Date        | 2011-11-24T16:33:55 |
| 7 Modification Date       |                     |
| 8 Temperature             | 25.0                |
| 9 Number of Scans         | 8                   |
| 10 Spectrometer Frequency | 400.46              |
| 11 Spectral Width         | 6406.1              |
| 12 Lowest Frequency       | ~800.3              |
| 13 Nucleus                | 1H                  |
| 14 Acquired Size          | 16384               |
| 15 Spectral Size          | 32768               |

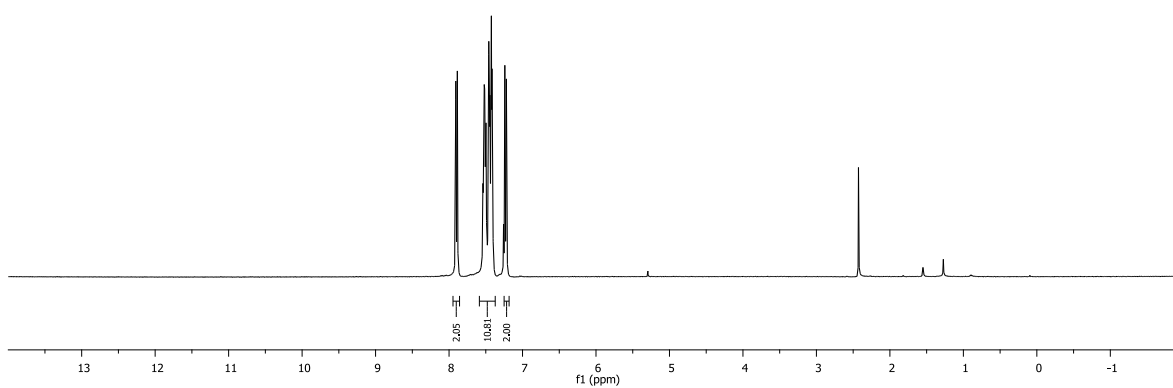

| Parameter                 | Value               |
|---------------------------|---------------------|
| 1 Title                   | MNBI89,F5-13.H      |
| 2 Origin                  | mercury             |
| 3 Owner                   |                     |
| 4 Solvent                 | cdcl3               |
| 5 Pulse Sequence          | s2pul               |
| 6 Acquisition Date        | 2011-11-24T16:33:55 |
| 7 Modification Date       |                     |
| 8 Temperature             | 25.0                |
| 9 Number of Scans         | 8                   |
| 10 Spectrometer Frequency | 400.46              |
| 11 Spectral Width         | 6406.1              |
| 12 Lowest Frequency       | ~800.3              |
| 13 Nucleus                | 1H                  |
| 14 Acquired Size          | 16384               |
| 15 Spectral Size          | 32768               |

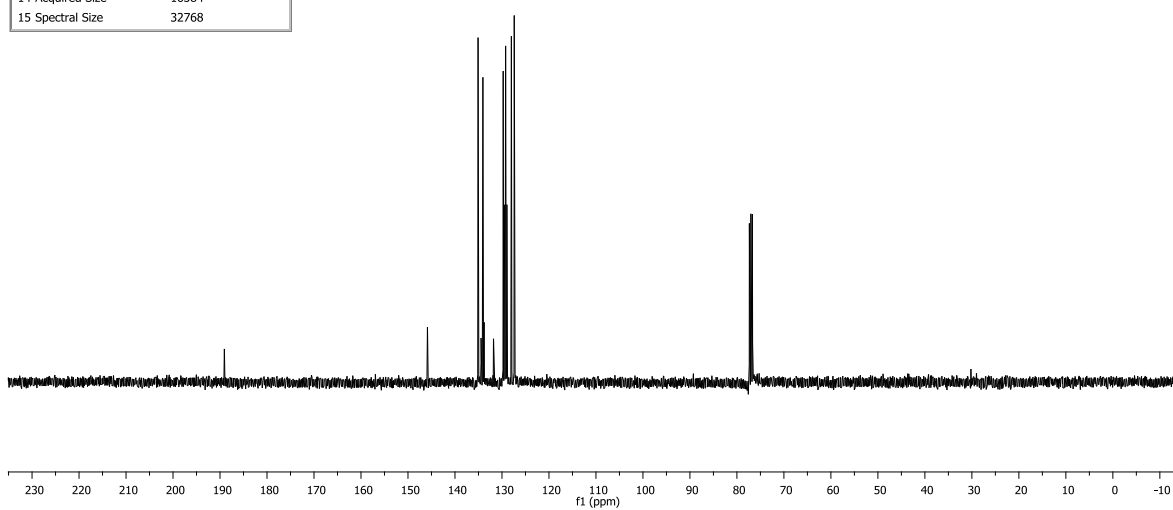

# **S-Phenyl 3-(phenylthio)benzothioate (34)**

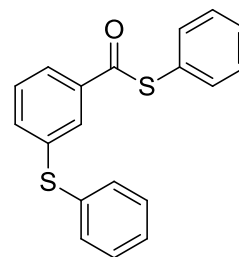

| Parameter                 | Value               |
|---------------------------|---------------------|
| 1 Title                   | MNB255,F7-12,H2     |
| 2 Origin                  | mercury             |
| 3 Owner                   |                     |
| 4 Solvent                 | cdcl3               |
| 5 Pulse Sequence          | s2pul               |
| 6 Acquisition Date        | 2012-05-07T10:00:21 |
| 7 Modification Date       |                     |
| 8 Temperature             | 25.0                |
| 9 Number of Scans         | 8                   |
| 10 Spectrometer Frequency | 400.46              |
| 11 Spectral Width         | 6406.1              |
| 12 Lowest Frequency       | ~800.3              |
| 13 Nucleus                | 1H                  |
| 14 Acquired Size          | 16384               |
| 15 Spectral Size          | 32768               |

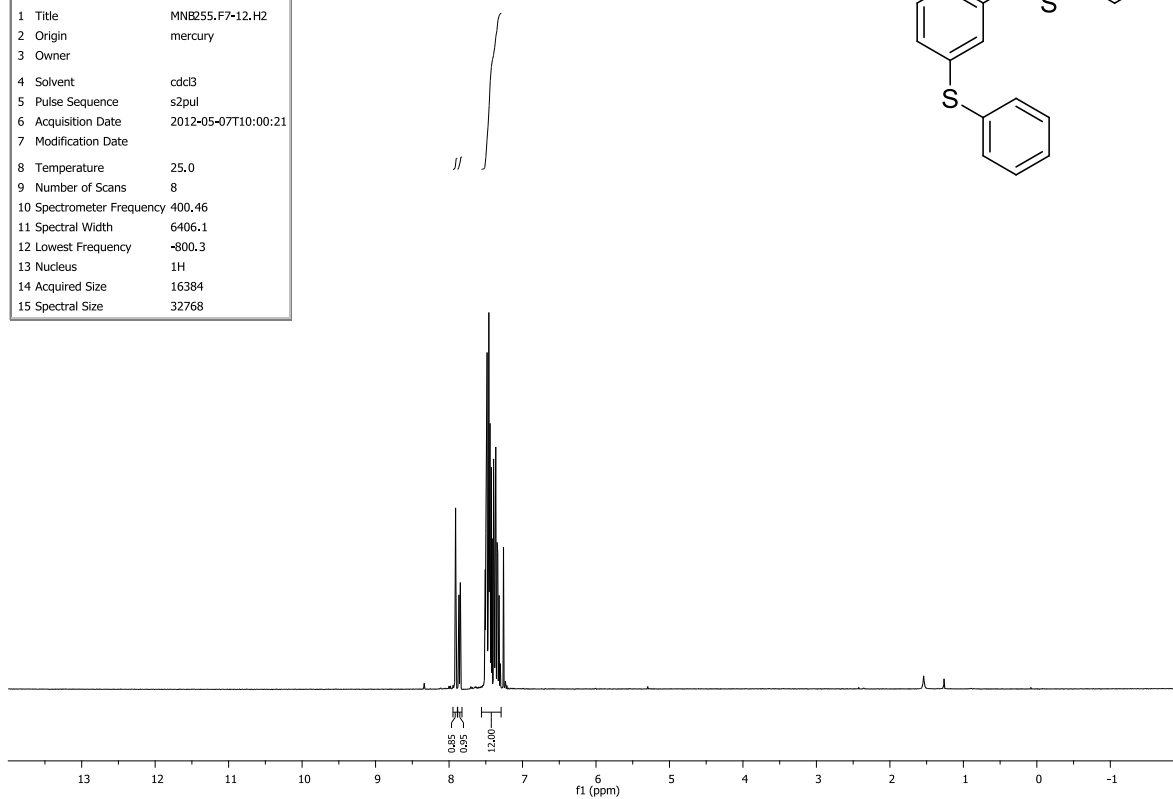

| Parameter                 | Value               |
|---------------------------|---------------------|
| 1 Title                   | MNB255,F6-14,H      |
| 2 Origin                  | mercury             |
| 3 Owner                   |                     |
| 4 Solvent                 | cdcl3               |
| 5 Pulse Sequence          | s2pul               |
| 6 Acquisition Date        | 2012-04-19T09:03:57 |
| 7 Modification Date       |                     |
| 8 Temperature             | 25.0                |
| 9 Number of Scans         | 8                   |
| 10 Spectrometer Frequency | 400.46              |
| 11 Spectral Width         | 6406.1              |
| 12 Lowest Frequency       | ~800.3              |
| 13 Nucleus                | 1H                  |
| 14 Acquired Size          | 16384               |
| 15 Spectral Size          | 32768               |

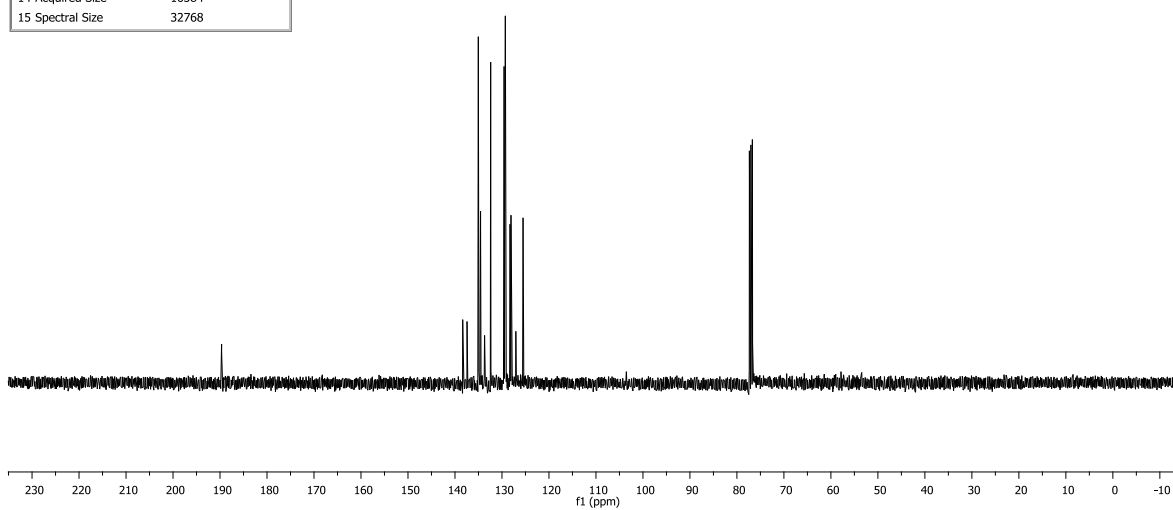

# **S-Phenyl 2-(phenylthio)benzothioate (35)**

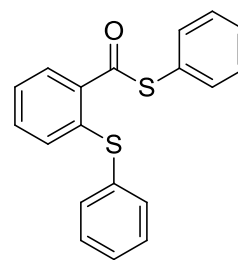

| Parameter                 | Value               |
|---------------------------|---------------------|
| 1 Title                   | MNB256.F6-14.C      |
| 2 Origin                  | mercury             |
| 3 Owner                   |                     |
| 4 Solvent                 | cdcl3               |
| 5 Pulse Sequence          | s2pul               |
| 6 Acquisition Date        | 2012-04-19T09:14:53 |
| 7 Modification Date       |                     |
| 8 Temperature             | 25.0                |
| 9 Number of Scans         | 256                 |
| 10 Spectrometer Frequency | 100.71              |
| 11 Spectral Width         | 25188.9             |
| 12 Lowest Frequency       | -1517.9             |
| 13 Nucleus                | 13C                 |
| 14 Acquired Size          | 32768               |
| 15 Spectral Size          | 65536               |

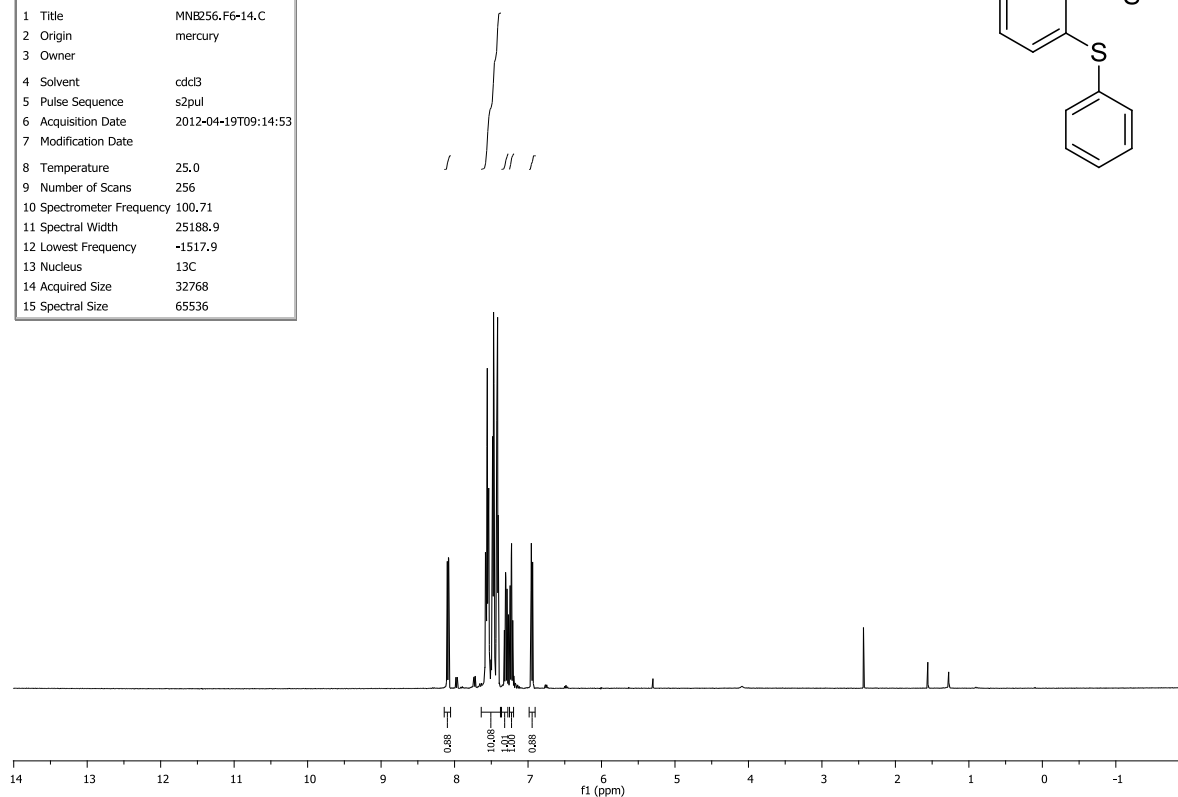

| Parameter                 | Value               |
|---------------------------|---------------------|
| 1 Title                   | MNB256.F6-14.C      |
| 2 Origin                  | mercury             |
| 3 Owner                   |                     |
| 4 Solvent                 | cdcl3               |
| 5 Pulse Sequence          | s2pul               |
| 6 Acquisition Date        | 2012-04-19T09:14:53 |
| 7 Modification Date       |                     |
| 8 Temperature             | 25.0                |
| 9 Number of Scans         | 256                 |
| 10 Spectrometer Frequency | 100.71              |
| 11 Spectral Width         | 25188.9             |
| 12 Lowest Frequency       | -1517.9             |
| 13 Nucleus                | 13C                 |
| 14 Acquired Size          | 32768               |
| 15 Spectral Size          | 65536               |

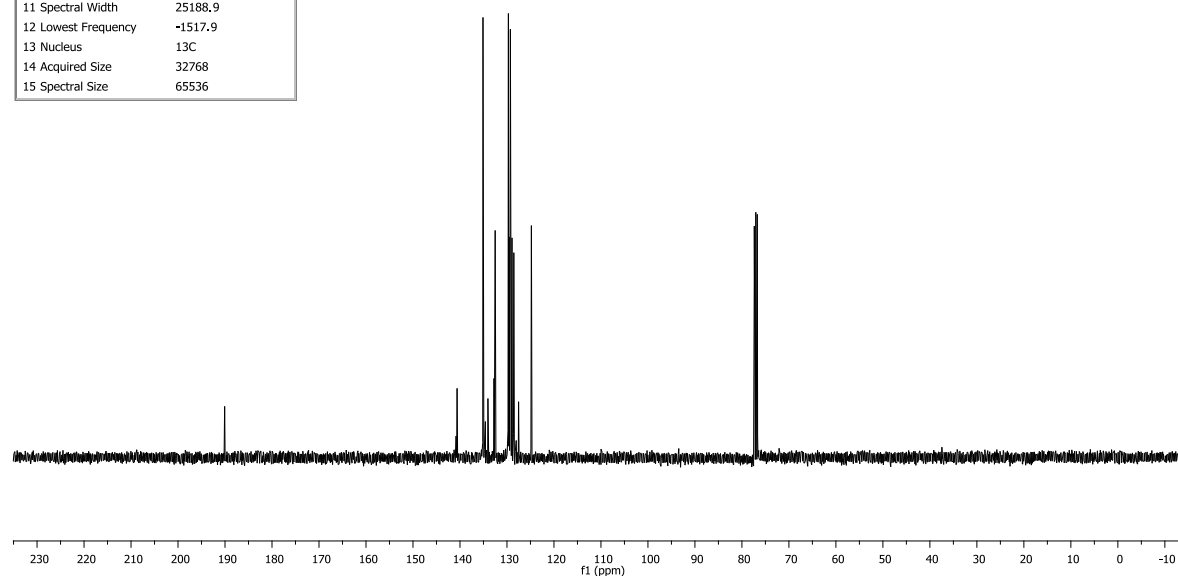

**S-(4-Methoxyphenyl) 4-((4-methoxyphenyl)thio)benzothioate (36)**

| Parameter                 | Value               |
|---------------------------|---------------------|
| 1 Title                   | MNB265frac31-48-    |
| 2 Origin                  | mercury             |
| 3 Owner                   |                     |
| 4 Solvent                 | cdcl3               |
| 5 Pulse Sequence          | s2pul               |
| 6 Acquisition Date        | 2012-05-16T12:07:01 |
| 7 Modification Date       |                     |
| 8 Temperature             | 25.0                |
| 9 Number of Scans         | 8                   |
| 10 Spectrometer Frequency | 400.46              |
| 11 Spectral Width         | 6406.1              |
| 12 Lowest Frequency       | ~800.3              |
| 13 Nucleus                | <sup>1</sup> H      |
| 14 Acquired Size          | 16384               |
| 15 Spectral Size          | 32768               |

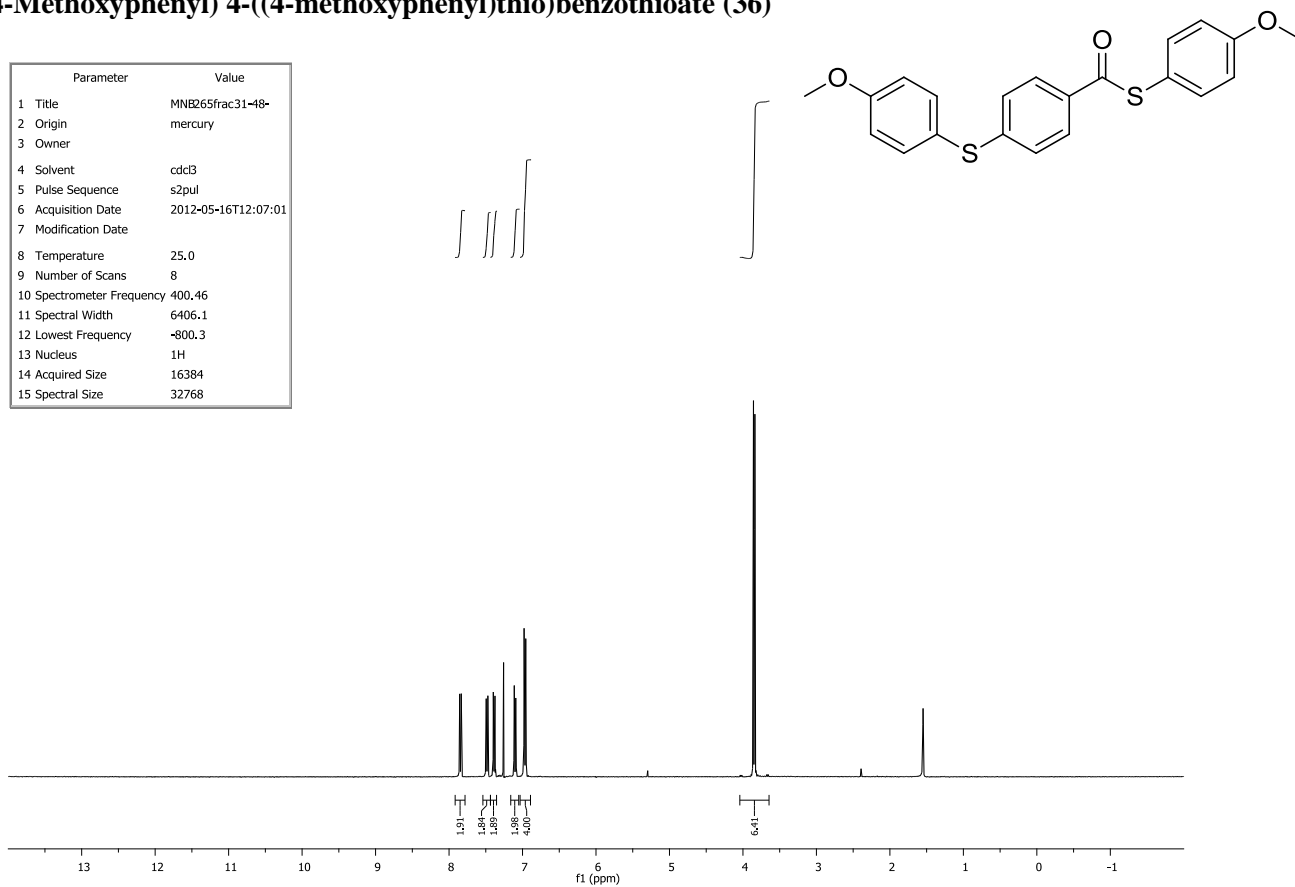

| Parameter                 | Value               |
|---------------------------|---------------------|
| 1 Title                   | MNB265frac31-48_C-  |
| 2 Origin                  | mercury             |
| 3 Owner                   |                     |
| 4 Solvent                 | cdcl3               |
| 5 Pulse Sequence          | s2pul               |
| 6 Acquisition Date        | 2012-05-16T14:26:09 |
| 7 Modification Date       |                     |
| 8 Temperature             | 25.0                |
| 9 Number of Scans         | 104                 |
| 10 Spectrometer Frequency | 100.71              |
| 11 Spectral Width         | 25188.9             |
| 12 Lowest Frequency       | ~1504.6             |
| 13 Nucleus                | <sup>13</sup> C     |
| 14 Acquired Size          | 32768               |
| 15 Spectral Size          | 65536               |

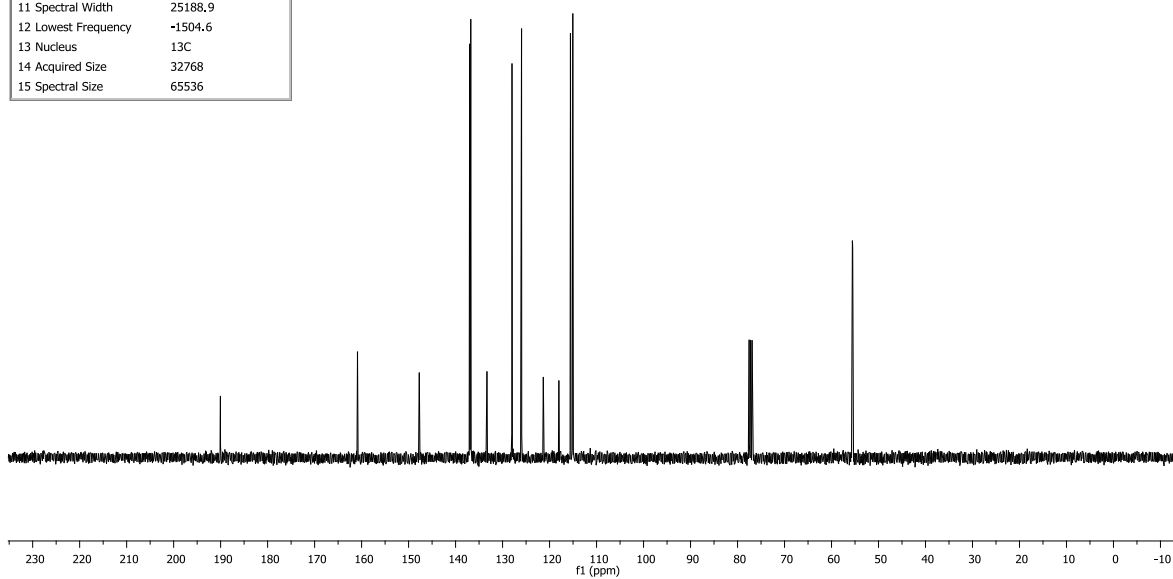

# **S,S-diphenyl benzene-1,4-bis(carbothioate) (37)**

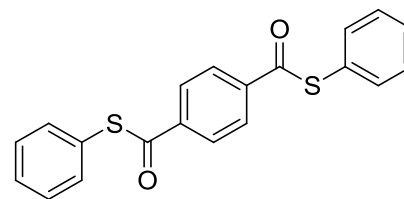

| Parameter                 | Value               |
|---------------------------|---------------------|
| 1 Title                   | MNB316.F13-28.H     |
| 2 Origin                  | mercury             |
| 3 Owner                   |                     |
| 4 Solvent                 | cdcl3               |
| 5 Pulse Sequence          | s2pul               |
| 6 Acquisition Date        | 2012-10-26T08:29:39 |
| 7 Modification Date       |                     |
| 8 Temperature             | 25.0                |
| 9 Number of Scans         | 8                   |
| 10 Spectrometer Frequency | 400.46              |
| 11 Spectral Width         | 6406.1              |
| 12 Lowest Frequency       | ~800.3              |
| 13 Nucleus                | <sup>1</sup> H      |
| 14 Acquired Size          | 16384               |
| 15 Spectral Size          | 32768               |

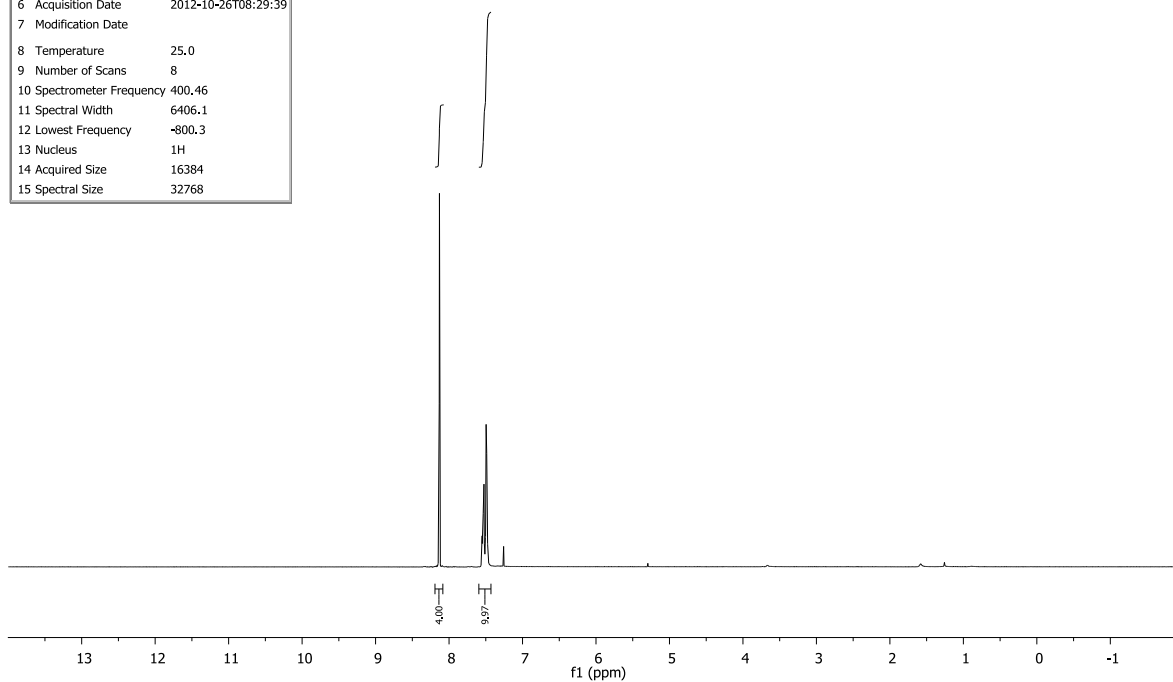

| Parameter                 | Value               |
|---------------------------|---------------------|
| 1 Title                   | MNB316.F13-28.C     |
| 2 Origin                  | mercury             |
| 3 Owner                   |                     |
| 4 Solvent                 | cdcl3               |
| 5 Pulse Sequence          | s2pul               |
| 6 Acquisition Date        | 2012-10-26T08:30:23 |
| 7 Modification Date       |                     |
| 8 Temperature             | 25.0                |
| 9 Number of Scans         | 236                 |
| 10 Spectrometer Frequency | 100.71              |
| 11 Spectral Width         | 25188.9             |
| 12 Lowest Frequency       | ~1517.9             |
| 13 Nucleus                | <sup>13</sup> C     |
| 14 Acquired Size          | 32768               |
| 15 Spectral Size          | 65536               |

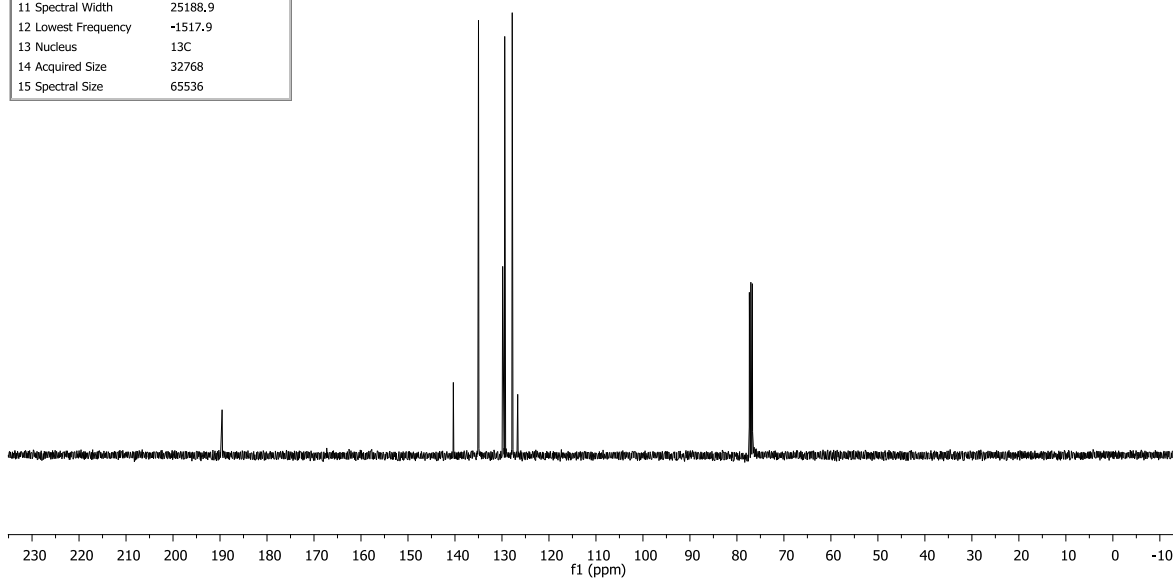

# ***N*-hexyl-4-methoxybenzamide (38)**

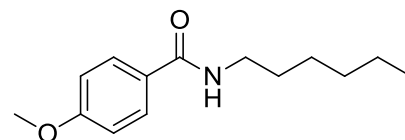

| Parameter                 | Value               |
|---------------------------|---------------------|
| 1 Title                   | RH915a-             |
| 2 Origin                  | mercury             |
| 3 Owner                   |                     |
| 4 Solvent                 | cdcl3               |
| 5 Pulse Sequence          | s2pul               |
| 6 Acquisition Date        | 2012-06-27T09:34:42 |
| 7 Modification Date       |                     |
| 8 Temperature             | 25.0                |
| 9 Number of Scans         | 8                   |
| 10 Spectrometer Frequency | 400.46              |
| 11 Spectral Width         | 6406.1              |
| 12 Lowest Frequency       | ~807.1              |
| 13 Nucleus                | <sup>1</sup> H      |
| 14 Acquired Size          | 16384               |
| 15 Spectral Size          | 32768               |

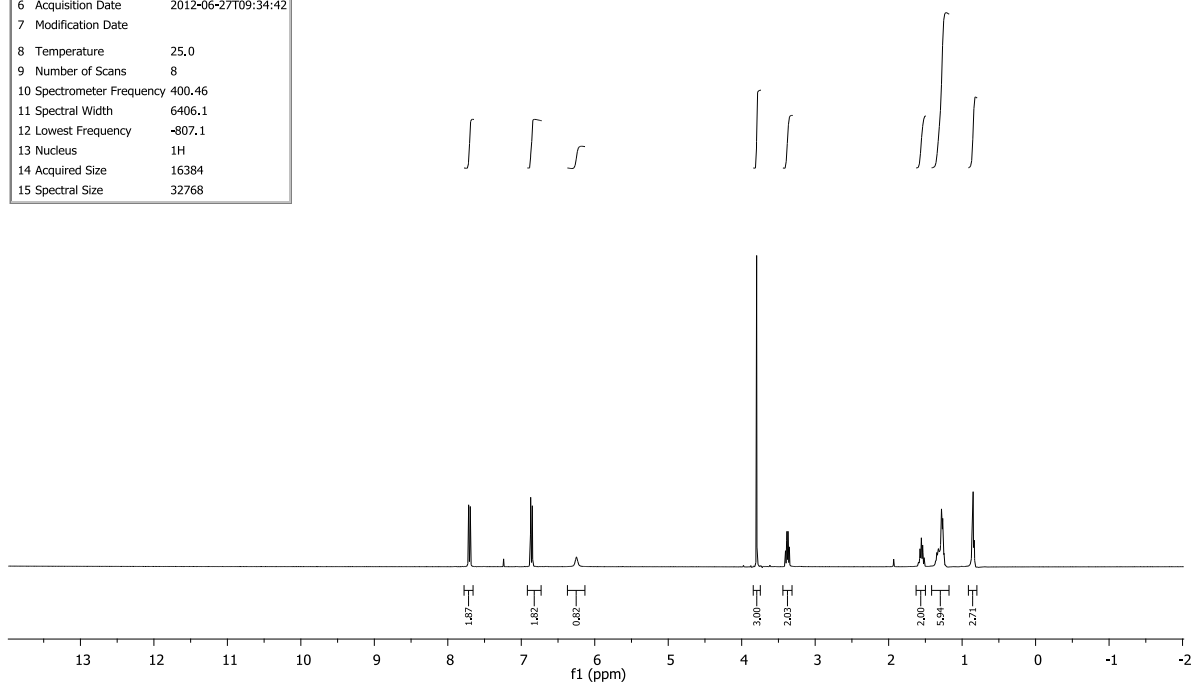

| Parameter                 | Value               |
|---------------------------|---------------------|
| 1 Title                   | carbon571a          |
| 2 Origin                  | mercury             |
| 3 Owner                   |                     |
| 4 Solvent                 | CDCl3               |
| 5 Pulse Sequence          | s2pul               |
| 6 Acquisition Date        | 2010-08-05T07:54:21 |
| 7 Modification Date       |                     |
| 8 Temperature             | 26.0                |
| 9 Number of Scans         | 456                 |
| 10 Spectrometer Frequency | 100.71              |
| 11 Spectral Width         | 25188.9             |
| 12 Lowest Frequency       | ~1527.6             |
| 13 Nucleus                | <sup>13</sup> C     |
| 14 Acquired Size          | 30211               |
| 15 Spectral Size          | 65536               |

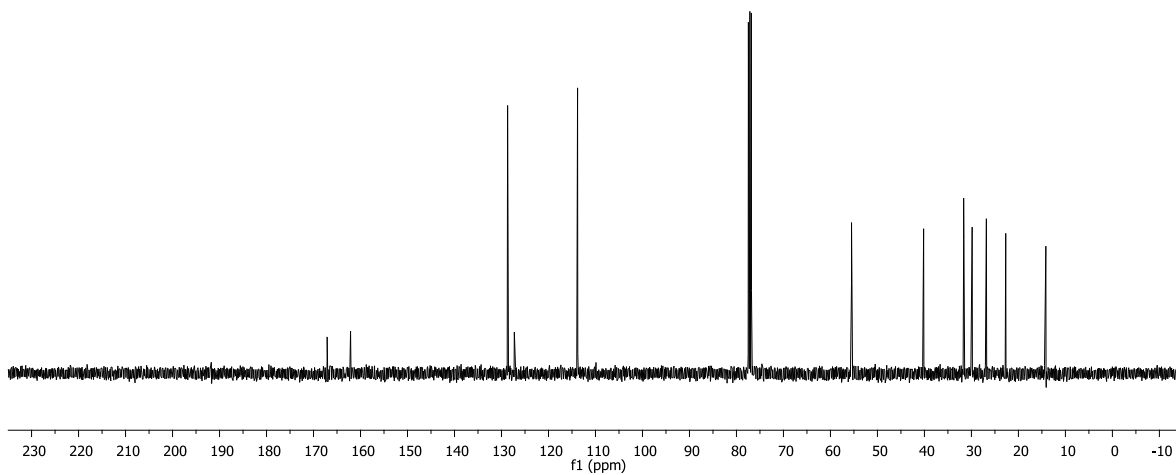

**(4-(2-hydroxyphenyl)piperazin-1-yl)(4-methoxyphenyl)methanone (39)**

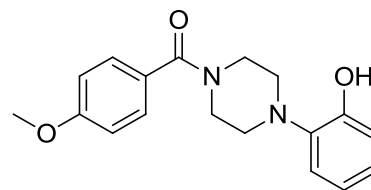

| Parameter                 | Value               |
|---------------------------|---------------------|
| 1 Title                   | RH915a-             |
| 2 Origin                  | mercury             |
| 3 Owner                   |                     |
| 4 Solvent                 | cdcl3               |
| 5 Pulse Sequence          | s2pul               |
| 6 Acquisition Date        | 2012-06-27T09:34:42 |
| 7 Modification Date       |                     |
| 8 Temperature             | 25.0                |
| 9 Number of Scans         | 8                   |
| 10 Spectrometer Frequency | 400.46              |
| 11 Spectral Width         | 6406.1              |
| 12 Lowest Frequency       | -807.1              |
| 13 Nucleus                | 1H                  |
| 14 Acquired Size          | 16384               |
| 15 Spectral Size          | 32768               |

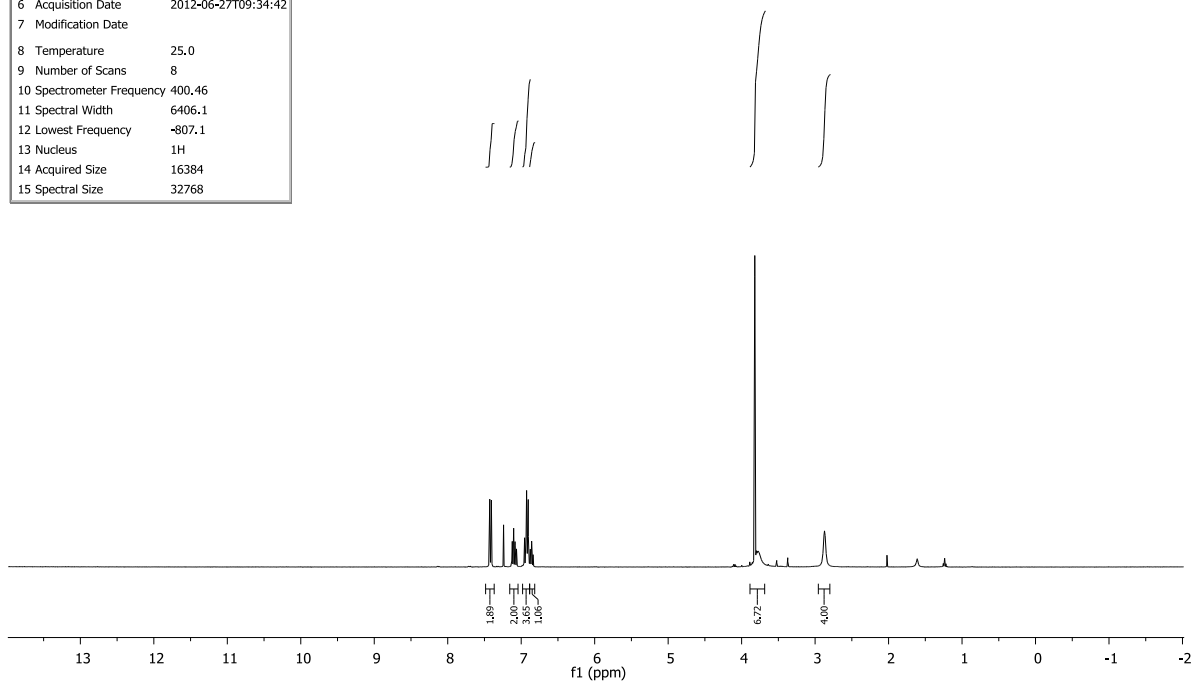

| Parameter                 | Value               |
|---------------------------|---------------------|
| 1 Title                   | carbon928a-         |
| 2 Origin                  | mercury             |
| 3 Owner                   |                     |
| 4 Solvent                 | cdcl3               |
| 5 Pulse Sequence          | s2pul               |
| 6 Acquisition Date        | 2012-10-10T08:06:37 |
| 7 Modification Date       |                     |
| 8 Temperature             | 25.0                |
| 9 Number of Scans         | 328                 |
| 10 Spectrometer Frequency | 100.71              |
| 11 Spectral Width         | 25188.9             |
| 12 Lowest Frequency       | -1497.1             |
| 13 Nucleus                | 13C                 |
| 14 Acquired Size          | 32768               |
| 15 Spectral Size          | 65536               |

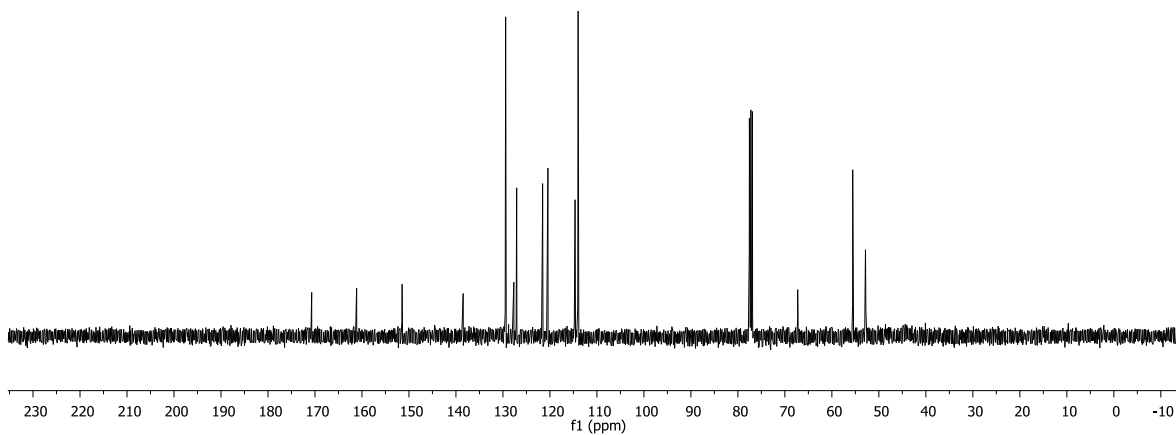

# 4-methoxy-*N,N*-dimethylbenzamide (40)

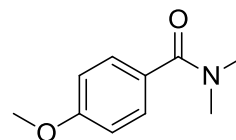

| Parameter                 | Value               |
|---------------------------|---------------------|
| 1 Title                   | RH930a-             |
| 2 Origin                  | mercury             |
| 3 Owner                   |                     |
| 4 Solvent                 | cdcl3               |
| 5 Pulse Sequence          | s2pul               |
| 6 Acquisition Date        | 2012-06-27T10:38:25 |
| 7 Modification Date       |                     |
| 8 Temperature             | 25.0                |
| 9 Number of Scans         | 8                   |
| 10 Spectrometer Frequency | 400.46              |
| 11 Spectral Width         | 6406.1              |
| 12 Lowest Frequency       | ~807.5              |
| 13 Nucleus                | <sup>1</sup> H      |
| 14 Acquired Size          | 16384               |
| 15 Spectral Size          | 32768               |

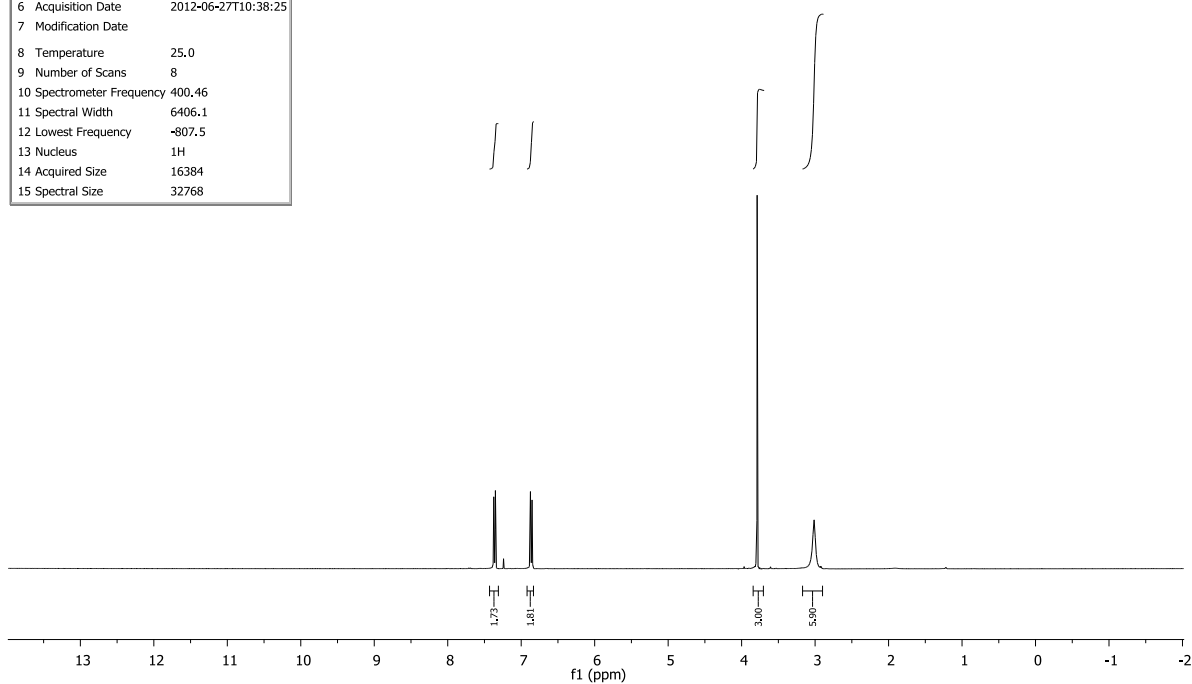

| Parameter                 | Value               |
|---------------------------|---------------------|
| 1 Title                   | RH930a-             |
| 2 Origin                  | mercury             |
| 3 Owner                   |                     |
| 4 Solvent                 | cdcl3               |
| 5 Pulse Sequence          | s2pul               |
| 6 Acquisition Date        | 2012-06-27T10:38:25 |
| 7 Modification Date       |                     |
| 8 Temperature             | 25.0                |
| 9 Number of Scans         | 8                   |
| 10 Spectrometer Frequency | 400.46              |
| 11 Spectral Width         | 6406.1              |
| 12 Lowest Frequency       | ~807.5              |
| 13 Nucleus                | <sup>1</sup> H      |
| 14 Acquired Size          | 16384               |
| 15 Spectral Size          | 32768               |

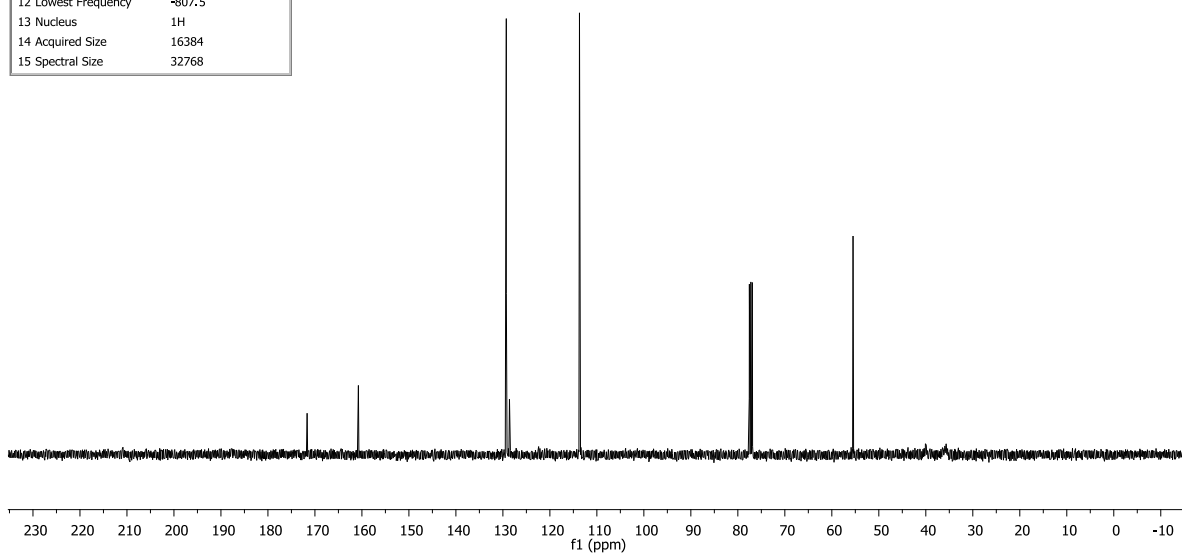

***tert*-butyl (3-(4-methoxybenzamido)propyl)carbamate (41)**

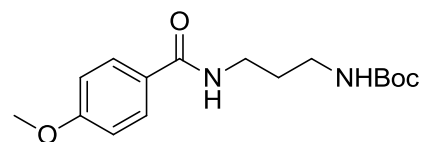

| Parameter                 | Value               |
|---------------------------|---------------------|
| 1 Title                   | carbon930a-         |
| 2 Origin                  | mercury             |
| 3 Owner                   |                     |
| 4 Solvent                 | cdcl3               |
| 5 Pulse Sequence          | s2pul               |
| 6 Acquisition Date        | 2012-06-27T10:39:11 |
| 7 Modification Date       |                     |
| 8 Temperature             | 25.0                |
| 9 Number of Scans         | 264                 |
| 10 Spectrometer Frequency | 100.71              |
| 11 Spectral Width         | 25188.9             |
| 12 Lowest Frequency       | -1498.2             |
| 13 Nucleus                | 13C                 |
| 14 Acquired Size          | 32768               |
| 15 Spectral Size          | 65536               |

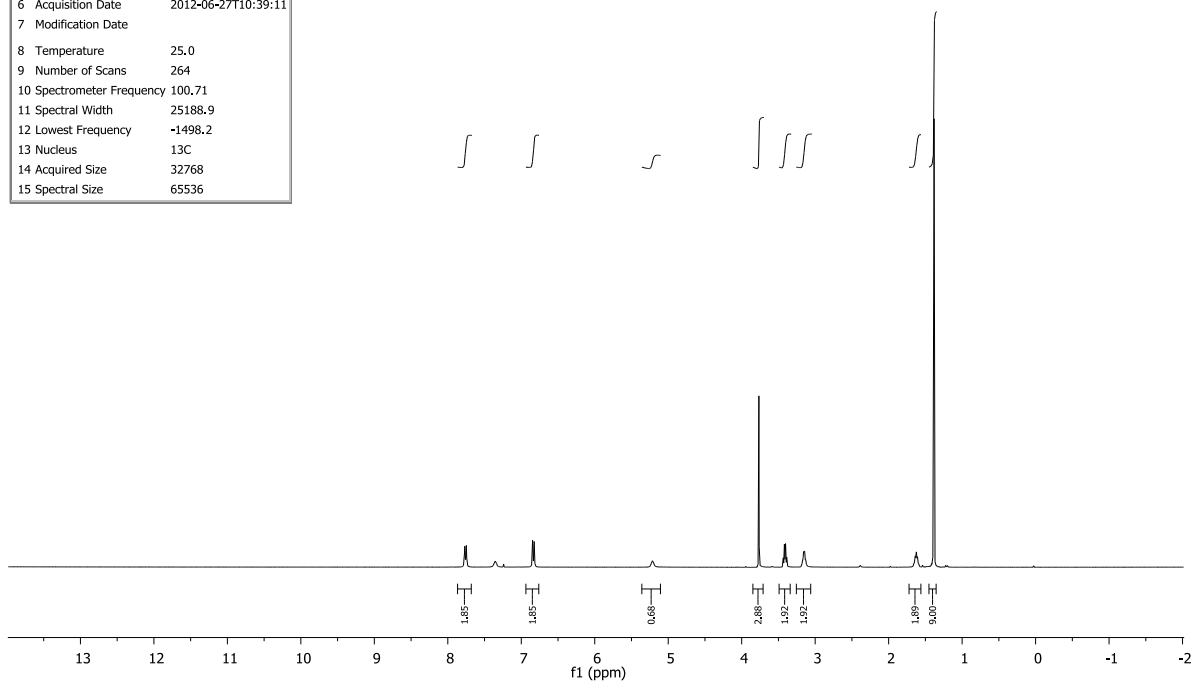

| Parameter                 | Value               |
|---------------------------|---------------------|
| 1 Title                   | RH938a-             |
| 2 Origin                  | mercury             |
| 3 Owner                   |                     |
| 4 Solvent                 | cdcl3               |
| 5 Pulse Sequence          | s2pul               |
| 6 Acquisition Date        | 2012-07-03T11:35:01 |
| 7 Modification Date       |                     |
| 8 Temperature             | 25.0                |
| 9 Number of Scans         | 8                   |
| 10 Spectrometer Frequency | 400.46              |
| 11 Spectral Width         | 6406.1              |
| 12 Lowest Frequency       | -807.1              |
| 13 Nucleus                | 1H                  |
| 14 Acquired Size          | 16384               |
| 15 Spectral Size          | 32768               |

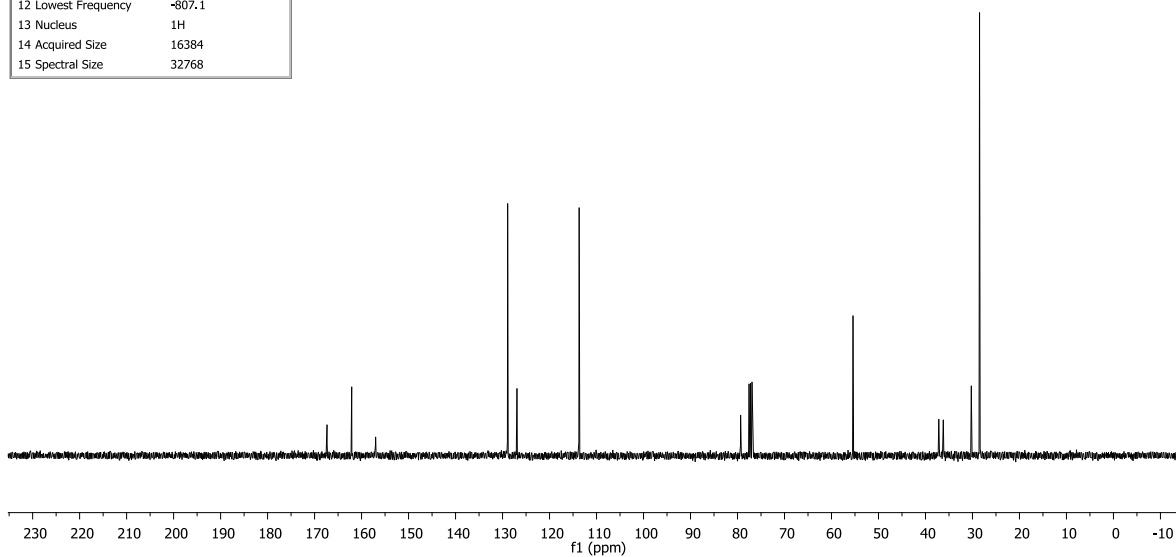

# 4-methoxy-*N*-(4-nitrobenzyl)benzamide (42)

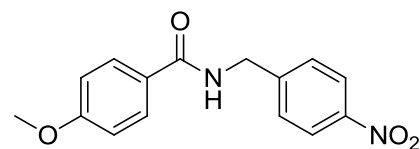

| Parameter                 | Value               |
|---------------------------|---------------------|
| 1 Title                   | RH937a              |
| 2 Origin                  | mercury             |
| 3 Owner                   |                     |
| 4 Solvent                 | cdcl3               |
| 5 Pulse Sequence          | s2pul               |
| 6 Acquisition Date        | 2012-07-03T11:14:04 |
| 7 Modification Date       |                     |
| 8 Temperature             | 25.0                |
| 9 Number of Scans         | 8                   |
| 10 Spectrometer Frequency | 400.46              |
| 11 Spectral Width         | 6406.1              |
| 12 Lowest Frequency       | ~807.3              |
| 13 Nucleus                | <sup>1</sup> H      |
| 14 Acquired Size          | 16384               |
| 15 Spectral Size          | 32768               |

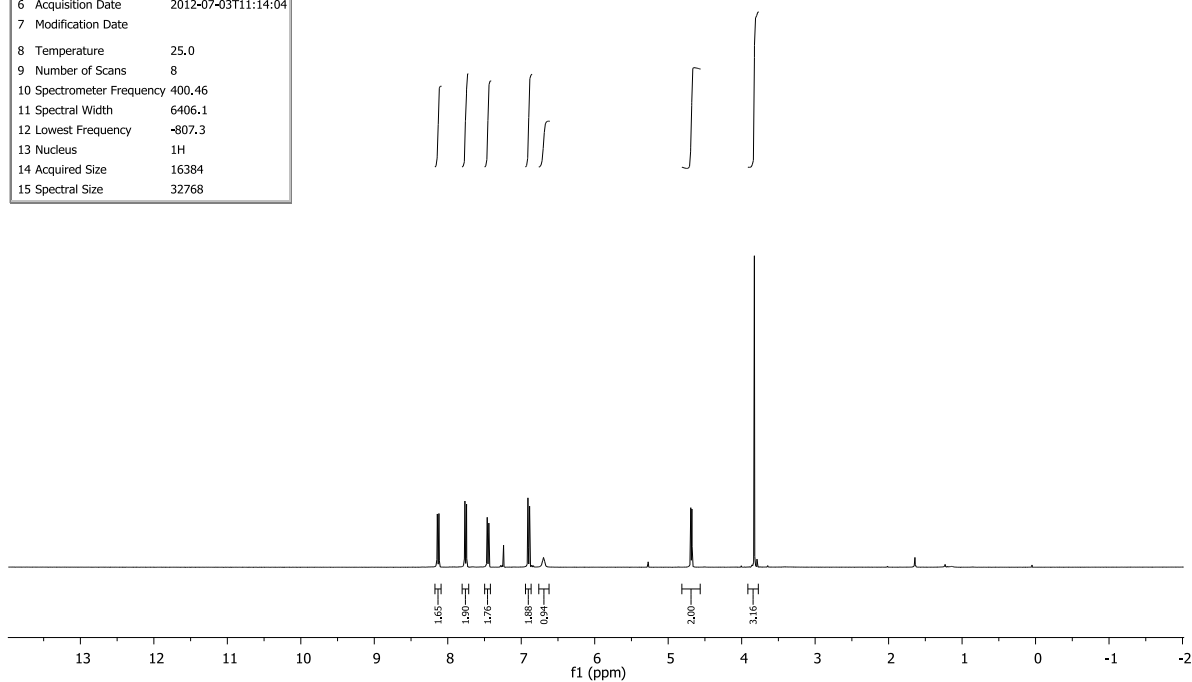

| Parameter                 | Value               |
|---------------------------|---------------------|
| 1 Title                   | carbon937a          |
| 2 Origin                  | mercury             |
| 3 Owner                   |                     |
| 4 Solvent                 | cdcl3               |
| 5 Pulse Sequence          | s2pul               |
| 6 Acquisition Date        | 2012-07-03T11:15:18 |
| 7 Modification Date       |                     |
| 8 Temperature             | 25.0                |
| 9 Number of Scans         | 392                 |
| 10 Spectrometer Frequency | 100.71              |
| 11 Spectral Width         | 25188.9             |
| 12 Lowest Frequency       | ~1494.9             |
| 13 Nucleus                | <sup>13</sup> C     |
| 14 Acquired Size          | 32768               |
| 15 Spectral Size          | 65536               |

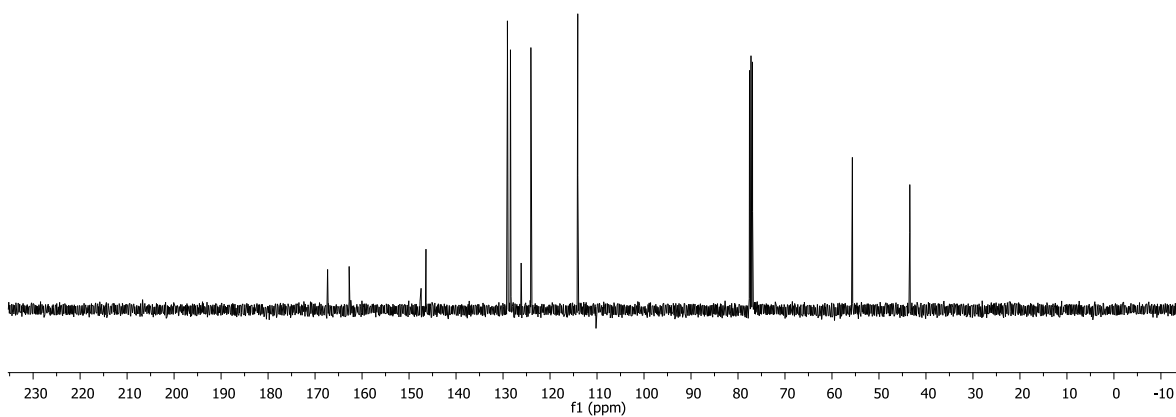

# ***N*-(*tert*-butyl)-4-methoxybenzamide (43)**

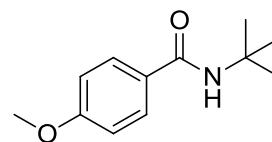

| Parameter                 | Value               |
|---------------------------|---------------------|
| 1 Title                   | carbon937a          |
| 2 Origin                  | mercury             |
| 3 Owner                   |                     |
| 4 Solvent                 | cdcl3               |
| 5 Pulse Sequence          | s2pul               |
| 6 Acquisition Date        | 2012-07-03T11:15:18 |
| 7 Modification Date       |                     |
| 8 Temperature             | 25.0                |
| 9 Number of Scans         | 392                 |
| 10 Spectrometer Frequency | 100.71              |
| 11 Spectral Width         | 25188.9             |
| 12 Lowest Frequency       | -1494.9             |
| 13 Nucleus                | 13C                 |
| 14 Acquired Size          | 32768               |
| 15 Spectral Size          | 65536               |

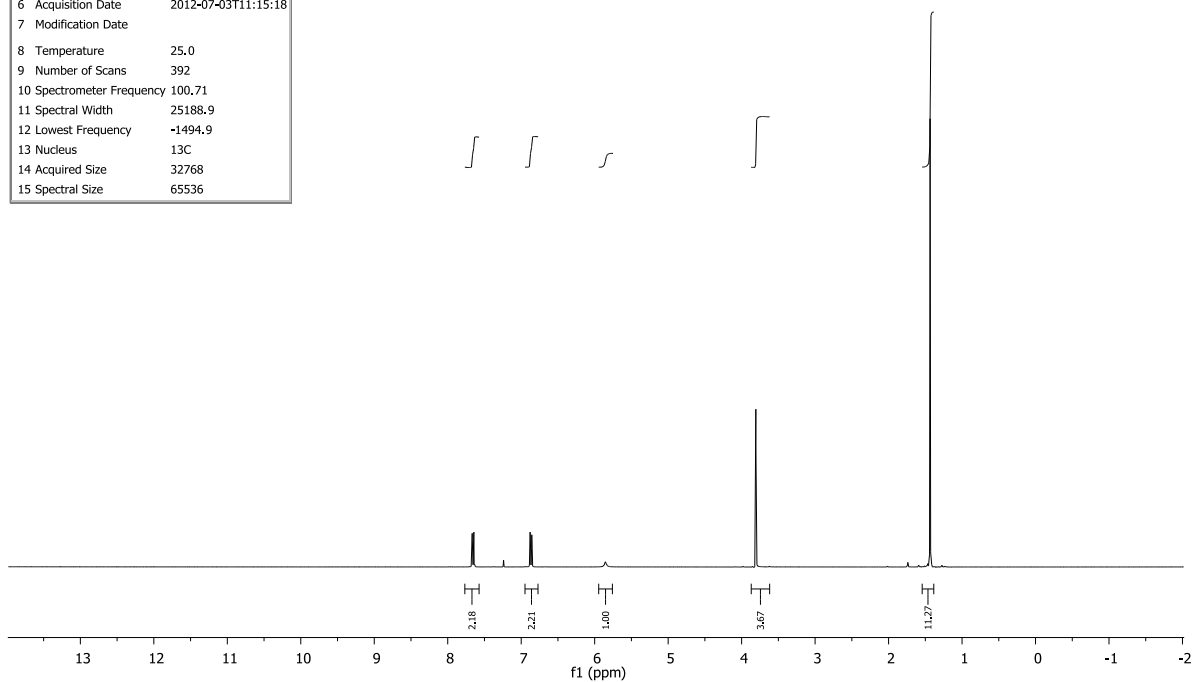

| Parameter                 | Value               |
|---------------------------|---------------------|
| 1 Title                   | RH931a-             |
| 2 Origin                  | mercury             |
| 3 Owner                   |                     |
| 4 Solvent                 | cdcl3               |
| 5 Pulse Sequence          | s2pul               |
| 6 Acquisition Date        | 2012-06-27T10:51:24 |
| 7 Modification Date       |                     |
| 8 Temperature             | 25.0                |
| 9 Number of Scans         | 8                   |
| 10 Spectrometer Frequency | 400.46              |
| 11 Spectral Width         | 6406.1              |
| 12 Lowest Frequency       | -807.5              |
| 13 Nucleus                | 1H                  |
| 14 Acquired Size          | 16384               |
| 15 Spectral Size          | 32768               |

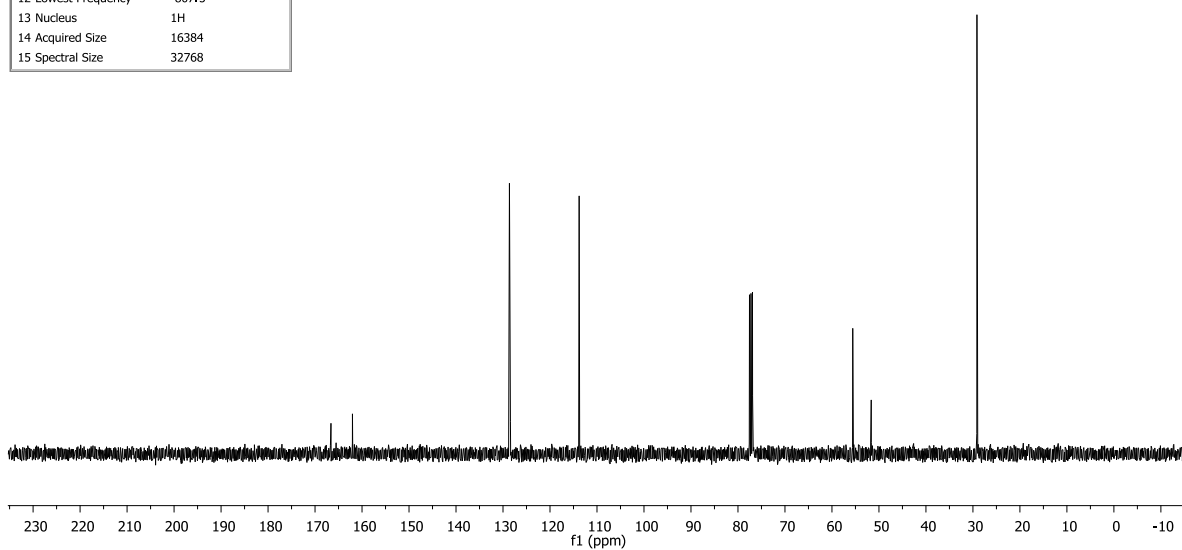

**(4-(cyclopropanecarbonyl)piperazin-1-yl)(4-((4-methoxyphenyl)thio)phenyl)methanone (44)**

| Parameter                 | Value               |
|---------------------------|---------------------|
| 1 Title                   | RH906a-             |
| 2 Origin                  | mercury             |
| 3 Owner                   |                     |
| 4 Solvent                 | cdcl3               |
| 5 Pulse Sequence          | s2pul               |
| 6 Acquisition Date        | 2012-05-23T08:55:05 |
| 7 Modification Date       |                     |
| 8 Temperature             | 25.0                |
| 9 Number of Scans         | 8                   |
| 10 Spectrometer Frequency | 400.46              |
| 11 Spectral Width         | 6406.1              |
| 12 Lowest Frequency       | ~807.1              |
| 13 Nucleus                | <sup>1</sup> H      |
| 14 Acquired Size          | 16384               |
| 15 Spectral Size          | 32768               |

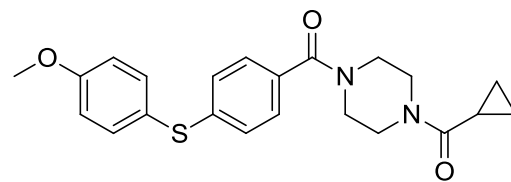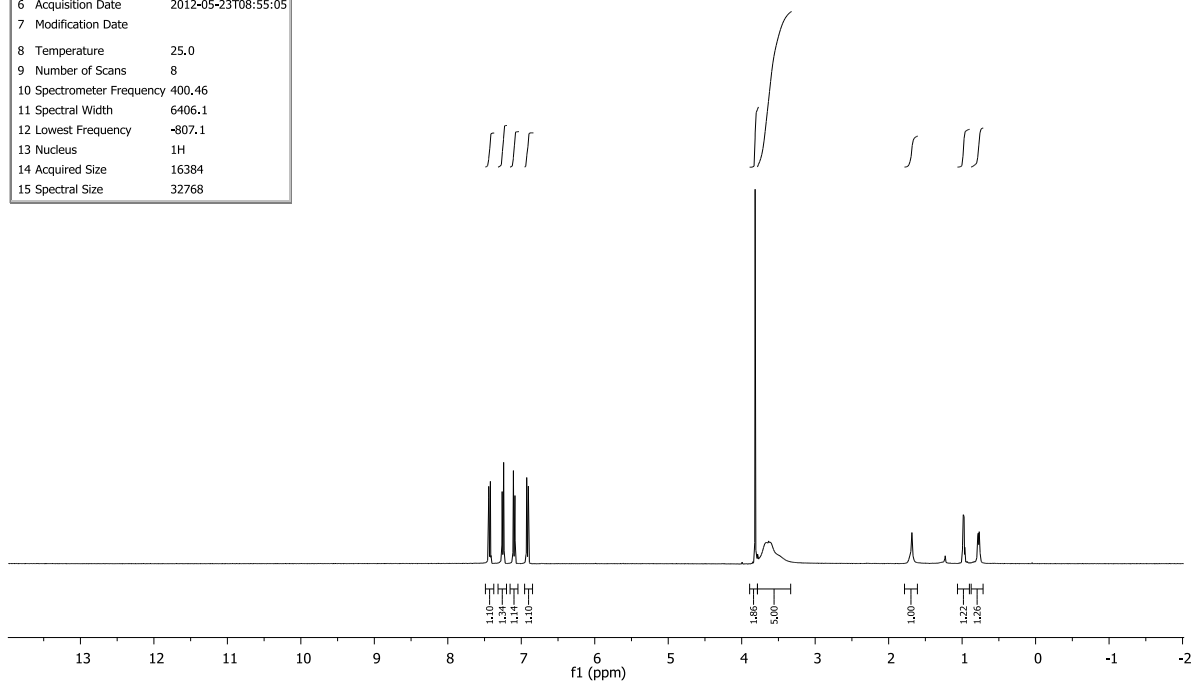

| Parameter                 | Value               |
|---------------------------|---------------------|
| 1 Title                   | RH906a-             |
| 2 Origin                  | mercury             |
| 3 Owner                   |                     |
| 4 Solvent                 | cdcl3               |
| 5 Pulse Sequence          | s2pul               |
| 6 Acquisition Date        | 2012-05-23T08:55:05 |
| 7 Modification Date       |                     |
| 8 Temperature             | 25.0                |
| 9 Number of Scans         | 8                   |
| 10 Spectrometer Frequency | 400.46              |
| 11 Spectral Width         | 6406.1              |
| 12 Lowest Frequency       | ~807.1              |
| 13 Nucleus                | <sup>1</sup> H      |
| 14 Acquired Size          | 16384               |
| 15 Spectral Size          | 32768               |

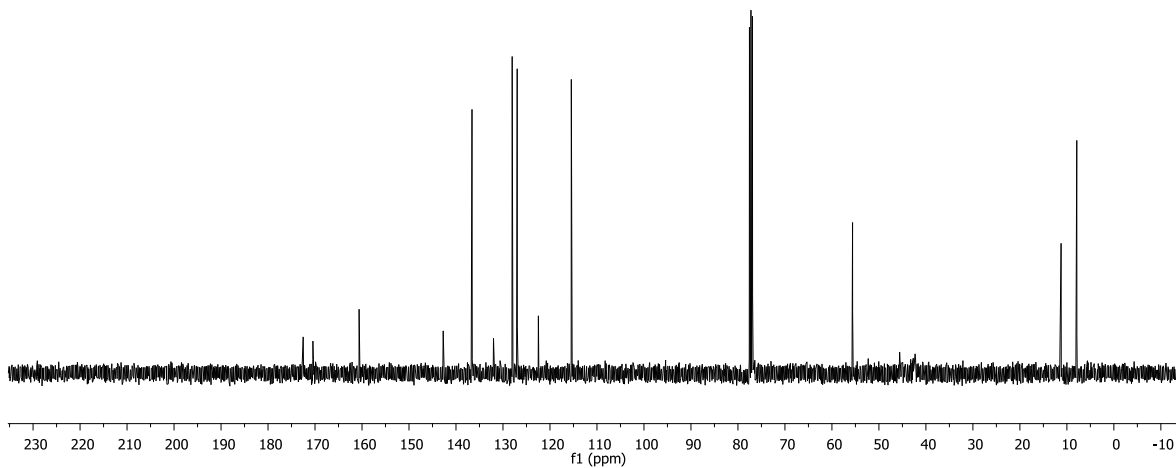

# 4-((4-methoxyphenyl)thio)-*N*-(3-phenylprop-2-yn-1-yl)benzamide (45)

| Parameter                 | Value               |
|---------------------------|---------------------|
| 1 Title                   | carbon906a-         |
| 2 Origin                  | mercury             |
| 3 Owner                   |                     |
| 4 Solvent                 | cdcl3               |
| 5 Pulse Sequence          | s2pul               |
| 6 Acquisition Date        | 2012-05-23T08:56:49 |
| 7 Modification Date       |                     |
| 8 Temperature             | 25.0                |
| 9 Number of Scans         | 296                 |
| 10 Spectrometer Frequency | 100.71              |
| 11 Spectral Width         | 25188.9             |
| 12 Lowest Frequency       | -1496.0             |
| 13 Nucleus                | 13C                 |
| 14 Acquired Size          | 32768               |
| 15 Spectral Size          | 65536               |

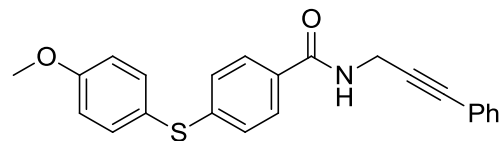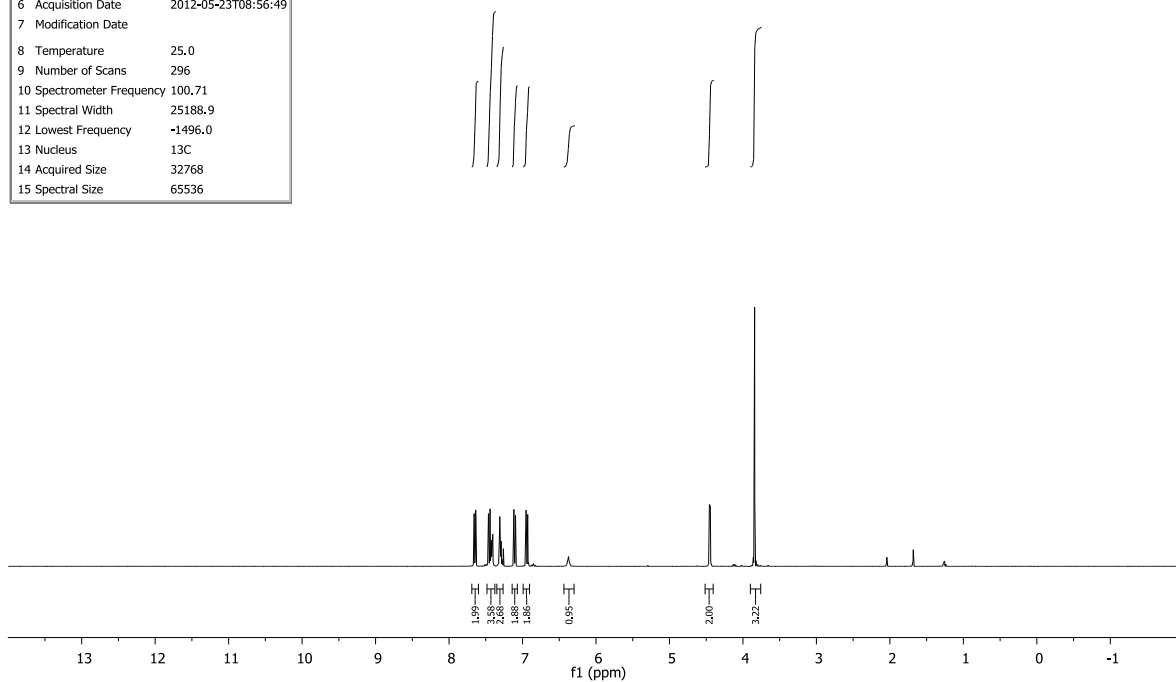

| Parameter                 | Value               |
|---------------------------|---------------------|
| 1 Title                   | RH907a-             |
| 2 Origin                  | mercury             |
| 3 Owner                   |                     |
| 4 Solvent                 | cdcl3               |
| 5 Pulse Sequence          | s2pul               |
| 6 Acquisition Date        | 2012-05-23T11:35:05 |
| 7 Modification Date       |                     |
| 8 Temperature             | 25.0                |
| 9 Number of Scans         | 8                   |
| 10 Spectrometer Frequency | 400.46              |
| 11 Spectral Width         | 6406.1              |
| 12 Lowest Frequency       | -800.3              |
| 13 Nucleus                | 1H                  |
| 14 Acquired Size          | 16384               |
| 15 Spectral Size          | 32768               |

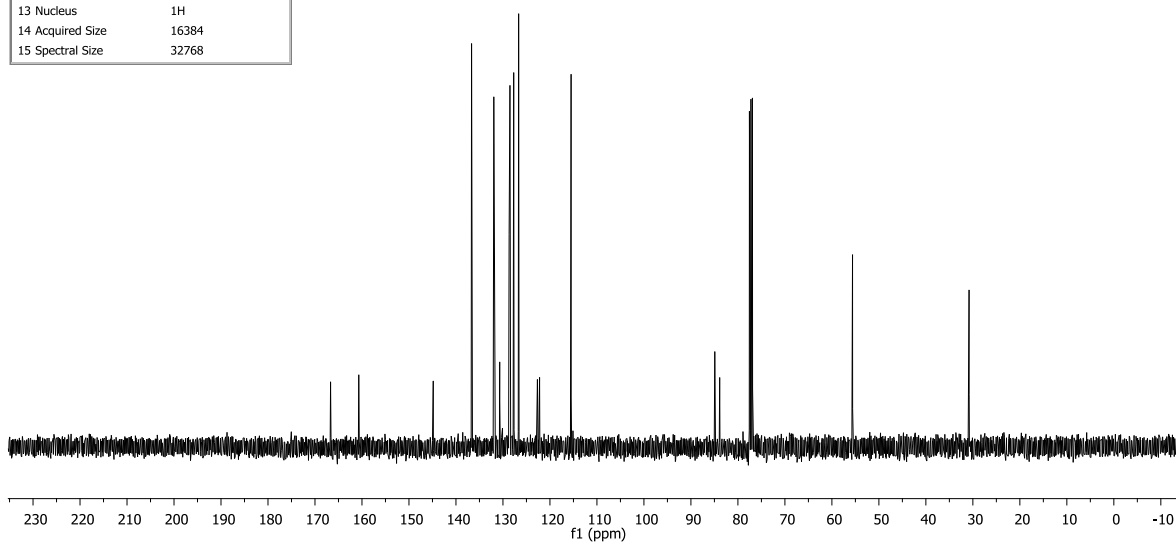

***tert*-butyl (3-(4-((4-methoxyphenyl)thio)benzamido)propyl)carbamate (46)**

| Parameter                 | Value               |
|---------------------------|---------------------|
| 1 Title                   | MNB320.F43-51.H2    |
| 2 Origin                  | mercury             |
| 3 Owner                   |                     |
| 4 Solvent                 | cdcl3               |
| 5 Pulse Sequence          | s2pul               |
| 6 Acquisition Date        | 2012-11-16T12:21:44 |
| 7 Modification Date       |                     |
| 8 Temperature             | 25.0                |
| 9 Number of Scans         | 8                   |
| 10 Spectrometer Frequency | 400.46              |
| 11 Spectral Width         | 6406.1              |
| 12 Lowest Frequency       | -800.3              |
| 13 Nucleus                | <sup>1</sup> H      |
| 14 Acquired Size          | 16384               |
| 15 Spectral Size          | 32768               |

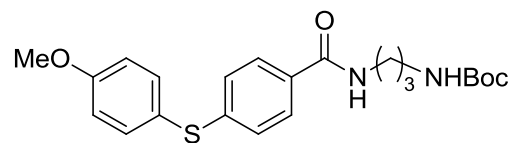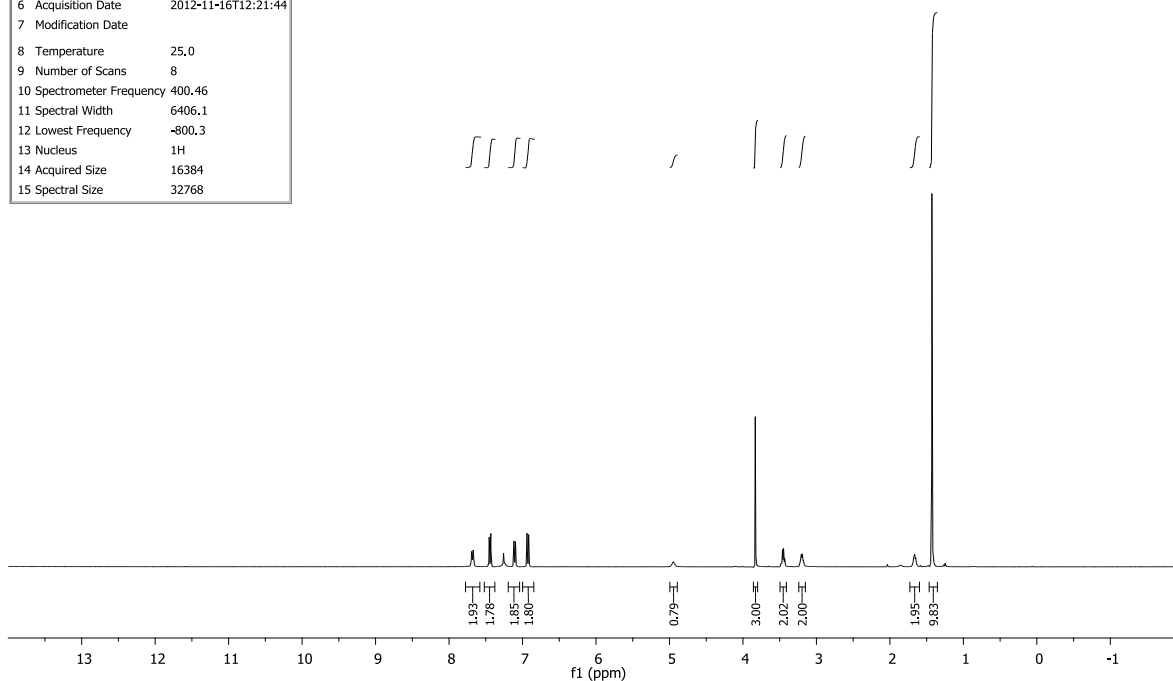

| Parameter                 | Value               |
|---------------------------|---------------------|
| 1 Title                   | MNB320.F43-51.C     |
| 2 Origin                  | mercury             |
| 3 Owner                   |                     |
| 4 Solvent                 | cdcl3               |
| 5 Pulse Sequence          | s2pul               |
| 6 Acquisition Date        | 2012-11-16T12:32:21 |
| 7 Modification Date       |                     |
| 8 Temperature             | 25.0                |
| 9 Number of Scans         | 256                 |
| 10 Spectrometer Frequency | 100.71              |
| 11 Spectral Width         | 25188.9             |
| 12 Lowest Frequency       | -1517.9             |
| 13 Nucleus                | <sup>13</sup> C     |
| 14 Acquired Size          | 32768               |
| 15 Spectral Size          | 65536               |

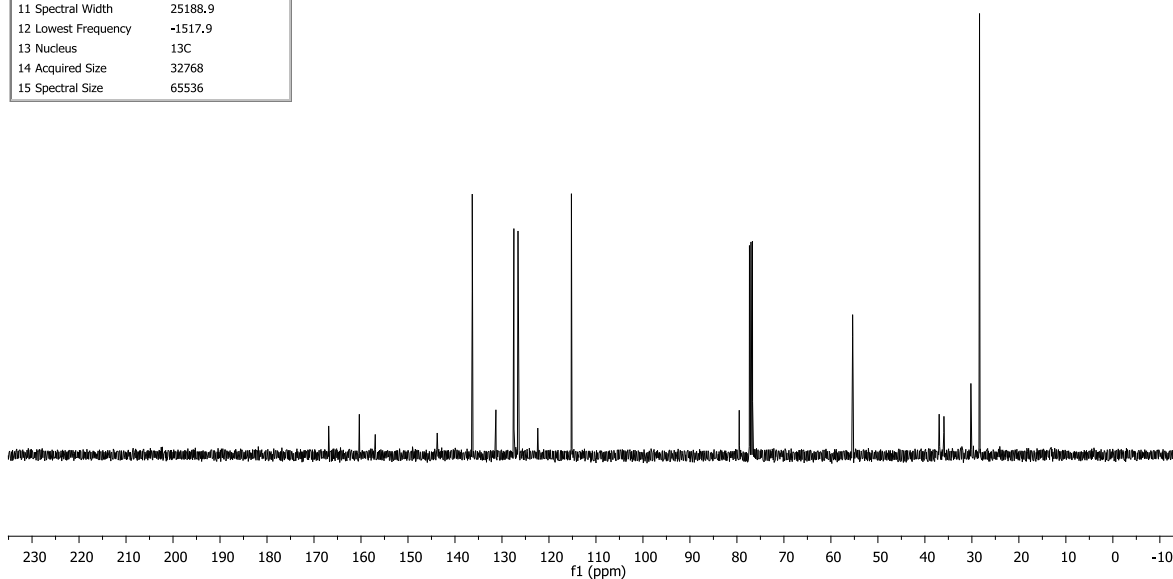

**S-(2,4-dimethylphenyl) 2-((2,4-dimethylphenyl)thio)benzothioate (47)**

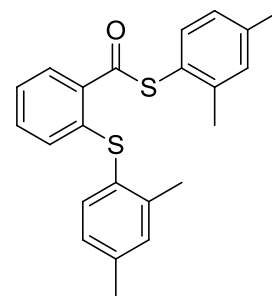

| Parameter                 | Value               |
|---------------------------|---------------------|
| 1 Title                   | MNB270-2.F9-17.H    |
| 2 Origin                  | mercury             |
| 3 Owner                   |                     |
| 4 Solvent                 | cdcl3               |
| 5 Pulse Sequence          | s2pul               |
| 6 Acquisition Date        | 2012-08-07T08:56:04 |
| 7 Modification Date       |                     |
| 8 Temperature             | 25.0                |
| 9 Number of Scans         | 8                   |
| 10 Spectrometer Frequency | 400.46              |
| 11 Spectral Width         | 6406.1              |
| 12 Lowest Frequency       | ~800.3              |
| 13 Nucleus                | <sup>1</sup> H      |
| 14 Acquired Size          | 16384               |
| 15 Spectral Size          | 32768               |

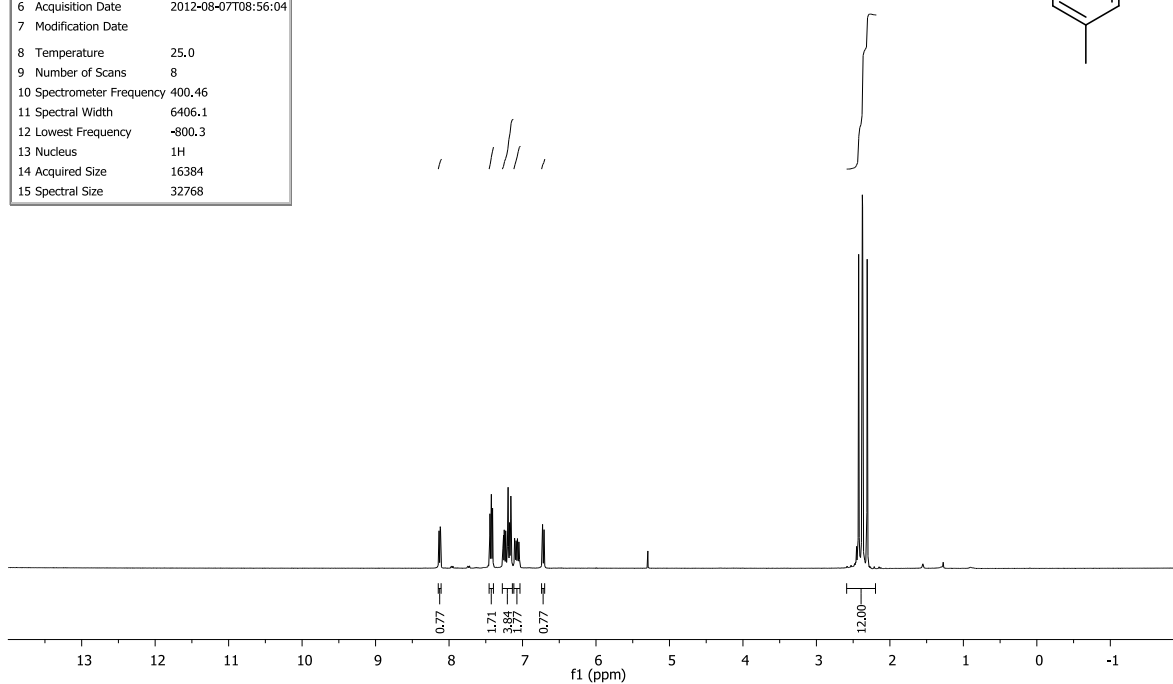

| Parameter                 | Value               |
|---------------------------|---------------------|
| 1 Title                   | MNB270-2.F9-17.H    |
| 2 Origin                  | mercury             |
| 3 Owner                   |                     |
| 4 Solvent                 | cdcl3               |
| 5 Pulse Sequence          | s2pul               |
| 6 Acquisition Date        | 2012-08-07T09:07:00 |
| 7 Modification Date       |                     |
| 8 Temperature             | 25.0                |
| 9 Number of Scans         | 256                 |
| 10 Spectrometer Frequency | 100.71              |
| 11 Spectral Width         | 25188.9             |
| 12 Lowest Frequency       | ~1517.9             |
| 13 Nucleus                | <sup>13</sup> C     |
| 14 Acquired Size          | 32768               |
| 15 Spectral Size          | 65536               |

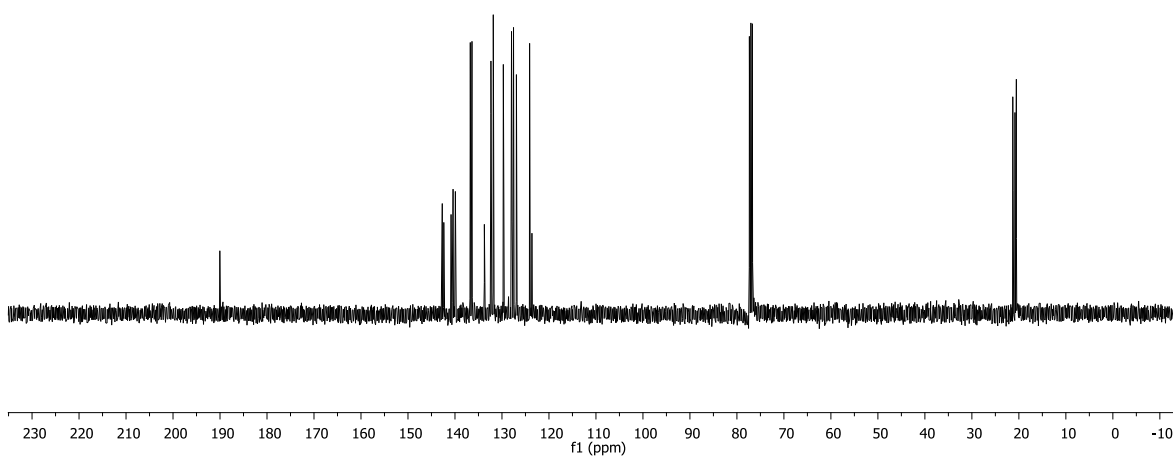

***S*-(2,4-dimethylphenyl) 2-((2,4-dimethylphenyl)thio)[<sup>13</sup>C]benzothioate (<sup>13</sup>C-47)**

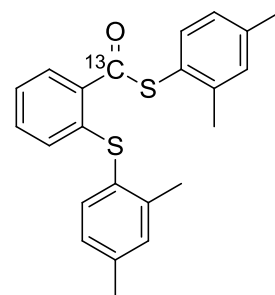

| Parameter                 | Value               |
|---------------------------|---------------------|
| 1 Title                   | MNB271.F9-19.H      |
| 2 Origin                  | mercury             |
| 3 Owner                   |                     |
| 4 Solvent                 | cdcl3               |
| 5 Pulse Sequence          | s2pul               |
| 6 Acquisition Date        | 2012-08-07T09:14:09 |
| 7 Modification Date       |                     |
| 8 Temperature             | 25.0                |
| 9 Number of Scans         | 8                   |
| 10 Spectrometer Frequency | 400.46              |
| 11 Spectral Width         | 6406.1              |
| 12 Lowest Frequency       | -800.3              |
| 13 Nucleus                | 1H                  |
| 14 Acquired Size          | 16384               |
| 15 Spectral Size          | 32768               |

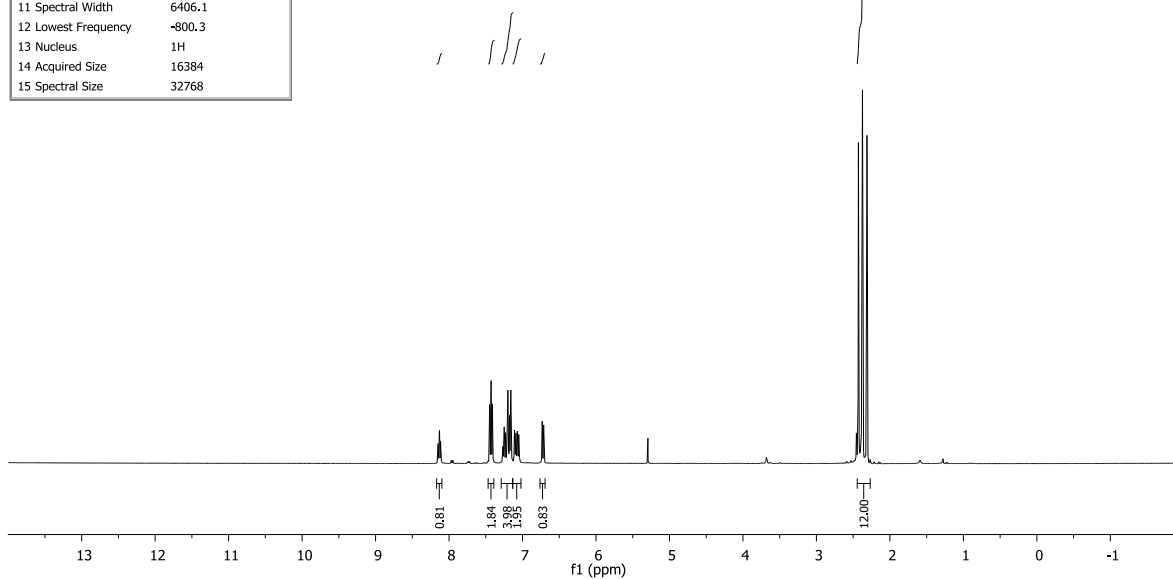

| Parameter                 | Value               |
|---------------------------|---------------------|
| 1 Title                   | MNB271.F9-19.C      |
| 2 Origin                  | mercury             |
| 3 Owner                   |                     |
| 4 Solvent                 | cdcl3               |
| 5 Pulse Sequence          | s2pul               |
| 6 Acquisition Date        | 2012-08-07T09:14:58 |
| 7 Modification Date       |                     |
| 8 Temperature             | 25.0                |
| 9 Number of Scans         | 24                  |
| 10 Spectrometer Frequency | 100.71              |
| 11 Spectral Width         | 25188.9             |
| 12 Lowest Frequency       | -1517.9             |
| 13 Nucleus                | 13C                 |
| 14 Acquired Size          | 32768               |
| 15 Spectral Size          | 65536               |

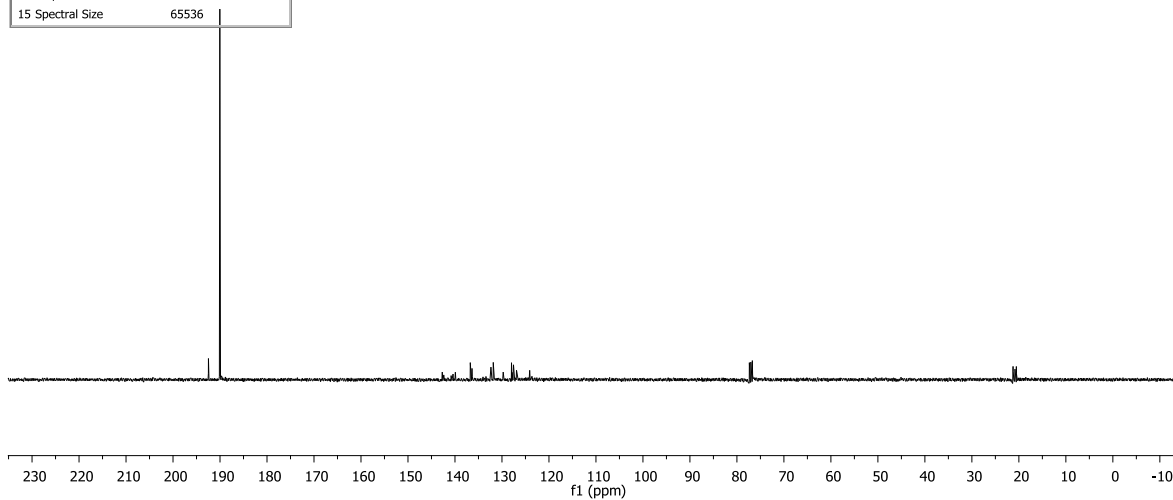

***tert*-butyl 4-(2-((2,4-dimethylphenyl)thio)benzoyl)piperazine-1-carboxylate (48)**

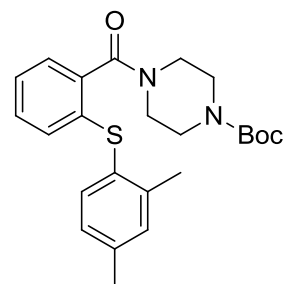

| Parameter                 | Value               |
|---------------------------|---------------------|
| 1 Title                   | MNB294.F7-16.H2     |
| 2 Origin                  | mercury             |
| 3 Owner                   |                     |
| 4 Solvent                 | cdcl3               |
| 5 Pulse Sequence          | s2pul               |
| 6 Acquisition Date        | 2012-09-26T15:50:46 |
| 7 Modification Date       |                     |
| 8 Temperature             | 25.0                |
| 9 Number of Scans         | 8                   |
| 10 Spectrometer Frequency | 400.46              |
| 11 Spectral Width         | 6406.1              |
| 12 Lowest Frequency       | ~800.3              |
| 13 Nucleus                | <sup>1</sup> H      |
| 14 Acquired Size          | 16384               |
| 15 Spectral Size          | 32768               |

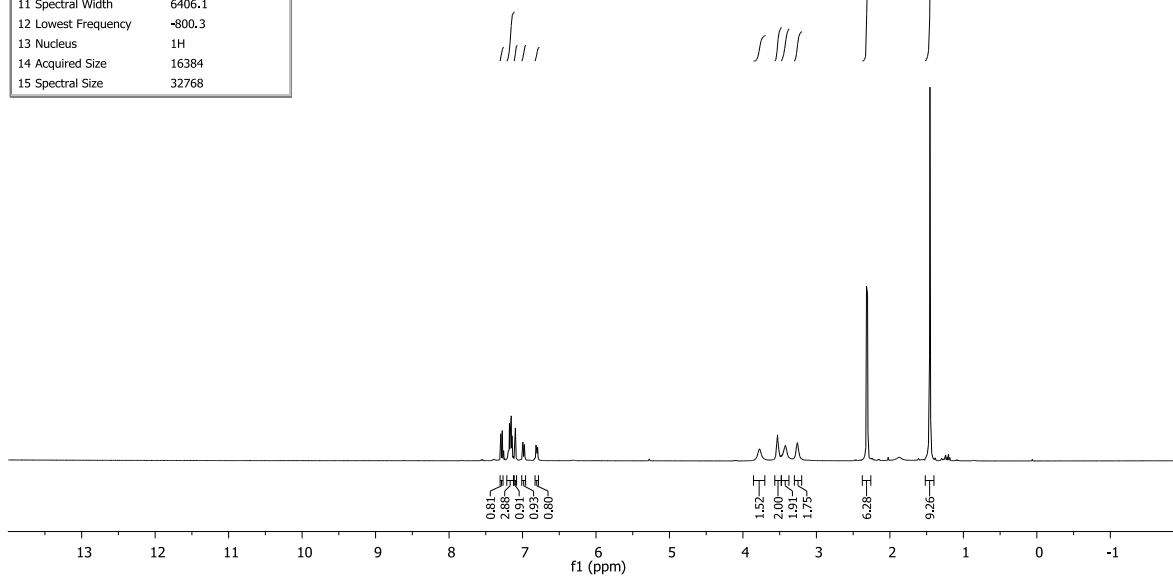

| Parameter                 | Value               |
|---------------------------|---------------------|
| 1 Title                   | MNB294.F7-16.o/ n.C |
| 2 Origin                  | mercury             |
| 3 Owner                   |                     |
| 4 Solvent                 | cdcl3               |
| 5 Pulse Sequence          | s2pul               |
| 6 Acquisition Date        | 2012-09-26T16:15:17 |
| 7 Modification Date       |                     |
| 8 Temperature             | 25.0                |
| 9 Number of Scans         | 23892               |
| 10 Spectrometer Frequency | 100.71              |
| 11 Spectral Width         | 25188.9             |
| 12 Lowest Frequency       | ~1517.9             |
| 13 Nucleus                | <sup>13</sup> C     |
| 14 Acquired Size          | 32768               |
| 15 Spectral Size          | 65536               |

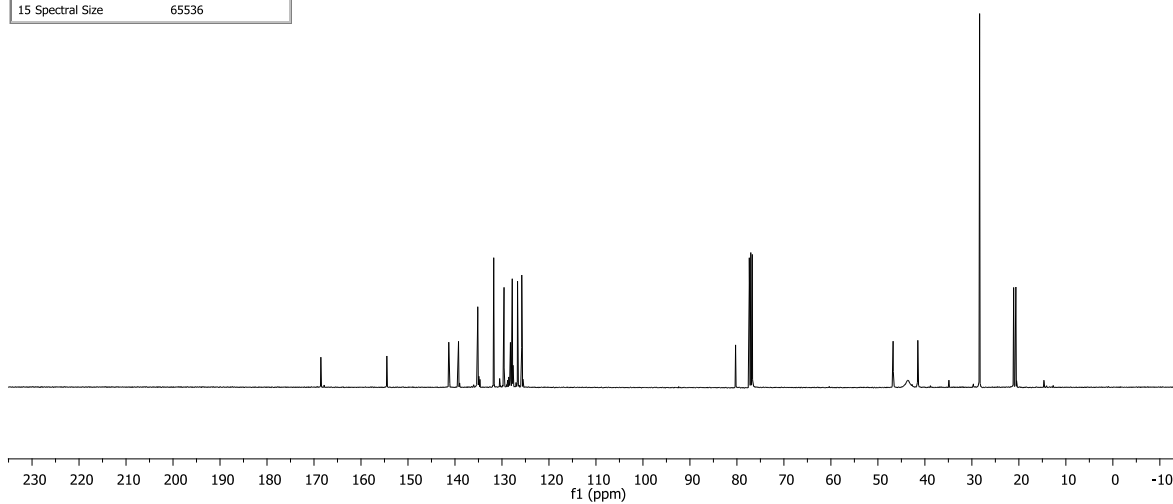

***tert*-butyl 4-(2-((2,4-dimethylphenyl)thio)[<sup>13</sup>C]benzoyl)piperazine-1-carboxylate (<sup>13</sup>C-48)**

| Parameter                 | Value               |
|---------------------------|---------------------|
| 1 Title                   | MNB310.F9-24.H2     |
| 2 Origin                  | mercury             |
| 3 Owner                   |                     |
| 4 Solvent                 | cdcl3               |
| 5 Pulse Sequence          | s2pul               |
| 6 Acquisition Date        | 2012-10-23T09:23:29 |
| 7 Modification Date       |                     |
| 8 Temperature             | 25.0                |
| 9 Number of Scans         | 8                   |
| 10 Spectrometer Frequency | 400.46              |
| 11 Spectral Width         | 6406.1              |
| 12 Lowest Frequency       | ~800.3              |
| 13 Nucleus                | <sup>1</sup> H      |
| 14 Acquired Size          | 16384               |
| 15 Spectral Size          | 32768               |

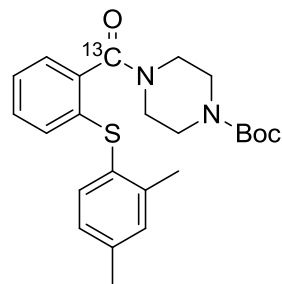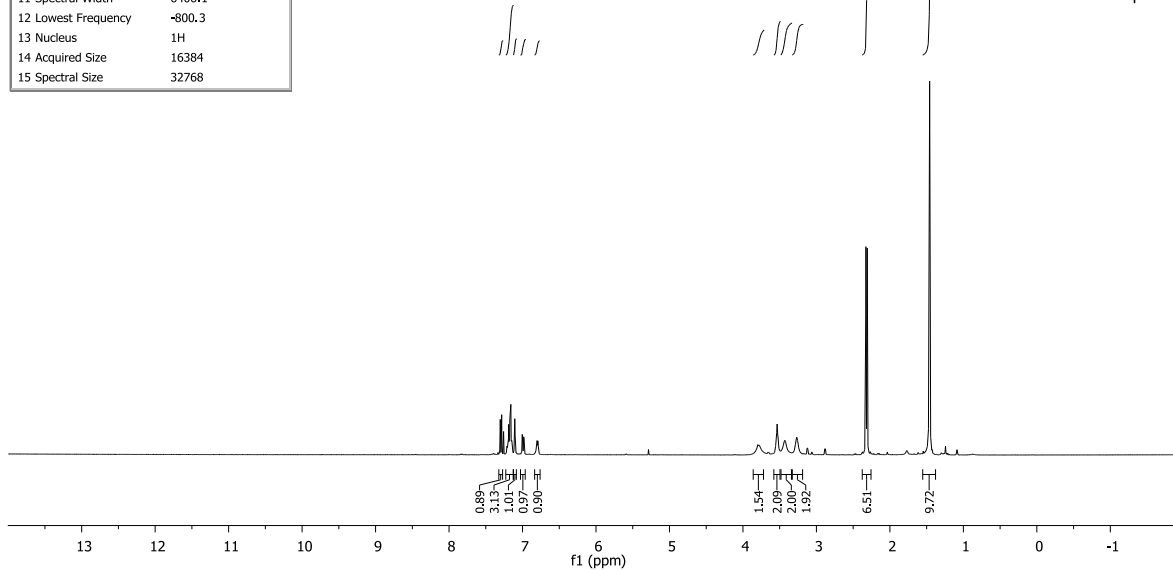

| Parameter                 | Value               |
|---------------------------|---------------------|
| 1 Title                   | MNB326.F11-28.C     |
| 2 Origin                  | mercury             |
| 3 Owner                   |                     |
| 4 Solvent                 | cdcl3               |
| 5 Pulse Sequence          | s2pul               |
| 6 Acquisition Date        | 2012-11-06T12:42:33 |
| 7 Modification Date       |                     |
| 8 Temperature             | 25.0                |
| 9 Number of Scans         | 256                 |
| 10 Spectrometer Frequency | 100.71              |
| 11 Spectral Width         | 25188.9             |
| 12 Lowest Frequency       | ~1517.9             |
| 13 Nucleus                | <sup>13</sup> C     |
| 14 Acquired Size          | 32768               |
| 15 Spectral Size          | 65536               |

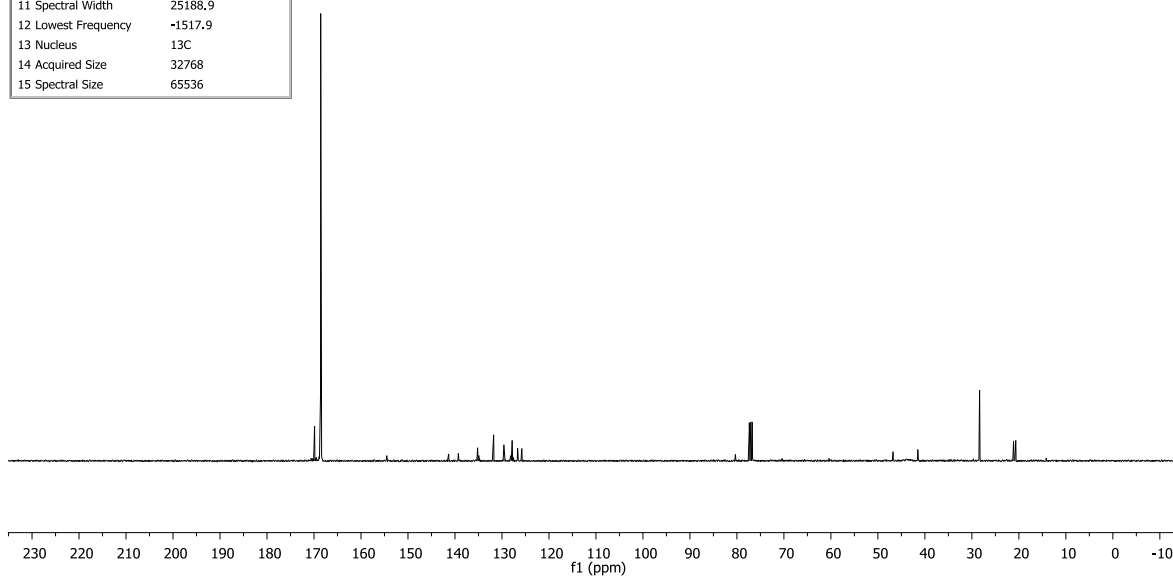

# 4-(2-((2,4-dimethylphenyl)thio)benzoyl)piperazin-1-ium trifluoroacetate (49)

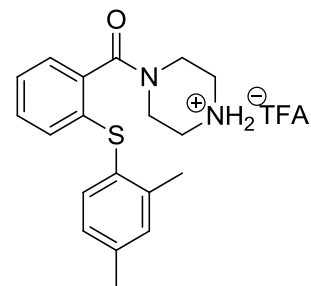

| Parameter                 | Value               |
|---------------------------|---------------------|
| 1 Title                   | MNB328.vac.H        |
| 2 Origin                  | mercury             |
| 3 Owner                   |                     |
| 4 Solvent                 | cdcl3               |
| 5 Pulse Sequence          | s2pul               |
| 6 Acquisition Date        | 2012-11-22T09:50:58 |
| 7 Modification Date       |                     |
| 8 Temperature             | 25.0                |
| 9 Number of Scans         | 8                   |
| 10 Spectrometer Frequency | 400.46              |
| 11 Spectral Width         | 6406.1              |
| 12 Lowest Frequency       | -793.5              |
| 13 Nucleus                | <sup>1</sup> H      |
| 14 Acquired Size          | 16384               |
| 15 Spectral Size          | 32768               |

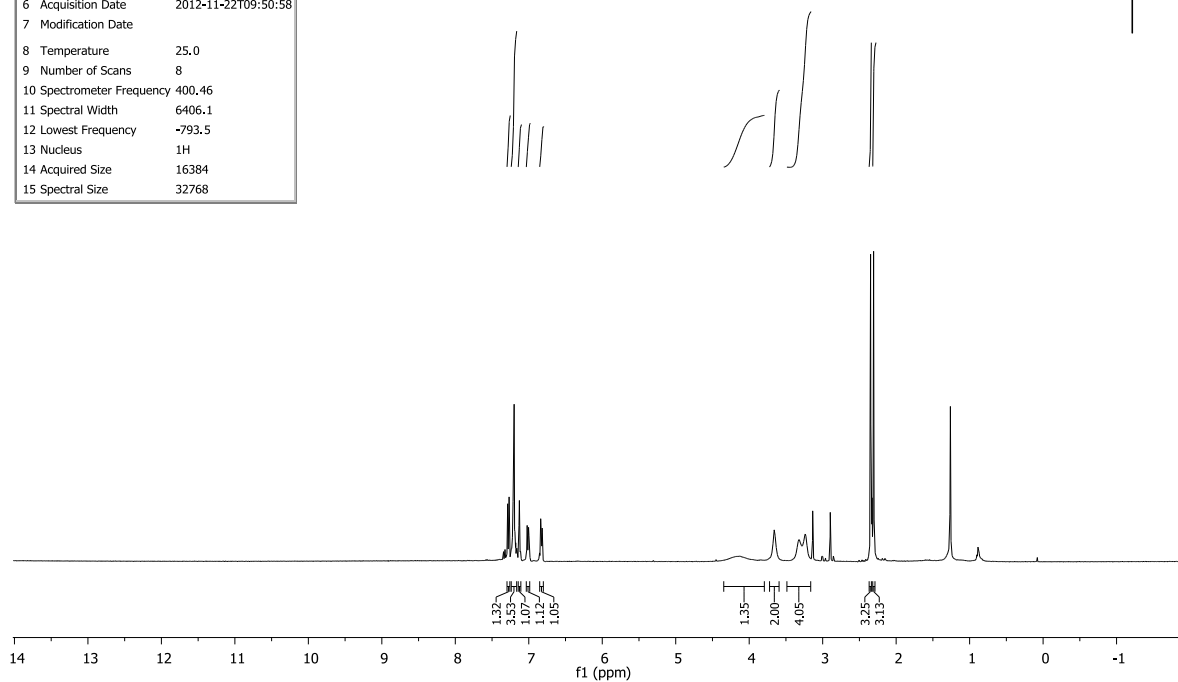

| Parameter                 | Value               |
|---------------------------|---------------------|
| 1 Title                   | MNB328.vac.C        |
| 2 Origin                  | mercury             |
| 3 Owner                   |                     |
| 4 Solvent                 | cdcl3               |
| 5 Pulse Sequence          | s2pul               |
| 6 Acquisition Date        | 2012-11-22T10:03:35 |
| 7 Modification Date       |                     |
| 8 Temperature             | 25.0                |
| 9 Number of Scans         | 300                 |
| 10 Spectrometer Frequency | 100.71              |
| 11 Spectral Width         | 25188.9             |
| 12 Lowest Frequency       | -1517.9             |
| 13 Nucleus                | <sup>13</sup> C     |
| 14 Acquired Size          | 32768               |
| 15 Spectral Size          | 65536               |

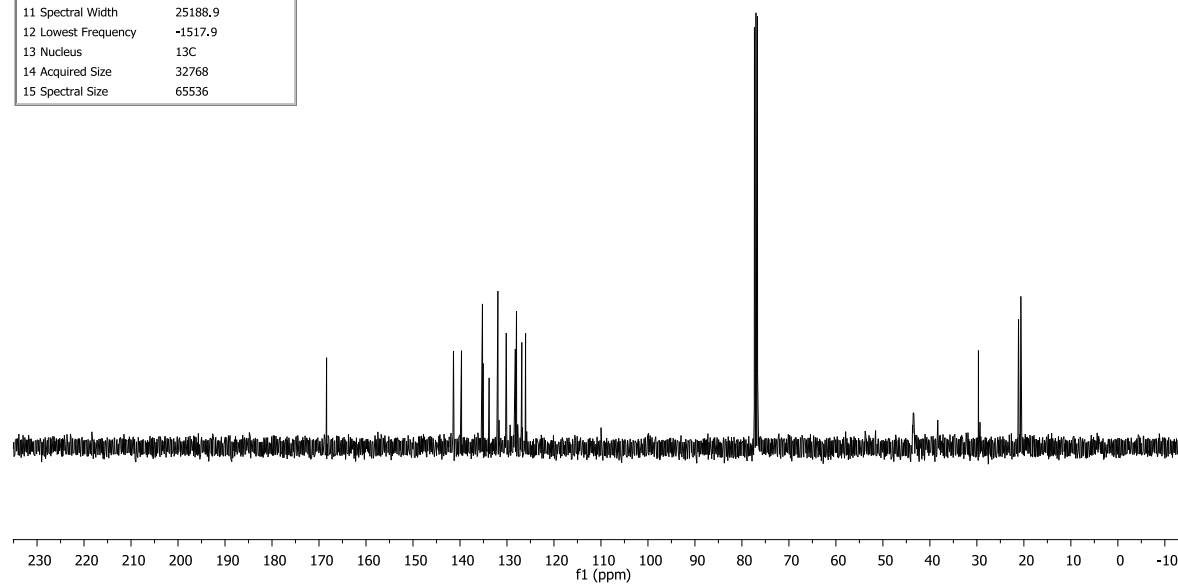

|    | Parameter              | Value               |
|----|------------------------|---------------------|
| 1  | Title                  | MNB328.vac.F        |
| 2  | Origin                 | mercury             |
| 3  | Owner                  |                     |
| 4  | Solvent                | cdcl3               |
| 5  | Pulse Sequence         | s2pul               |
| 6  | Acquisition Date       | 2012-11-22T12:33:28 |
| 7  | Modification Date      |                     |
| 8  | Temperature            | 25.0                |
| 9  | Number of Scans        | 16                  |
| 10 | Spectrometer Frequency | 376.78              |
| 11 | Spectral Width         | 86956.5             |
| 12 | Lowest Frequency       | -75507.1            |
| 13 | Nucleus                | 19F                 |
| 14 | Acquired Size          | 64000               |
| 15 | Spectral Size          | 131072              |

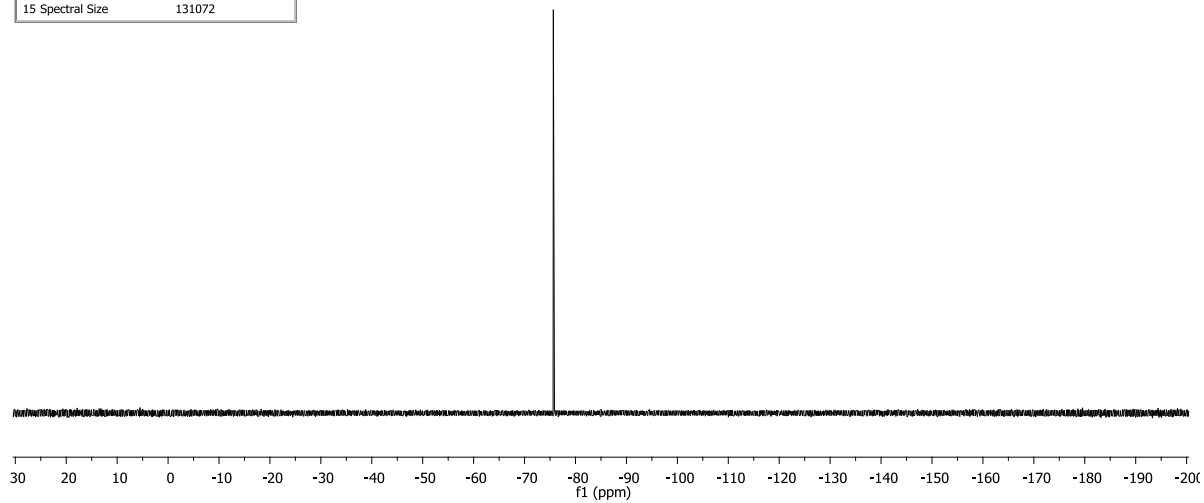

**4-(2-((2,4-dimethylphenyl)thio)[<sup>13</sup>C]benzoyl)piperazin-1-ium trifluoroacetate (<sup>13</sup>C-49)**

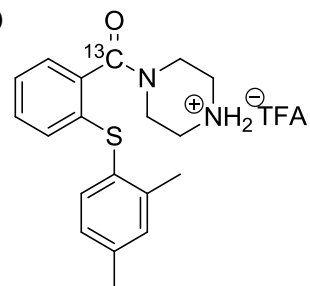

| Parameter                 | Value               |
|---------------------------|---------------------|
| 1 Title                   | MNB329.vac.F        |
| 2 Origin                  | mercury             |
| 3 Owner                   |                     |
| 4 Solvent                 | cdcl3               |
| 5 Pulse Sequence          | s2pul               |
| 6 Acquisition Date        | 2012-11-22T12:36:03 |
| 7 Modification Date       |                     |
| 8 Temperature             | 25.0                |
| 9 Number of Scans         | 16                  |
| 10 Spectrometer Frequency | 376.78              |
| 11 Spectral Width         | 86956.5             |
| 12 Lowest Frequency       | -75507.1            |
| 13 Nucleus                | 19F                 |
| 14 Acquired Size          | 64000               |
| 15 Spectral Size          | 131072              |

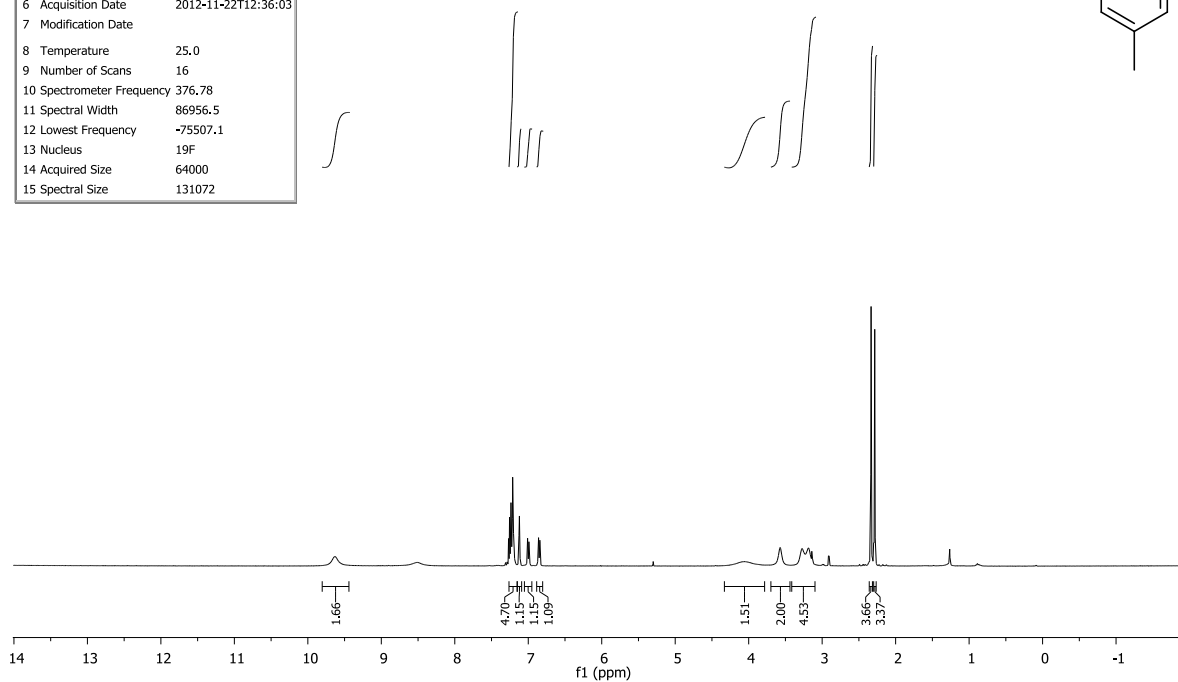

| Parameter                 | Value               |
|---------------------------|---------------------|
| 1 Title                   | MNB329.vac.C        |
| 2 Origin                  | mercury             |
| 3 Owner                   |                     |
| 4 Solvent                 | cdcl3               |
| 5 Pulse Sequence          | s2pul               |
| 6 Acquisition Date        | 2012-11-22T10:50:31 |
| 7 Modification Date       |                     |
| 8 Temperature             | 25.0                |
| 9 Number of Scans         | 350                 |
| 10 Spectrometer Frequency | 100.71              |
| 11 Spectral Width         | 25188.9             |
| 12 Lowest Frequency       | -1517.9             |
| 13 Nucleus                | 13C                 |
| 14 Acquired Size          | 32768               |
| 15 Spectral Size          | 65536               |

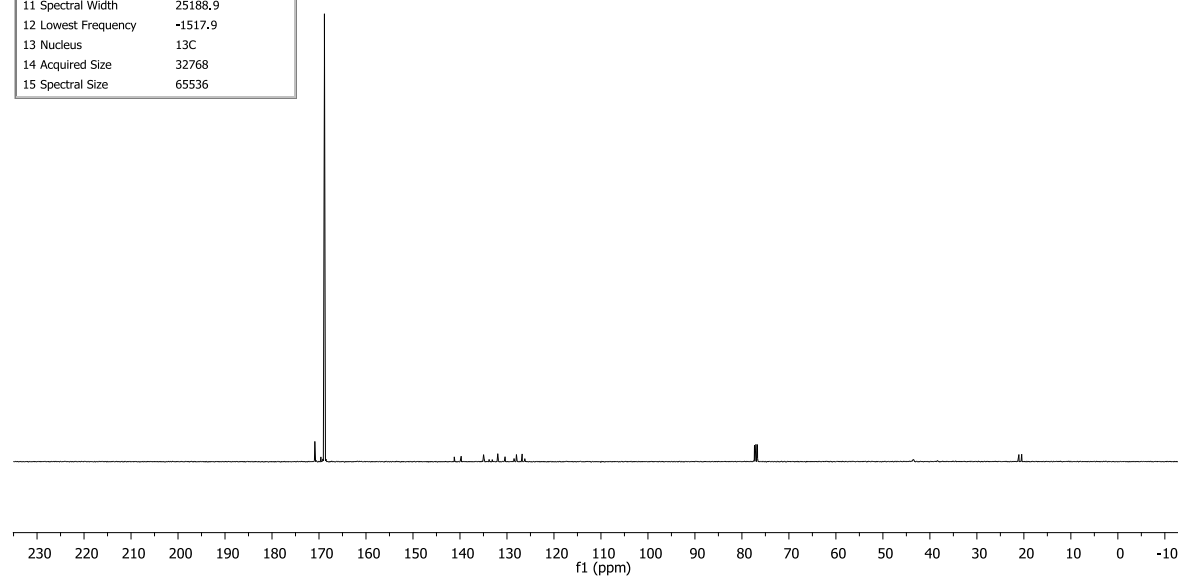

| Parameter                 | Value               |
|---------------------------|---------------------|
| 1 Title                   | MNB382.wu.H         |
| 2 Origin                  | mercury             |
| 3 Owner                   |                     |
| 4 Solvent                 | cdcl3               |
| 5 Pulse Sequence          | s2pul               |
| 6 Acquisition Date        | 2012-11-05T12:32:11 |
| 7 Modification Date       |                     |
| 8 Temperature             | 25.0                |
| 9 Number of Scans         | 8                   |
| 10 Spectrometer Frequency | 400.46              |
| 11 Spectral Width         | 6406.1              |
| 12 Lowest Frequency       | -800.3              |
| 13 Nucleus                | 1H                  |
| 14 Acquired Size          | 16384               |
| 15 Spectral Size          | 32768               |

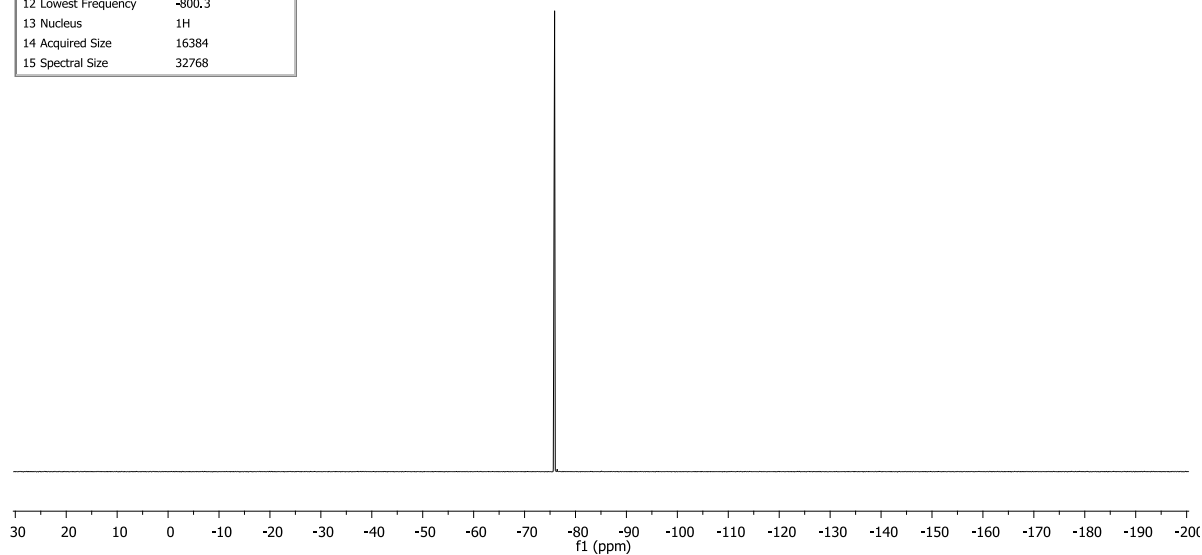

Supplement: Supplementary file 1 [file 4085806]
